# Supplementary material
Source: PubMed Central journal article supplement (PMC4568208)
Supplement: pnas.1508737112.sapp.pdf [file pnas.1508737112.sapp.pdf]

## Supplementary Information

**Title:** Functional metagenomic discovery of bacterial effectors in the human microbiome and isolation of commendamide, a GPCR G2A/132 agonist.

**Authors:** Louis J. Cohen<sup>1,2</sup>, Hahk-Soo Kang<sup>1</sup>, John Chu<sup>1</sup>, Yun-Han Huang<sup>1</sup>, Emma A. Gordon<sup>1</sup>, Boojala Vijay B. Reddy<sup>1</sup>, Melinda A. Ternei<sup>1</sup>, Jeffrey W. Craig<sup>3</sup>, Sean F. Brady<sup>1\*</sup>

\*To whom correspondence should be addressed: Email: [sbrady@rockefeller.edu](mailto:sbrady@rockefeller.edu)

### Author Affiliation

<sup>1</sup> Laboratory of Genetically Encoded Small Molecules, Howard Hughes Medical Institute, The Rockefeller University 1230 York Avenue, New York, NY 10065

<sup>2</sup> Icahn School of Medicine at Mount Sinai, 1 Gustave Levy Place, New York, NY 10029

### Current address:

<sup>3</sup> Department of Pathology, Brigham and Women's Hospital, Harvard Medical School, Boston, MA 02115, USA.

**Corresponding Author:** Sean F. Brady

### Contact

Laboratory of Genetically Encoded Small Molecules  
The Rockefeller University  
1230 York Avenue  
New York, NY 10065

Phone: 212-327-8280

Fax: 212 327 8281

Email: [sbrady@rockefeller.edu](mailto:sbrady@rockefeller.edu)

### Keywords

Functional Metagenomics, NF- $\kappa$ B, N-acyl amino acids, 3-OH N-acyl palmitoyl glycine, commendamide, Cbeg, eDNA

1  
2  
3  
4  
5  
6  
7  
8  
9  
0  
1  
2  
3  
4  
5  
6  
7  
8  
9  
0

## Table of Contents

SI Materials and Methods

Supplementary Figures

Fig S1: ppGpp synthetase Cbegs

Fig S2: Additional analysis of Cbeg4, 5, and 6/7

Fig S3: Cbeg12 functional and phylogenetic characterization

Fig S4: Bioassay (HEK293:NF- $\kappa$ B:GFP) guided purification of compounds 1- 4.

Fig S5: Z prime calculation and microplate layout

Fig S6: NMR Spectra for compounds 1 -4

Supplementary Tables

Table S1: Patient demographics

Table S2: A) Cosmid and Cbeg sequence analysis, B) Gene tables for each unique cosmid

C) Swissprot analysis

Table S3: NMR table for compounds 1 -4

1  
2  
3  
4  
5  
6  
7  
8  
9  
0  
1  
2  
3  
4  
5  
6  
7  
8  
9  
0  
1  
2  
3  
4  
5  
6  
7  
8

## **SI Materials and Methods**

### Storage and Robotic Array of Metagenomic Clones in 384 Well Microplates

Metagenomic clones from the CD and HC libraries were directly plated on Luria broth (LB) agar supplemented with 15 µg/ml tetracycline. Clones were individually selected using a colony picker (CP7200 Hudson) and placed into wells of a 384 well microplate containing LB medium (tetracycline 15 µg/ml). Negative control clones (*E. coli* EC100 cells containing the pJWC1 cosmid vector) were plated into columns 2 and 11 of the microplate. Plates were grown overnight at 37 °C, glycerol was added to a final concentration of 25% and plates were stored at -80 °C. Metagenomic clones from the UC patient library clones were arrayed using a liquid dispensing robot (Multidrop™ ThermoScientific). An overnight culture was diluted to ~1-3 clones per 100 µl of media and 100 µl of media was dispensed into each well of the microplate well. Microplates were stored at -80 °C in the same fashion as the other libraries.

### Z' for NF-κB Reporter Cells

HEK293:NF-κB:GFP cells were tested for robustness of NF-κB induced GFP expression using TNF α (Invitrogen) as a positive control and the TNF α activation inhibitor CAPE (caffeic acid phenethyl ester, Santa Cruz Biotech). Cells were incubated with TNF α or TNF α + CAPE for 24h and imaged using ImageXpress Micro XLS Widefield High Content Imaging System (Molecular Devices). Images were processed using MetaXpress (Molecular Devices) and the percent of cells showing GFP expression was calculated on a per well basis (Fig S5). At 10 ng/ml TNF α the near maximum GFP expression was observed. CAPE was added at different concentrations to wells containing 10 ng/ml TNF α. The maximum inhibition of TNF α mediated GFP expression was observed at a concentration of 10 µg/ml CAPE. At these concentrations the mean percent GFP expression of the TNF α positive control group was 74.1 with a standard deviation of 2.76. With the addition of 10 µg/ml CAPE the mean percent GFP expression was 24.3 with a standard deviation of 5.01. The Z prime score based on these values is 0.61 (Fig S5). (1)

### 16s PCR Analysis and Data Processing

1 100 ng of cosmid clone DNA from each of the three patient libraries was mixed with 0.5  $\mu$ M primers, 1x Buffer  
2 G (Epicentre), 0.2 U Phusion polymerase, 2.5U rTaq polymerase (New England Biolabs), 3% DMSO. Primers  
3 targeting the V4 rRNA region were used (F primer - 5'AYTGGYDTAAGNG, R primer -  
4 5'TACNVGGGTATCTAATCC). (2) 454 sequencing adapters and unique barcodes were attached for  
5 processing and sample identification. PCR conditions were 25 cycles of 10s at 98 °C, 30s at 55 °C, 30s at 72  
6 °C followed by an extension step for 5min at 72 °C. PCR reactions were run on crystal violet stained gels and  
7 amplicons of the correct size were gel purified (Qiagen MinElute). Purified PCR products were fluorometrically  
8 quantified (PicoGreen Quant-iT, Invitrogen) and analyzed via capillary electrophoresis (DNA 7500; Agilent  
9 Technologies). Each sample was diluted to  $\sim 10^9$  molecules/ $\mu$ L. All samples were pooled for emulsion PCR  
0 and pyrosequenced (454 GS-FLX Titanium). Raw 454 reads were processed using QIIME. (3) The general  
1 workflow is summarized as follows: 1) sequences were denoised and quality filtered. 2) OTUs were assigned  
2 at 97% identity and representative sequences identified in each OTU. 3) Each OTU representative sequence  
3 was assigned taxonomy using Greengenes. 4) Per patient sample OTU tables were summarized by taxonomy  
4 and diversity statistics calculated.

#### 6 Subcloning of Cbeg12-1

7 The following primers were used to PCR amplify the Cbeg12-1 gene from cosmid Cbeg12 (35i19): F primer -  
8 GATCAGTACTGCTTGGTAAACAGGAGGTTT R primer - GATCAGTACTTTATTTGGTCAGTATGGGAT. The  
9 resulting PCR product was digested with *Sca*I and ligated into *Sca*I digested pJWC1 vector.

#### 1 Isolation of N-acyl amino acids from Cbeg 12

2 *E. coli* transformed with the Cbeg12-1 (35i19) cosmid was and a negative control culture (*E. coli* EC100 with  
3 empty pJWC1 cosmid vector) were grow in LB medium supplemented with tetracycline (15  $\mu$ g/ml) (4 days, 250  
4 rpm, 30 °C). Both cultures were extracted with ethyl acetate 1:1 and the resulting extracts were dried in vacuo.  
5 Extracts were fractionated by silica gel flash column chromatography (chloroform:methanol (0.1% TFA): 99:1  
6 isocratic for 5 min, gradient from 99:1 to 70:30 over 10 min). Similar fractions were combined based on TLC  
7 analysis and then combined fractions were assays for ability to induced GFP expression in HEK293:NF-  
8  $\kappa$ B:GFP cells (Fig S4). Only the combined fraction containing clones specific metabolites was found to induce

1 GFP. Compounds **1-4**, which were not seen in the corresponding fraction from the vector control culture, were  
2 purified from this Cbeg12-1 fraction using reversed phase HPLC (Waters XBridge<sup>™</sup> C<sub>18</sub>, 10 X 250 mm, 3  
3 ml/min, isocratic 70% acetonitrile with 0.1% TFA) (Fig S4). Purified **1-4** were resuspended in DMSO and  
4 assayed for the ability to induce GFP expression in HEK293:NF-κB:GFP cells.

#### 5 6 Structure determination of compounds **1 - 4**

7 NMR spectroscopic data for naturally isolated compounds **1 – 4** appears in Figure S6, Table S3.

8  
9 Structures of compounds **1 – 4** were determined by spectroscopic analysis including MS, and 1D and 2D NMR.

0 Compound **1** was isolated as the major compound. HRMS calculated for compound **1** C<sub>18</sub>H<sub>36</sub>NO<sub>5</sub><sup>+</sup> 330.26,  
1 found: 330.2859. The odd molecular weight suggested that compound **1** contains an odd number of nitrogens.

2 Analysis of the <sup>1</sup>H NMR spectrum of **1** in combination with DEPT-Q and HSQC spectra indicated the presence  
3 of NH (δ<sub>H</sub> 8.23, t), oxygenated methine (δ<sub>H</sub> 3.78), two diastereotopic methylene (δ<sub>H</sub> 3.78 and 3.85; δ<sub>H</sub> 2.19 and  
4 2.23) and largely overlapped aliphatic methylene (δ<sub>H</sub> 1.24) and methyl (δ<sub>H</sub> 3.78 and 3.85) protons. Analysis of  
5 the COSY spectrum identified the presence of two separate spin systems. A COSY correlation between NH  
6 and diastereotopic protons (H<sub>2</sub>-2) together with an HMBC correlation from H<sub>2</sub>-2 protons to a carbonyl carbon C-1  
7 suggested that the first spin system arises from a glycine moiety. The presence of a fatty acid moiety was  
8 apparent due to the appearance of a large methylene envelope at 1.24 ppm as well as a triplet methyl signal  
9 (H<sub>3</sub>-18, δ<sub>H</sub> 1.85). Sequential COSY correlations were observed between H<sub>2</sub>-4/H-5/H<sub>2</sub>-6/H<sub>2</sub>-7, and COSY  
0 correlations between H-5 and OH indicated H-5 to be hydroxylated. In the COSY spectrum H<sub>2</sub>-7 further  
1 correlated with the largely overlapped aliphatic signals at 1.24 ppm, deducing the second spin system as a  
2 hydroxylated fatty acid moiety. The glycine and hydroxylated fatty acid moiety can be combined through an  
3 amide bond based on HMBC correlations from H<sub>2</sub>-2 and NH to C-3, suggesting compound **1** to be an *N*-acyl  
4 glycine. Finally, the length of a fatty acid moiety was determined as C<sub>18</sub> based on the predicted molecular  
5 formula. Thus, the structure of **1** was determined to be 3-OH-*N*-palmitoyl glycine.

6  
7 HRMS calculated for compound **2** C<sub>18</sub>H<sub>34</sub>NO<sub>5</sub><sup>+</sup> 328.24, found: 328.2657. The <sup>1</sup>H and <sup>13</sup>C NMR spectra of **2** are  
8 almost identical to those of **1** except for the presence of signals for double bonds in the spectra of **2**. The

1 molecular weight difference of two suggested the same carbon chain length between compounds **1** and **2**.  
2 COSY correlations between H-11/H-12 and H-10/H-13, and between H-10/H-13 and a largely overlapped  
3 methylene signals indicated that a double bond is located on a fatty acid chain. The position of the double  
4 bond was not be determined by a spectroscopic methods. The position of the double bond is predicted based  
5 on the position that is most frequently seen in *E. coli* lipids and has been seen in all previous *N*-acyl amino  
6 acids characterized produced by *E. coli*. (4)

7  
8 HRMS calculated for compound **3**  $C_{20}H_{38}NO_5^+$  356.27, found: 356.2975. The  $^1H$  NMR spectrum of **3** is similar  
9 to that of **2** except for the integration of the methylene envelope at  $\delta_H$  1.24. The  $^{13}C$  NMR spectrum of **3**  
0 displayed additional signals around  $\delta_C$  29.0. This together with a molecular weight difference of twenty eight  
1 indicated a fatty acid moiety of **3** to be a 3-hydroxylated oleic acid (C18:1) instead of a 3-hydroxylated palmitic  
2 acid that is seen in **2**.

3  
4 HRMS calculated for compound **4**  $C_{16}H_{32}NO_5^+$  302.23, found: 302.2501. The  $^1H$  spectrum of **4** is similar to that  
5 of **1**, however the integration of methylene envelope. The molecular weight difference of twenty-eight between  
6 **1** and **4** suggested the fatty acid moiety of **4** as a 3-hydroxylated myristic acid instead of a 3-hydroxylated  
7 palmitic acid found in **1**.

#### 8 9 HEK293:NF- $\kappa$ B:GFP bioassay of purified *N*-acyl-glycines

0 Each purified clone specific metabolite was resuspended at 0.45 mg/25  $\mu$ l methanol. 1  $\mu$ l of this dilution was  
1 added to 80  $\mu$ l of sterile spent culture media from negative control clones and the mixture was added to 100  $\mu$ l  
2 of HEK239:NF- $\kappa$ B:GFP reporter cells in a 96-well microplate (8,000 cells per well). Each purified compound (**1**  
3 - **4**) was assayed at 100  $\mu$ g/ml in the first well of microtiter plate and then serially diluted (two fold/well) across  
4 the plate. GFP expression was monitored in the same fashion as described above.

#### 5 6 *Bacteroides vulgatus* ATCC 8482 culture broth analysis

7 *B. vulgatus* was purchased from ATCC and grown for 14 days under anaerobic conditions in LY-BHI media.  
8 The mature *B. vulgatus* culture was extracted 1:1 with ethyl acetate under neutral and acidic conditions (pH 2-

3). Crude extracts were separated by reversed phase flash chromatography [water:methanol gradient 80:20 to 0:100 (0.1% TFA)]. Fractions were analyzed by reversed phase LCMS (Waters XBridge™) using a binary solvent system (A/B: water/acetonitrile with 0.1% formic acid) from 5% solvent B to 95% solvent B over 40 minutes. Purified **1** was run under the same conditions as a control.

#### Synthesis of *N*-acyl amino acid derivatives

Glycine was purchased from Fisher Scientific Inc. (Waltham, MA). (Benzotriazol-1-yloxy) tripyrrolidinophosphonium hexafluorophosphate (PyBOP) and 6-Chloro-1-hydroxybenzotriazole (Cl-HOBt) were purchased from Peak Polypeptide Biosystems (Louisville, KY). All other reagents and solvents were purchased from Sigma-Aldrich (St. Louis, MO).

***N*-(3-hydroxypalmitoyl)glycine.** This compound was synthesized based on the same procedure as described for **1**. The desired product eluted at 76% solvent B and 0.7mg of purified material was obtained after lyophilization. NMR (CD<sub>3</sub>OD-*d*<sub>4</sub>): δ 0.90 (3H, t, *J* = 7.1 Hz), 1.1 ~ 1.3 (22H, m), 1.4 ~ 1.5 (4H, m), 2.33 (2H, dd, *J* = 14.2, 8.4 Hz), 2.38 (2H, dd, *J* = 14.2, 4.3 Hz), 3.80 (1H, d, 17.4 Hz), 3.96 (1H, m). HRMS calculated for C<sub>18</sub>H<sub>36</sub>NO<sub>5</sub><sup>+</sup> 330.26, found: 330.2550

***N*-(3-hydroxydecanoyl)glycine.** This compound was synthesized based on the same procedure as described for **1**. The desired product eluted at 43% solvent B and 0.9mg of purified material was obtained after lyophilization. <sup>1</sup>H NMR (CD<sub>3</sub>OD-*d*<sub>4</sub>): δ 0.90 (3H, t, *J* = 7.2 Hz), 1.1 ~ 1.3 (8H, br), 1.4 ~ 1.5 (4H, m), 2.30 (2H, dd, *J* = 14.1, 8.5 Hz), 2.37 (2H, dd, *J* = 14.1, 4.0 Hz), 3.77 (1H, d, 17.4 Hz), 3.96 (1H, m). HRMS calcd for C<sub>12</sub>H<sub>24</sub>NO<sub>5</sub><sup>+</sup> 246.16, found: 246.1530

***N*-(3-hydroxypalmitoyl)tyrosine.** dl-3-Hydroxypalmitic acid (10.0 mg, 37 μmol) was dissolved in 400 μL of anhydrous DMF and activated by PyBOP (19.1 mg, 37 μmol), Cl-HOBt (6.2 mg, 37 μmol), and DIPEA (37 μL, 2 M solution in NMP) for 10 min. The activated fatty acid was added to a solution of tyrosine (13.3 mg, 74 μmol) in 400 μL DMF premixed with DIPEA (74 μL, 2 M solution in NMP) and shaken at 200 rpm in a 37 °C incubator for 16 h. After removal of solvent by speed-vacuum, the resulting material was dissolved in methanol and

1 purified by HPLC using a binary solvent system (A/B: water/acetonitrile containing with 0.1% formic acid). The  
2 desired product eluted at 76% solvent B and 0.4mg of purified material was obtained after lyophilization. <sup>1</sup>H  
3 NMR (CD<sub>3</sub>OD-*d*<sub>4</sub>): δ 0.90 (3H, t, *J* = 7.1 Hz), 1.1 ~ 1.3 (22H, br), 1.4 ~ 1.5 (4H, m), 2.26 (2H, m), 2.85 (1H, m),  
4 3.11 (1H, m), 3.85 (1H, m), 4.50 (1H, m), 6.66 (2H, d, *J* = 8.1 Hz), 7.05 (2H, d, *J* = 8.1 Hz). HRMS calcd for  
5 C<sub>25</sub>H<sub>42</sub>NO<sub>5</sub><sup>+</sup> 436.3057, found: 436.2973

## 7 **GPCR Screen**

8 Commendamide (natural and synthetic), natural products **2** and **4** and all synthesized acyl amide derivatives  
9 were resuspended at 10 mM in DMSO and sent to DiscoverX for assay. Assays were performed per  
0 DiscoverX. Initial screen against GPCR library was done only with commendamide at 10 μM concentration.  
1 After identification of GPR 132/G2A activation by commendamide, other acyl amides were similarly screened  
2 for G2A receptor activation.

## 4 **References:**

- 6 1. Shun TY, Lazo JS, Sharlow ER, & Johnston PA (2011) Identifying actives from HTS data sets:  
7 practical approaches for the selection of an appropriate HTS data-processing method and quality  
8 control review. *Journal of biomolecular screening* 16(1):1-14.
- 9 2. Cole JR, *et al.* (2009) The Ribosomal Database Project: improved alignments and new tools for  
0 rRNA analysis. *Nucleic acids research* 37(Database issue):D141-145.
- 1 3. Caporaso JG, *et al.* (2010) QIIME allows analysis of high-throughput community sequencing data.  
2 *Nat Methods* 7(5):335-336.
- 3 4. Brady SF, Chao CJ, & Clardy J (2002) New natural product families from an environmental DNA  
4 (eDNA) gene cluster. *Journal of the American Chemical Society* 124(34):9968-9969.
- 5 5. Petersen TN, Brunak S, von Heijne G, & Nielsen H (2011) SignalP 4.0: discriminating signal  
6 peptides from transmembrane regions. *Nat Methods* 8(10):785-786.
- 7

## 8 **Figure Legends:**

9 **Fig. S1. ppGpp synthetase.** Nine different effector genes are predicted to be ppGpp synthetases. (A) Effector  
0 gene protein sequences were aligned to each other with MUSCLE (Macvector). ppGpp synthetase genes  
1 have varying degrees of identity to each other. (B) A phylogenetic tree prepared of effector genes using the  
2 UPMGA method and bootstrapped 999 times. ppGpp synthetase genes cluster according to species.  
3  
4  
5  
6





1 (CAPE 10  $\mu\text{g/ml}$ ) of HEK293:NF-kB:GFP cells (Table) a Z prime score is calculated with a value of 0.61. (C)  
2 Each microplate was arranged as outlined. The yellow column contained 10 ng/ml of TNF  $\alpha$  to ensure  
3 HEK293:NF-kB:GFP cells continued to respond to stimuli by visual inspection. Blue columns are negative  
4 controls and the red line shows excluded wells due to poor reproducibility of edge wells.

5

6 **Fig. S6: NMR Spectra for Compounds 1 – 4.**

7

8

9

1 **Figure S1**

|       | 3b03 | 15d03 | 15m04 | 24i11 | 1i11 | 22g15 | 21f12 | 37b14 | 40k7 |
|-------|------|-------|-------|-------|------|-------|-------|-------|------|
| 3b03  | 100  | 78    | 96    | 87    | 59   | 54    | 78    | 91    | 98   |
| 15d03 | 88   | 100   | 77    | 76    | 59   | 54    | 100   | 77    | 77   |
| 15m04 | 98   | 88    | 100   | 87    | 59   | 54    | 77    | 91    | 97   |
| 24i11 | 94   | 88    | 94    | 100   | 60   | 55    | 76    | 88    | 88   |
| 1i11  | 75   | 76    | 76    | 76    | 100  | 90    | 59    | 60    | 59   |
| 22g15 | 69   | 70    | 69    | 69    | 99   | 100   | 55    | 54    | 54   |
| 21f12 | 88   | 100   | 88    | 88    | 76   | 70    | 100   | 77    | 77   |
| 37b14 | 95   | 89    | 94    | 94    | 76   | 70    | 89    | 100   | 91   |
| 40k7  | 99   | 99    | 94    | 93    | 76   | 69    | 88    | 96    | 100  |

**B**

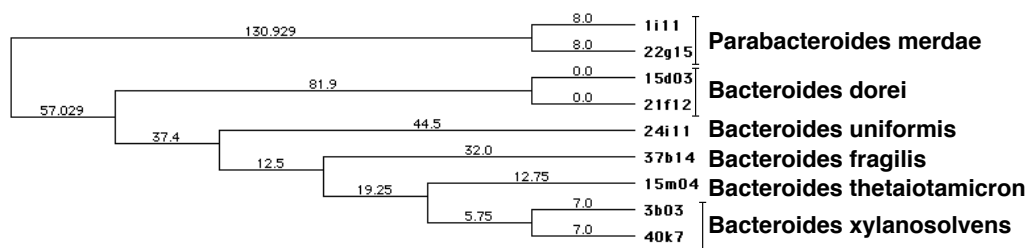

2  
3  
4

1 **Figure S2**

**A**

**Cbeg4**

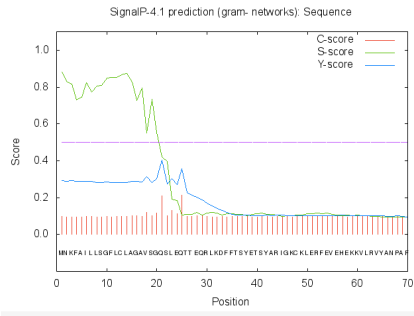

**Cbeg5**

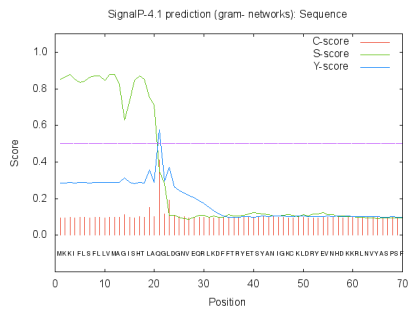

**B**

**Cbeg6**

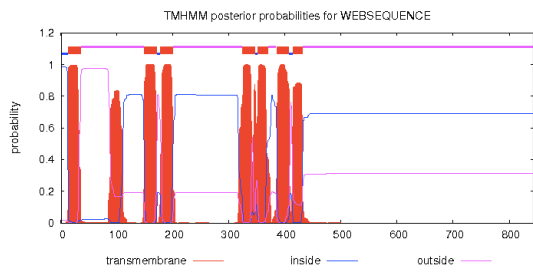

**Roseburia intestinalis**

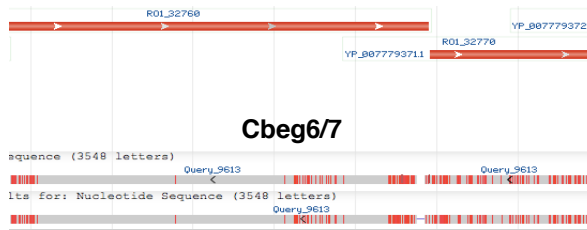

2

3

4

1 **Figure S3**

**A**

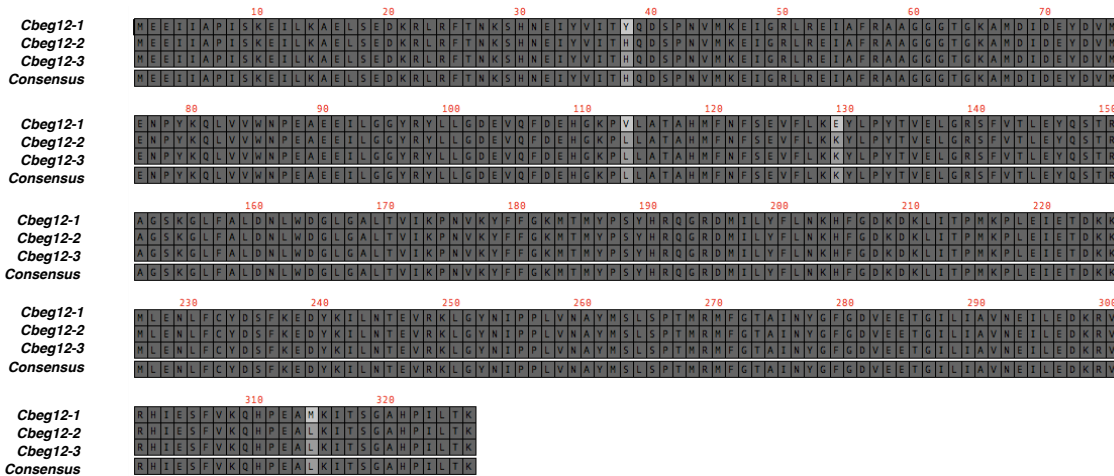

**B**

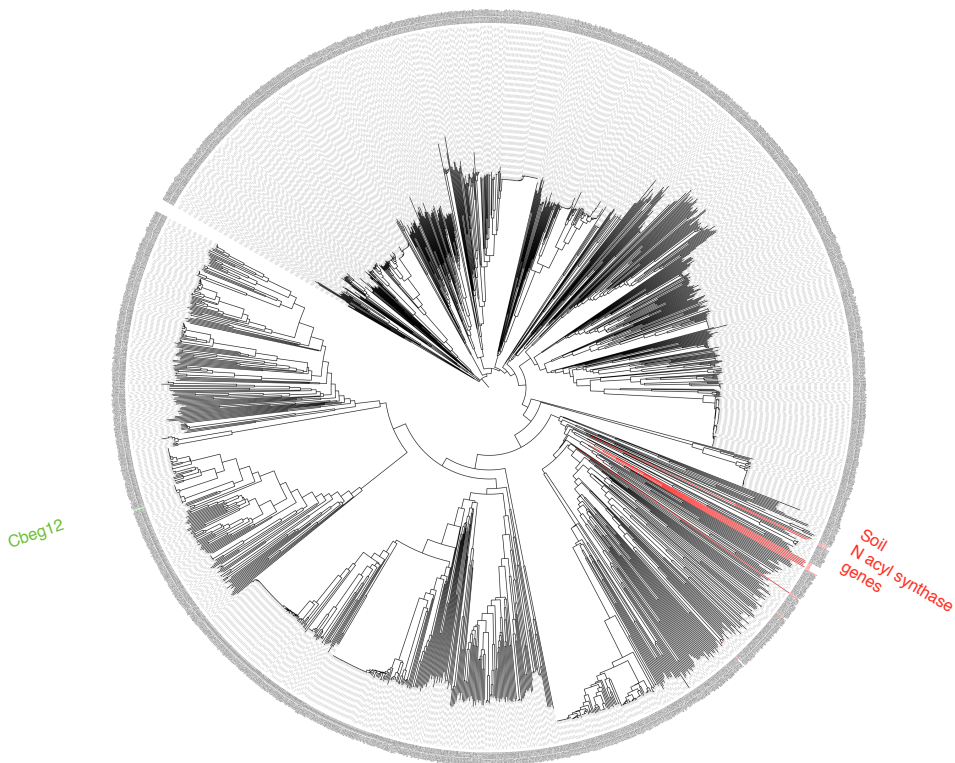

2

3

4

1 **Figure S4**

2

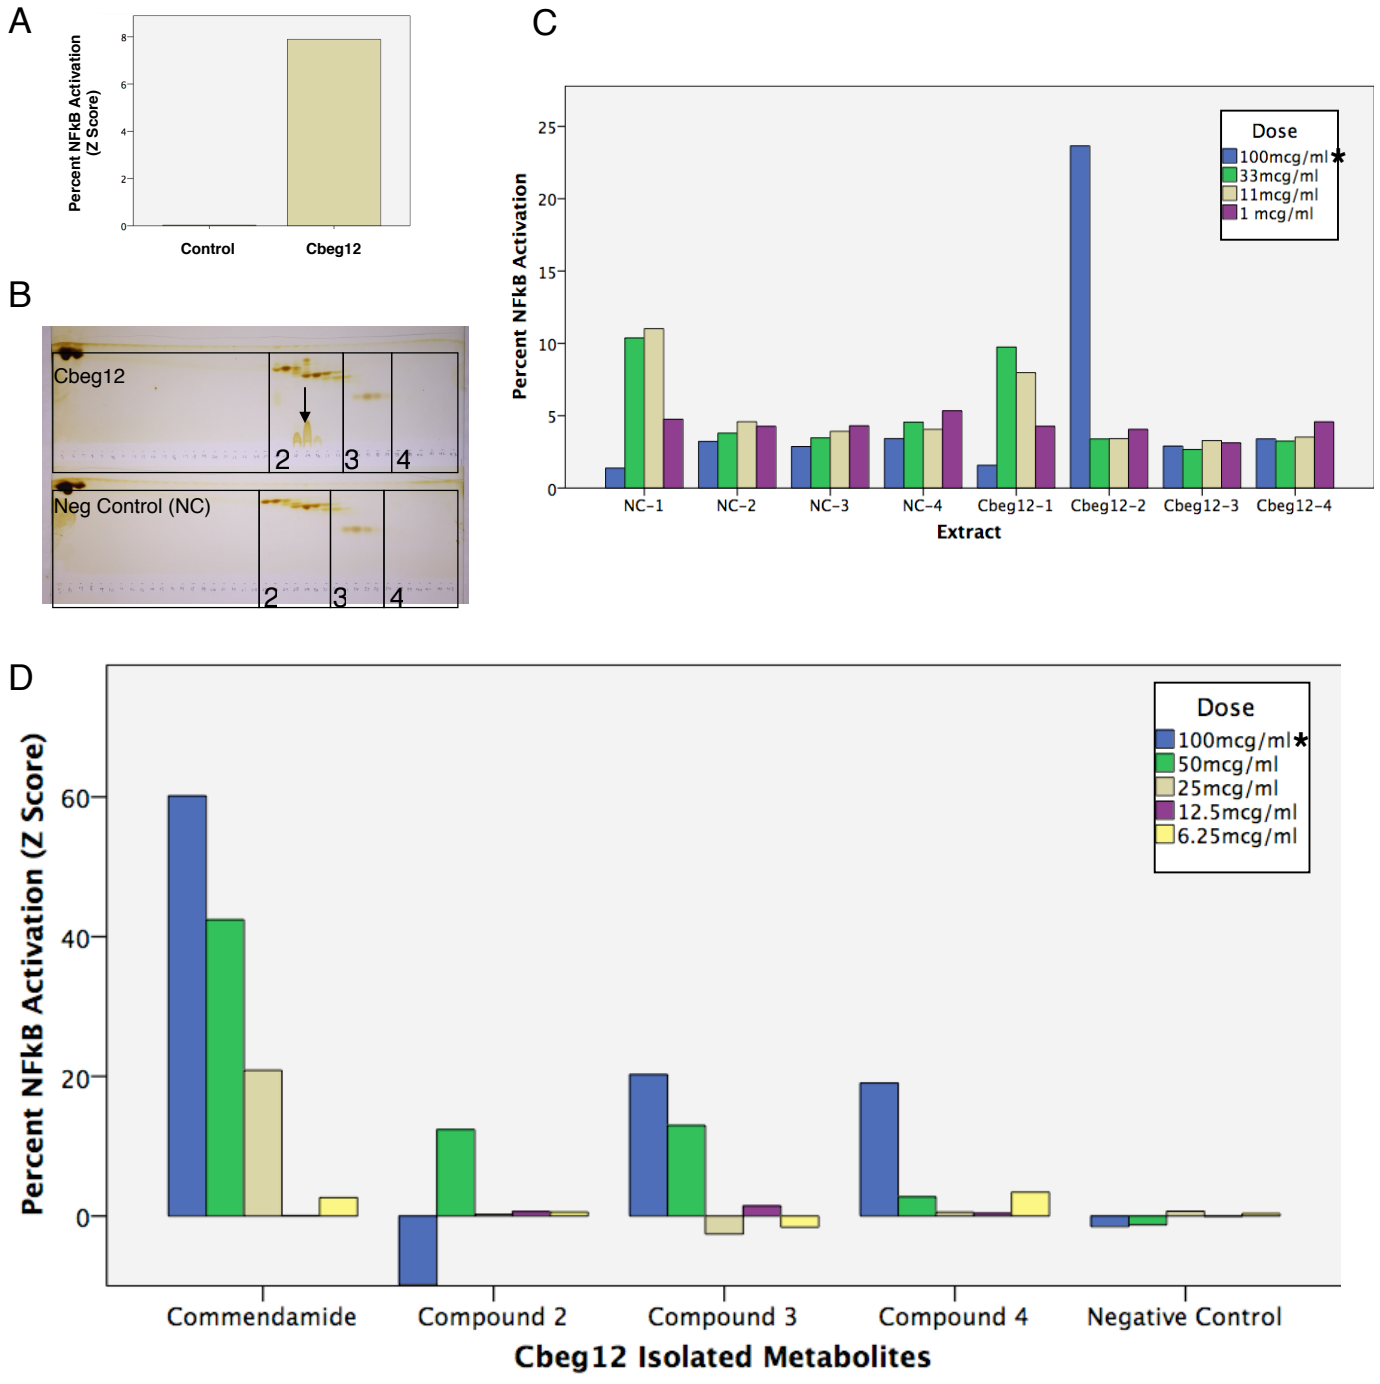

3

4

1 **Figure S5**

2

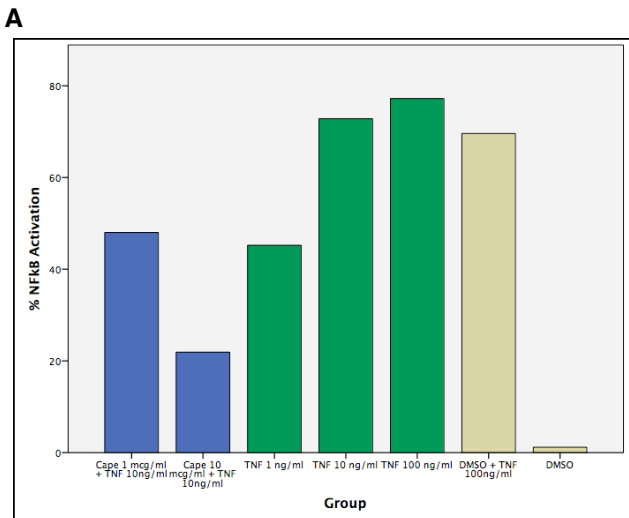

**B**

|                                     | Statistic                                    | Std. Error |         |
|-------------------------------------|----------------------------------------------|------------|---------|
| <b>Cape 10 mcg/ml + TNF 10ng/ml</b> | Mean                                         | 21.8994    | 2.08894 |
|                                     | 95% Confidence Interval Lower Bound for Mean | 17.6390    |         |
|                                     | Upper Bound                                  | 26.1599    |         |
|                                     | 5% Trimmed Mean                              | 21.9716    |         |
|                                     | Median                                       | 22.6405    |         |
|                                     | Variance                                     | 139.637    |         |
|                                     | Std. Deviation                               | 11.81682   |         |
|                                     | Minimum                                      | 0.00       |         |
|                                     | Maximum                                      | 44.00      |         |
|                                     | Range                                        | 44.00      |         |
|                                     | Interquartile Range                          | 11.05      |         |
| Skewness                            | -.506                                        | .414       |         |
| Kurtosis                            | .021                                         | .809       |         |
| <b>TNF 10 ng/ml</b>                 | Mean                                         | 72.8115    | .98159  |
|                                     | 95% Confidence Interval Lower Bound for Mean | 70.8095    |         |
|                                     | Upper Bound                                  | 74.8135    |         |
|                                     | 5% Trimmed Mean                              | 73.2752    |         |
|                                     | Median                                       | 73.3298    |         |
|                                     | Variance                                     | 30.833     |         |
|                                     | Std. Deviation                               | 5.55271    |         |
|                                     | Minimum                                      | 53.66      |         |
|                                     | Maximum                                      | 81.67      |         |
|                                     | Range                                        | 28.01      |         |
|                                     | Interquartile Range                          | 4.79       |         |
| Skewness                            | -1.587                                       | .414       |         |
| Kurtosis                            | 4.182                                        | .809       |         |

$$Z' = \frac{3(\sigma_p + \sigma_n)}{|\mu_p + \mu_n|} = 0.61$$

**C**

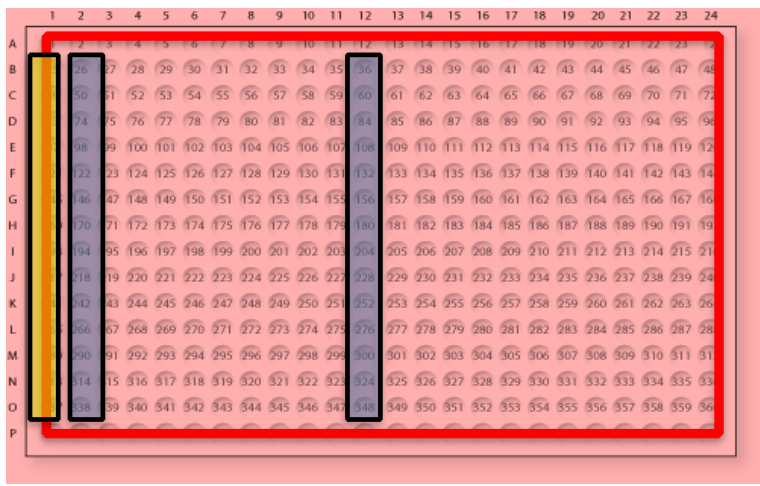

3  
4  
5

1 **Figure S6**

2

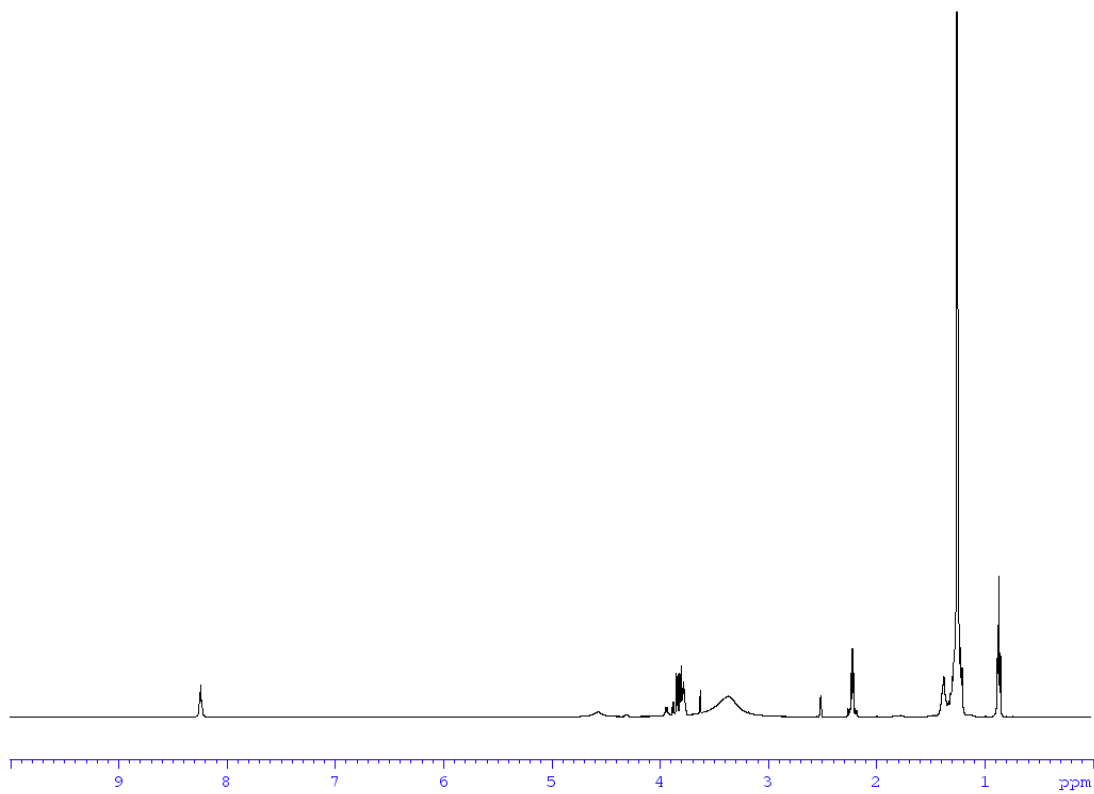

3

4

$^1\text{H}$  NMR spectrum (DMSO- $d_6$ , 500 MHz) of compound **1**.

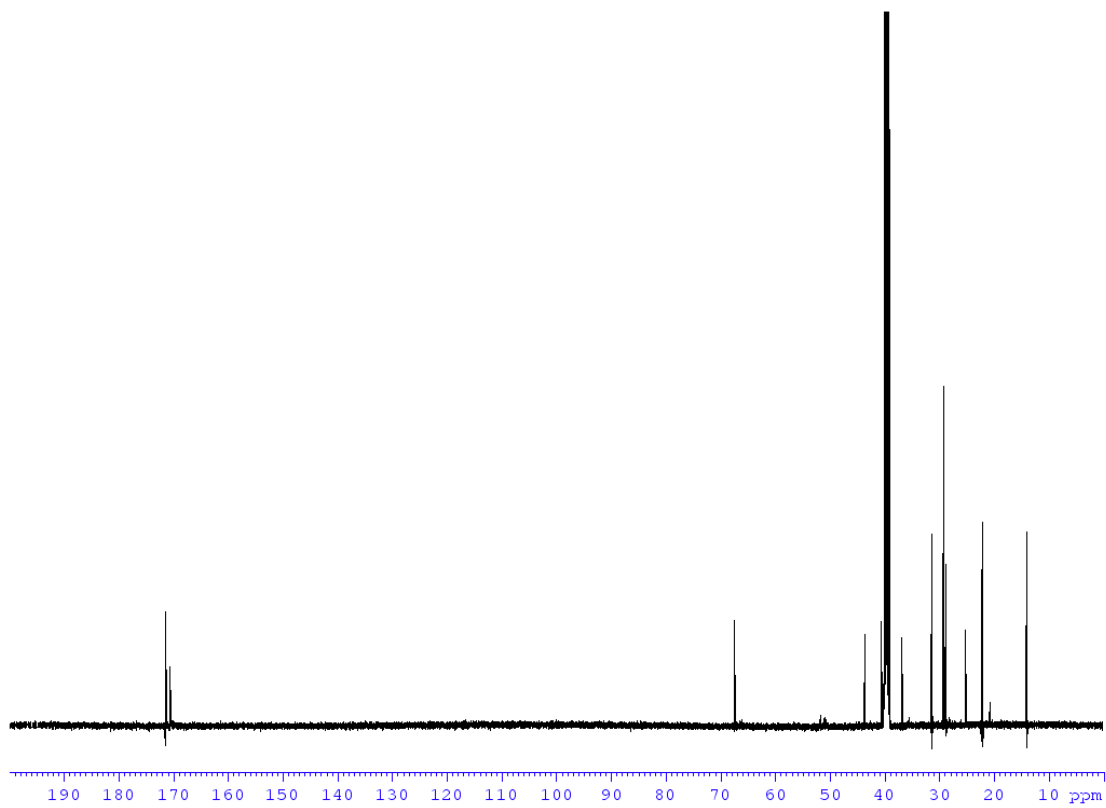

5

6

$^{13}\text{C}$  NMR spectrum (DMSO- $d_6$ , 125 MHz) of compound **1**.



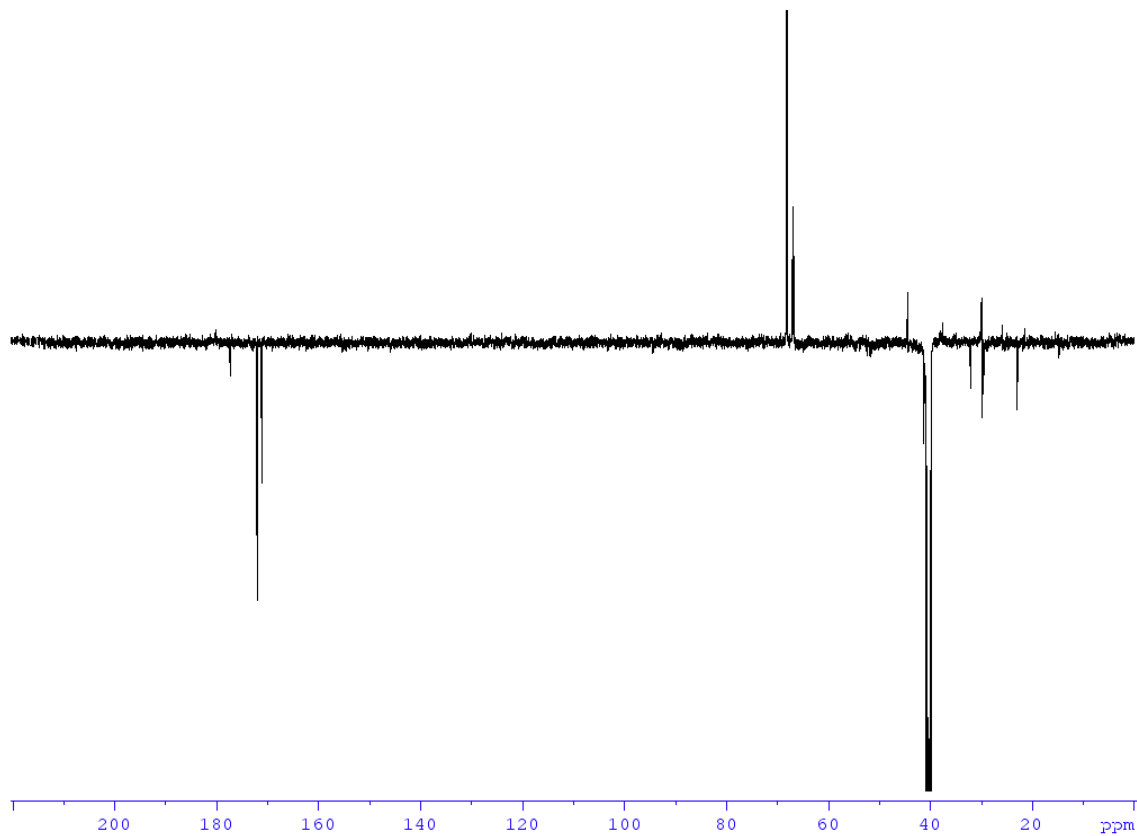

1  
2

DEPT-Q spectrum (DMSO- $d_6$ , 125 MHz) of compound **1**.

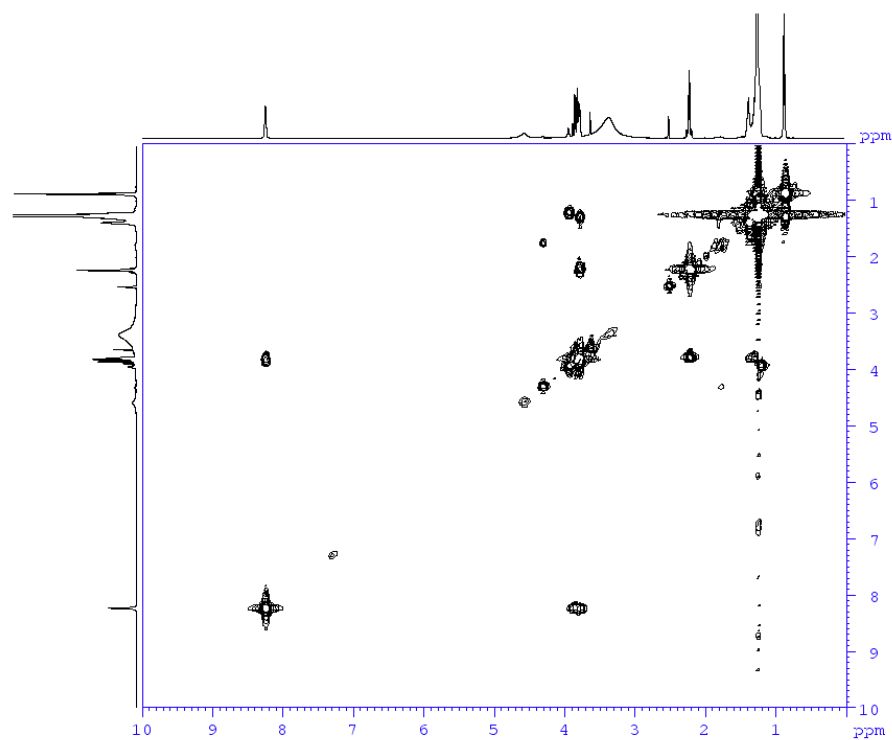

3  
4

COSY spectrum (DMSO- $d_6$ , 500 MHz) of compound **1**.

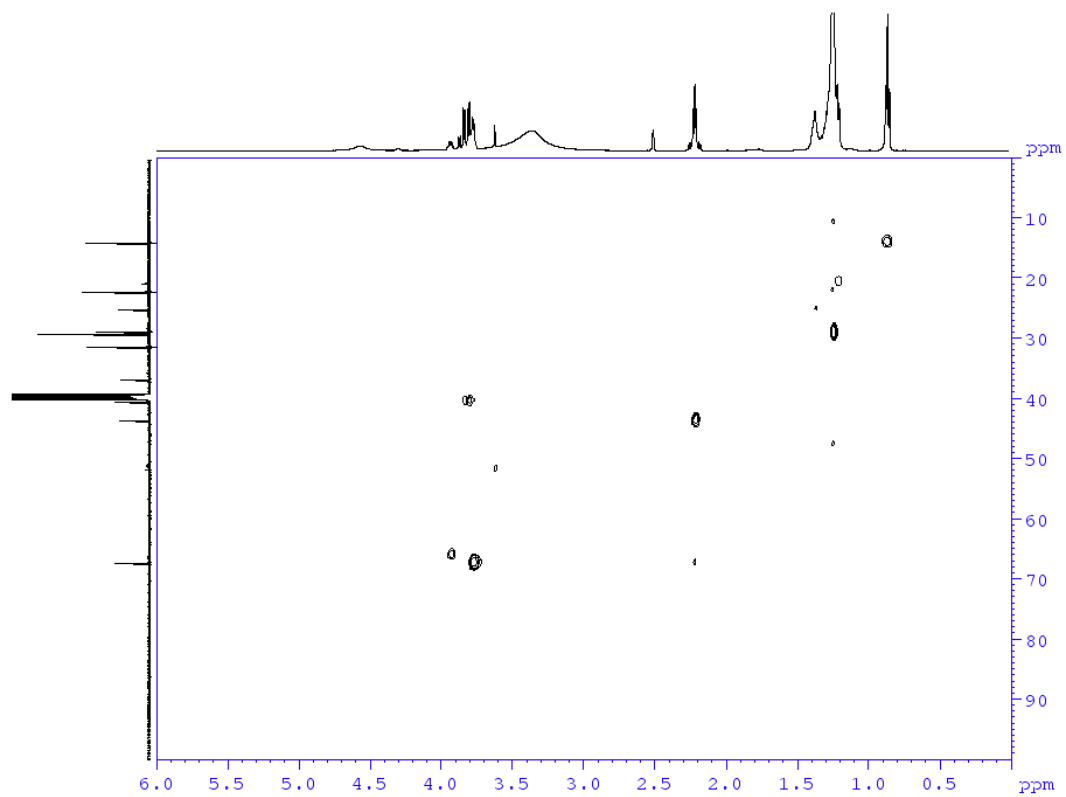

1  
2 HMQC spectrum (DMSO-*d*<sub>6</sub>, 500 MHz) of compound **1**.

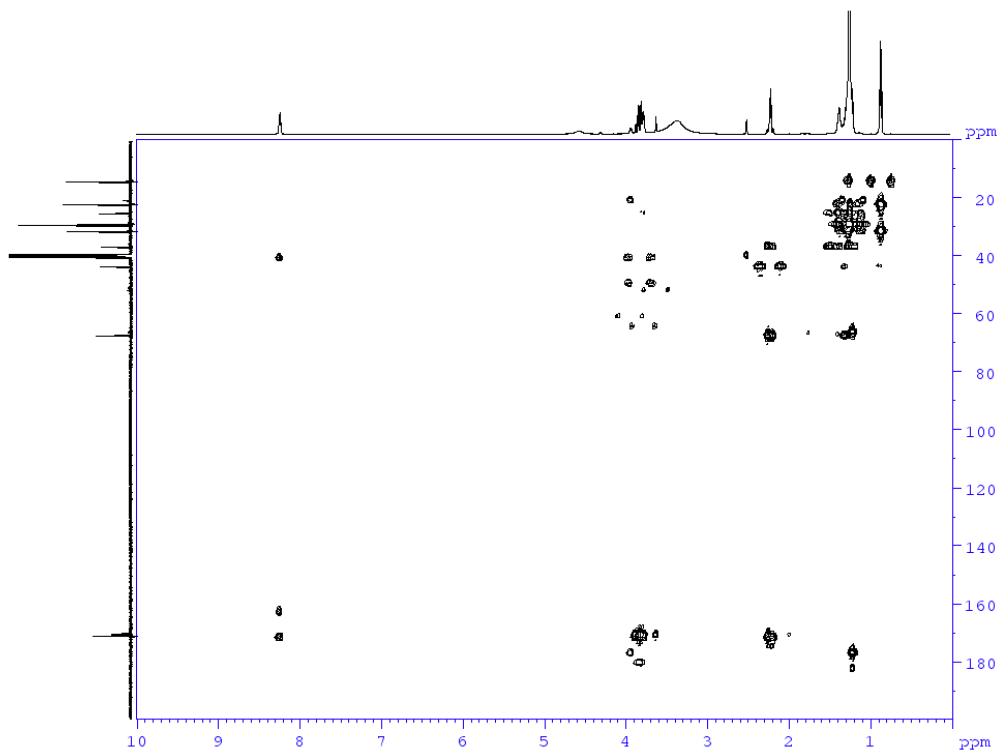

3  
4 HMBC spectrum (DMSO-*d*<sub>6</sub>, 500 MHz) of compound **1**.

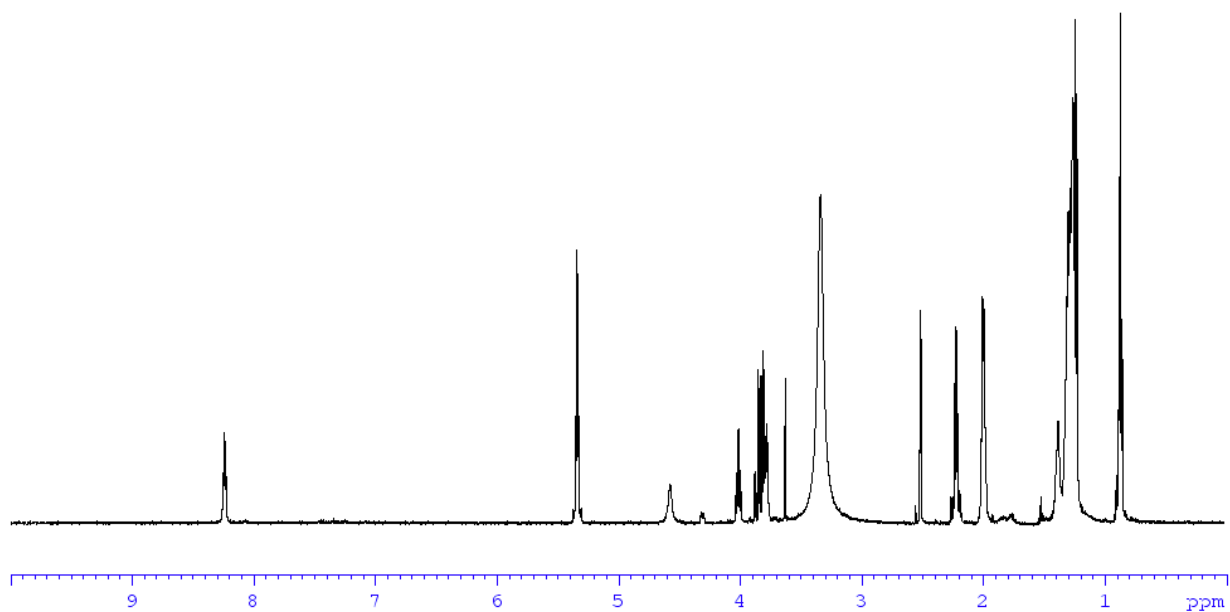

1  
2  $^1\text{H}$  NMR spectrum (DMSO- $d_6$ , 500 MHz) of compound **2**.

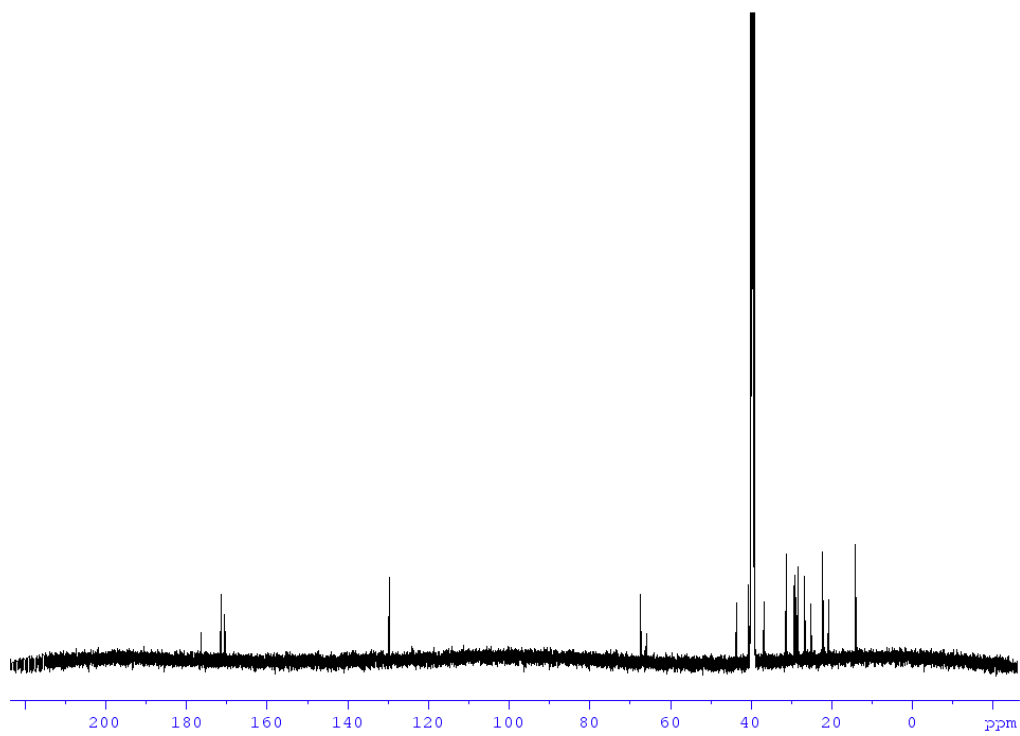

3  
4  $^{13}\text{C}$  NMR spectrum (DMSO- $d_6$ , 125 MHz) of compound **2**.

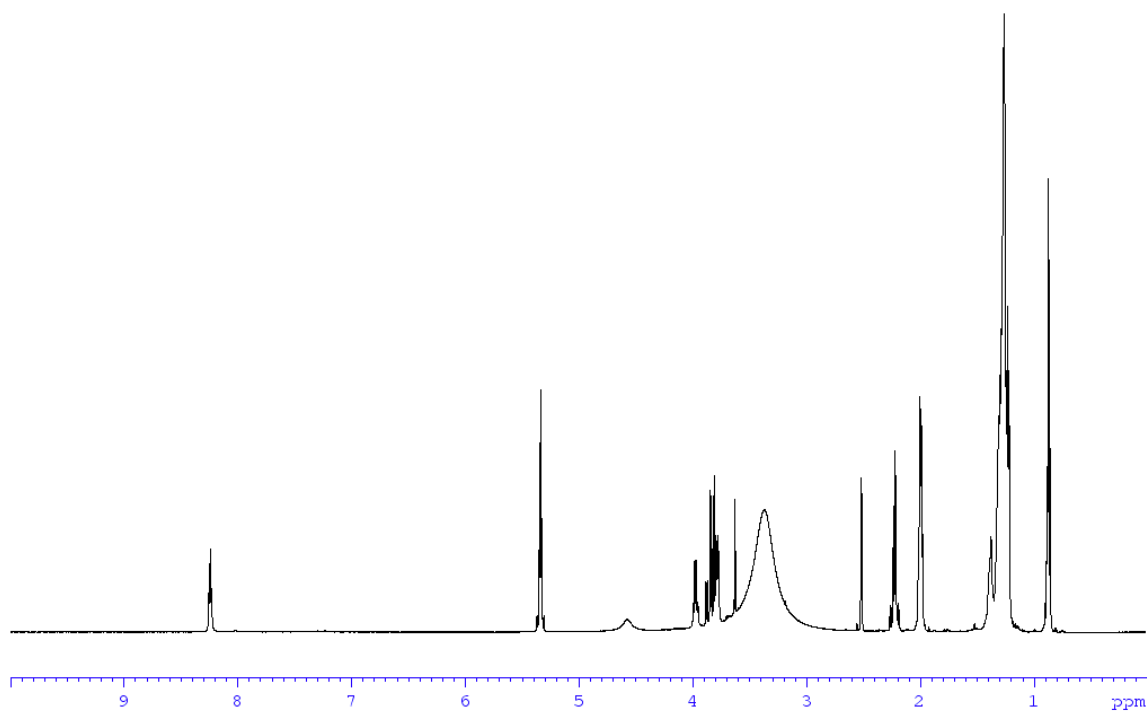

1  
2

$^1\text{H}$  NMR spectrum (DMSO- $d_6$ , 500 MHz) of compound **3**.

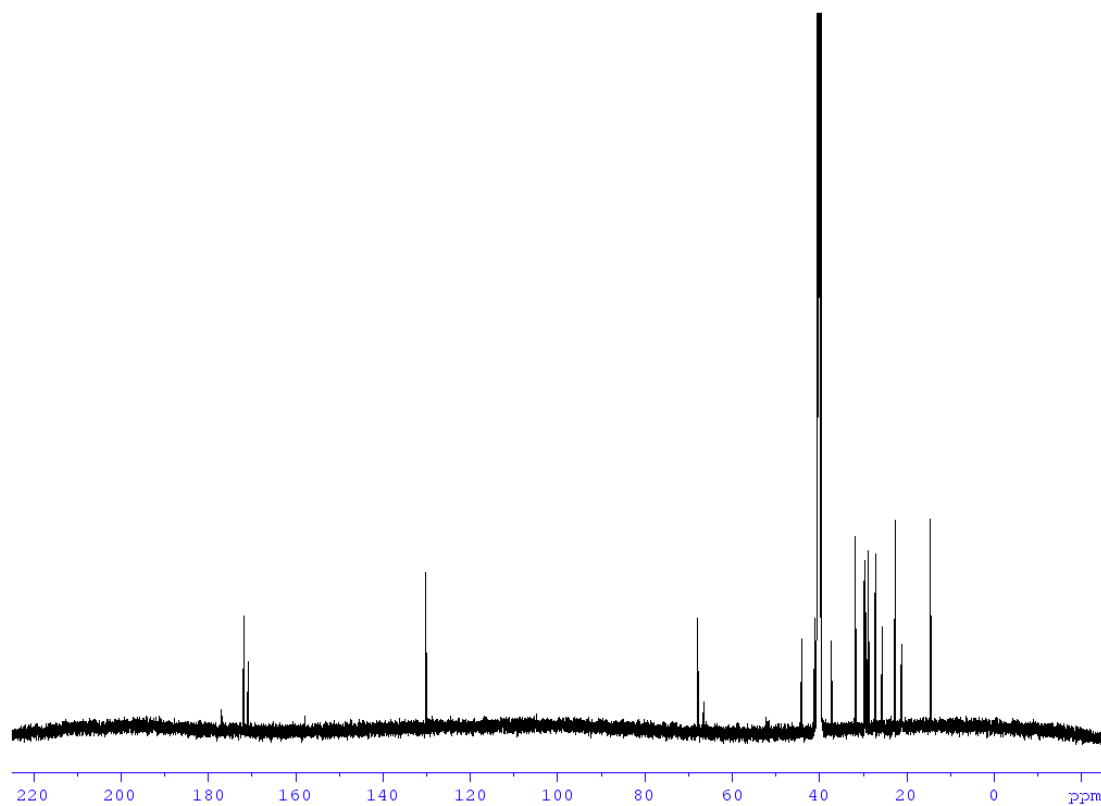

3  
4

$^{13}\text{C}$  NMR spectrum (DMSO- $d_6$ , 125 MHz) of compound **3**.

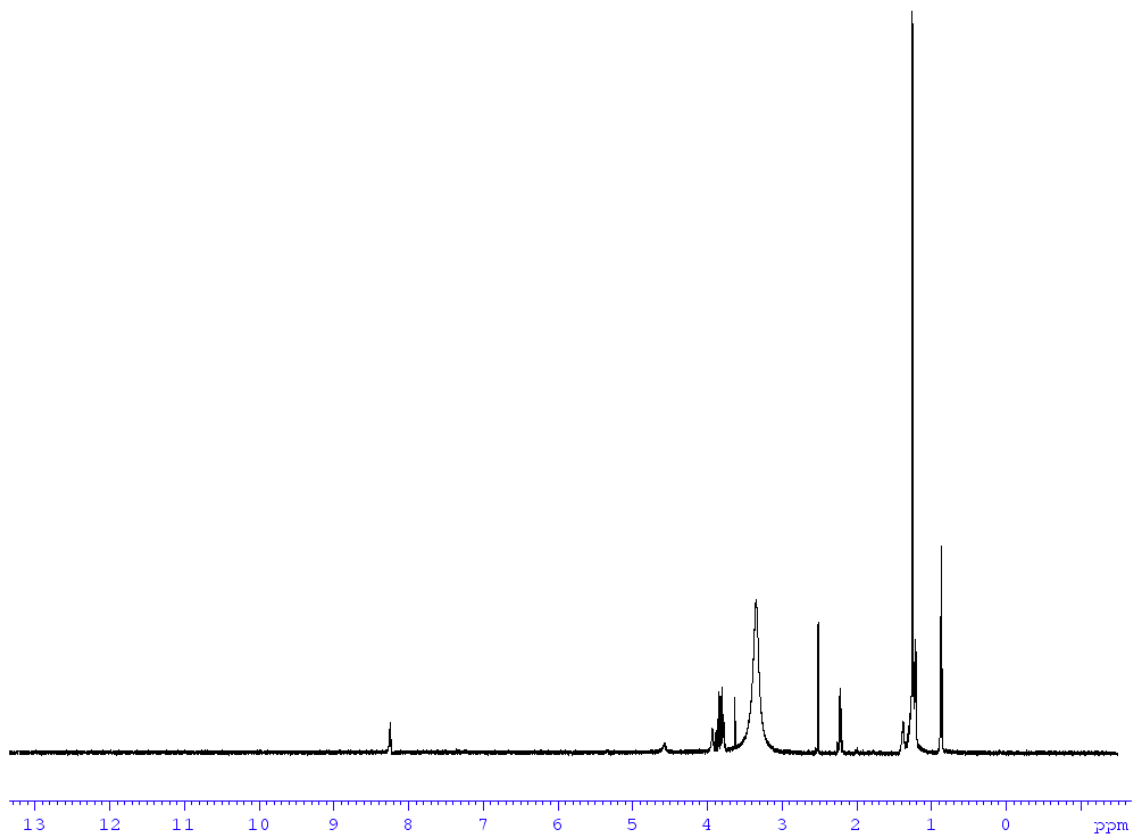

1

2

$^1\text{H}$  NMR spectrum (DMSO- $d_6$ , 500 MHz) of compound **4**.

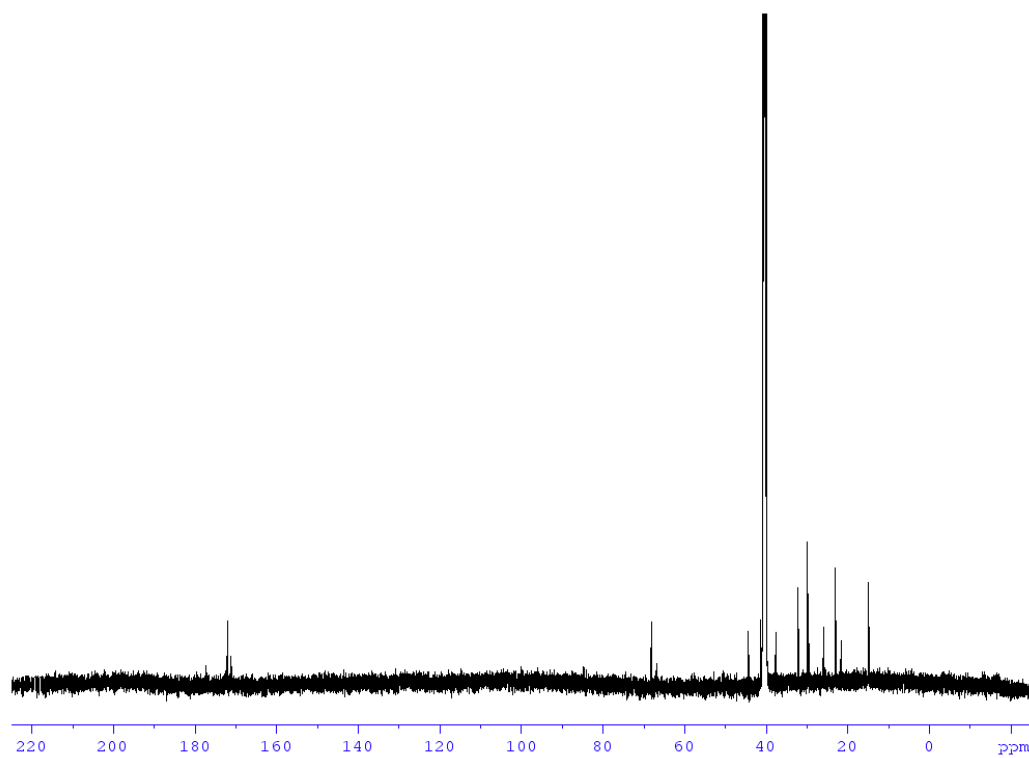

3

4

$^{13}\text{C}$  NMR spectrum (DMSO- $d_6$ , 125 MHz) of compound **4**.

5

1 **Table S1**

2  
3

4 **Table S1. Patient demographics**

5

|                          | <b>Crohns</b>             | <b>Ulcerative Colitis</b> | <b>Healthy Control</b> |
|--------------------------|---------------------------|---------------------------|------------------------|
| <b>Age (years)</b>       | 38                        | 34                        | 47                     |
| <b>Sex</b>               | M                         | M                         | F                      |
| <b>Medical History*</b>  | Seizures                  | NA                        | NA                     |
| <b>Disease Location</b>  | Ileocolonic, Perianal     | Pancolitis                | NA                     |
| <b>Disease Activity^</b> | Moderate                  | Moderate                  | NA                     |
| <b>Medication</b>        | Mesalamine, Levetiracetam | Mesalamine, Cortenema®    | None                   |

6  
7  
8  
9

^ Disease activity based on the Harvey Bradshaw Index (CD) and simple clinical colitis index (UC).  
\*All patients were free of abdominal surgery and antibiotic use > 6 months

0

1  
2

1 **Table S2**

2

3 **Table S2A. Cosmid and Cbeg sequence analysis.** Each unique cosmid and the effector gene(s) on that  
4 cosmid were independently aligned to the NCBI reference genome dataset using BlastN. For each unique  
5 cosmid (blue column) and effector gene (red column) the most similar reference genome is recorded. Each  
6 effector gene protein sequence was then aligned to the NCBI nr dataset (BlastP) to identify conserved domains  
7 (green column). Conserved domains are presented in descending order (N to C terminus of predicted protein)  
8 starting with conserved multidomains followed by individual domains.

9

| Cbeg                  | Reference Genome |           |                              |                              |                                      |                  | Effector Gene                   |                              |                                      |                  | Conserved Protein Domains |                                                       |                                         |                                        |                                            |                                                 |                                       |
|-----------------------|------------------|-----------|------------------------------|------------------------------|--------------------------------------|------------------|---------------------------------|------------------------------|--------------------------------------|------------------|---------------------------|-------------------------------------------------------|-----------------------------------------|----------------------------------------|--------------------------------------------|-------------------------------------------------|---------------------------------------|
|                       | Unique Cosmid    | Library   | Metagenomic Insert Size (bp) | Closest Reference Genome     | Reference genome %Coverage %Identity | Accession Number | Effector Gene Cluster Size (bp) | Closest Reference Genome     | Reference Genome %Coverage %Identity | Accession Number | Conserved Protein Domains | Conserved Domains                                     | pFAM                                    | SMART                                  | COG                                        | TIGR                                            | PRK                                   |
| ppGpp Synthetase Gene | 1111             | Library 1 | 29,226                       | Parabacteroides merdae       | 100% coverage 99% identity           | AAXE02000107.1   | 2295                            | Parabacteroides merdae       | 100% coverage 99% identity           | WP 005634199.1   | Multi-domain              | Metal Dependent Phosphorylase 2.41 e-6                | Metal Dependent Phosphorylase 3.35 e-35 | Metal Dependent Phosphorylase 3.25 e-8 | ppGpp Synthetase RelA/Spot 0e+00           | ppGpp Synthetase RelA/Spot 0e+00                | ppGpp Synthetase RelA/Spot 6.6 e-167  |
| ppGpp Synthetase Gene | 3b03             | Library 1 | 31,096                       | Bacteroides xylanisolvens    | 71% coverage 95% identity            | NC 021017.1      | 2241                            | Bacteroides ovatus           | 100% coverage 100% identity          | WP 004301386     | Multi-domain              | Metal Dependent Phosphorylase 3.80 e-6                | Metal Dependent Phosphorylase 2.72 e-54 | Metal Dependent Phosphorylase 2.35 e-6 | ppGpp Synthetase RelA/Spot 0e+00           | ppGpp Synthetase RelA/Spot 0e+00                | ppGpp Synthetase RelA/Spot 7.57 e-156 |
| 13                    | 4h09             | Library 1 | 24,150                       | Bacteroides uniformis        | 92% coverage 99% identity            | AGX01000019.1    | 1815                            | Bacteroides uniformis        | 100% coverage 100% identity          | WP 005833784.1   | Multi-domain              |                                                       |                                         |                                        | Mdb8 Phosphoglycerol transferase 1.56 e-41 |                                                 |                                       |
| 12-2                  | 10o08            | Library 1 | 33,711                       | Bacteroides dorei            | 99% coverage 99% identity            | CP 007619.1      | 981                             | Bacteroides dorei            | 100% coverage 100% identity          | WP 00784762.1    | Multi-domain              |                                                       |                                         |                                        |                                            |                                                 |                                       |
| ppGpp Synthetase Gene | 15d03            | Library 1 | 27,714                       | Bacteroides dorei            | 100% coverage 99% identity           | CP 007619.1      | 2271                            | Bacteroides dorei            | 100% coverage 100% identity          | WP 007836277.1   | Multi-domain              | Metal Dependent Phosphorylase 2.51 e-6                | Metal Dependent Phosphorylase 2.95 e-55 | Metal Dependent Phosphorylase 1.13 e-6 | ppGpp Synthetase RelA/Spot 0e+00           | ppGpp Synthetase RelA/Spot 0e+00                | ppGpp Synthetase RelA/Spot 2.84 e-166 |
| ppGpp Synthetase Gene | 15m04            | Library 1 | 26,634                       | Bacteroides thetaiotaomicron | 99% coverage 99% identity            | NC 004663.1      | 2244                            | Bacteroides thetaiotaomicron | 100% coverage 100% identity          | WP 008760913.1   | Multi-domain              | Metal Dependent Phosphorylase 7.72 e-7                | Metal Dependent Phosphorylase 1.72 e-54 | Metal Dependent Phosphorylase 3.7 e-7  | ppGpp Synthetase RelA/Spot 0e+00           | ppGpp Synthetase RelA/Spot 0e+00                | ppGpp Synthetase RelA/Spot 8.68 e-156 |
| ppGpp Synthetase Gene | 24i11            | Library 1 | 32,821                       | Bacteroides helcogenes       | 57% coverage 81% identity            | NC 014933.1      | 2259                            | Bacteroides uniformis        | 100% coverage 99% identity           | WP 005824059.1   | Multi-domain              | Metal Dependent Phosphorylase 3.26 e-6                | Metal Dependent Phosphorylase 4.1 e-53  | Metal Dependent Phosphorylase 1.9 e-6  | ppGpp Synthetase RelA/Spot 0e+00           | ppGpp Synthetase RelA/Spot 0e+00                | ppGpp Synthetase RelA/Spot 1.08 e-161 |
| 9                     | 31110a           | Library 1 | 6,063                        | Ruminococcus sp.             | 100% coverage 92% identity           | NC 021014.1      | 2817                            | Dorea longicatena            | 99% coverage 98% identity            | WP 028086444.1   | Individual Domain         | MIP-T3 Microtubule and TRAF3 binding protein 6.37 e-6 |                                         |                                        | Uncharacterized protein                    |                                                 |                                       |
|                       |                  |           |                              |                              |                                      |                  |                                 |                              |                                      |                  | Individual Domain         | MTA-like lytic transglycosylase 1.54 e-24             | Zinc metalloproteinase 2.83 e-36        |                                        | Uncharacterized protein                    | Membrane protein metalloendopeptidase 5.23 e-39 | Cell wall hydrolase 6.28 e-29         |



| Cbeq | Unique Cosmid | Library   | Metagenomic Insert Size (bp) | Closest Reference Genome | Reference genome %Coverage %Identity | Accession Number             | Effector Gene Cluster Size (bp) | Closest Reference Genome | Reference Genome %Coverage %Identity | Accession Number               | Conserved Protein Domains         | Conserved Domains                                                             | pFAM                          | SMART | COG                                                  | TIGR                                                  | PRK                                                      |                                     |
|------|---------------|-----------|------------------------------|--------------------------|--------------------------------------|------------------------------|---------------------------------|--------------------------|--------------------------------------|--------------------------------|-----------------------------------|-------------------------------------------------------------------------------|-------------------------------|-------|------------------------------------------------------|-------------------------------------------------------|----------------------------------------------------------|-------------------------------------|
|      |               |           |                              |                          |                                      |                              |                                 |                          |                                      |                                |                                   |                                                                               |                               |       |                                                      |                                                       |                                                          |                                     |
| 5    | 4f05          | Library 1 | 27,194                       | Bacteroides plebius      | 24% coverage<br>97% identity         | ABQC02000024.1               | 2874                            | Bacteroides plebius      | 100% coverage<br>99% identity        | WP 007562580.1                 | Individual Domain                 | Carbohydrate Binding Module 1.15 e-33<br>Fibronectin Type III Domain 6.19 e-8 |                               |       |                                                      | Fibronectin Type III Domain 3.4 e-5                   |                                                          |                                     |
| 14   | 3e18          | Library 1 | 31,518                       | Bacteroides plebius      | 66% coverage<br>96% identity         | ABQC02000002.1               | 2490                            | Bacteroides plebius      | 100% coverage<br>98% identity        | WP 022054304.1                 | Individual Domain                 |                                                                               | PM2 Membrane protein 1.08 e-6 |       |                                                      | Membrane protein 4.71 e-4                             |                                                          |                                     |
| 15   | 2m03          | Library 1 | 29,366                       | Bacteroides plebius      | 68% coverage<br>95% identity         | ABQC02000004.1               | 1131                            | Bacteroides plebius      | 100% coverage<br>98% identity        | WP 022054659.1                 | Multi-domain<br>Individual Domain | MurG beta-N-acetylglucosamine transferase 1.01 e-146                          |                               |       | MurG beta-N-acetylglucosamine transferase 5.85 e-106 | MurG beta-N-acetylglucosaminyl transferase 1.21 e-101 | MurG beta-N-acetylglucosaminyl transferase 4.29 e-148    |                                     |
| 1    | 25h09         | Library 1 | 30,129                       | Bacteroides dorei        | 82% coverage<br>99% identity         | CP 007619.1                  | 2358                            | Bacteroides dorei        | 100% coverage<br>99% identity        | WP 007847083.1                 | Multi-domain<br>Individual Domain | TonB Ligand gated channel 1.81 e-22                                           |                               |       | CirA Outer membrane receptor 1.38 e-27               |                                                       | TonB-hemimembrane receptor 3.15 e-9                      |                                     |
| 10   | 33g20         | Library 2 | 27,092                       | Bacteroides fragilis     | 99% coverage<br>98% identity         | NC 016776.1                  | 1065                            | Bacteroides fragilis     | 100% coverage<br>100% identity       | WP 032529456.1                 | Individual Domain                 |                                                                               |                               |       | Beta lactamase superfamily 2.83 e-21                 | Metallo-beta lactamase 2.27 e-6                       | Zn dependent hydrolase 8.4 e-41                          | metal dependent hydrolase 7.25 e-16 |
| 2    | 3             | 18b09     | Library 2                    | 38,537                   | Bacteroides fragilis                 | 99% coverage<br>99% identity | NC 003228.3                     | 3372                     | Bacteroides fragilis                 | 100% coverage<br>100% identity | WP 008770235.1                    | Multi-domain<br>Individual Domain                                             | Ligand gated channel 4.06 e-6 |       |                                                      | Cir A Outer membrane receptor 3.01 e-9                | Omp Rag Sus C Family Membrane Transporter Oe+0           |                                     |
|      |               |           |                              |                          |                                      |                              | 1620                            | Bacteroides fragilis     | 100% coverage<br>100% identity       | EXY 11524.1                    | Individual Domain                 | SuD Superfamily 2.68 e-38                                                     |                               |       | SuD Superfamily 1.23 e-67                            |                                                       |                                                          |                                     |
| 4    | 33g04         | Library 2 | 35,265                       | Bacteroides dorei        | 99% coverage<br>96% identity         | CP 008741.1                  | 2871                            | Bacteroides vulgatus     | 100% coverage<br>100% identity       | WP 032952522.1                 | Individual Domain                 | Carbohydrate Binding Module 3.73 e-36<br>Fibronectin Type III Domain 4.44 e-8 |                               |       | Fibronectin Type III Domain 2.92 e-5                 | Fibronectin Type III Domain 2.05 e-5                  |                                                          |                                     |
| 12-1 | 35i19         | Library 2 | 35,255                       | Bacteroides vulgatus     | 94% coverage<br>99% identity         | NC 009614.1                  | 981                             | Bacteroides vulgatus     | 100% coverage<br>100% identity       | WP 005845337.1                 | Individual Domain                 |                                                                               |                               |       | n-Acetyltransferase 2.11 e-15                        |                                                       | hemolysin 2.43 e-3                                       |                                     |
| 11   | 39k17         | Library 2 | 26,355                       | Bacteroides fragilis     | 99% coverage<br>99% identity         | NC 003228.3                  | 744                             | Bacteroides fragilis     | 100% coverage<br>100% identity       | WP_005797964.1                 | Multi-domain<br>Individual Domain | acyl-ACP-TE acyl acp thioesterase 1.89 e-32                                   |                               |       | FatA Thioesterase Lipid Metabolism 3.06 e-19         |                                                       | 4hbt thioesterase 4-chlorobenzoate degradation 8.37 e-14 | Thioesterase 2.48 e-3               |
|      |               |           |                              |                          |                                      |                              |                                 |                          |                                      |                                | Individual Domain                 | 4hbt thioesterase 4-chlorobenzoate degradation 1.35 e-5                       |                               |       |                                                      |                                                       | Thioesterase 6.87 e-3                                    |                                     |
| 8    | 16f15         | Library 2 | 32,631                       | Bacteroides fragilis     | 94% coverage<br>99% identity         | NC 016776.1                  | 900                             | Bacteroides fragilis     | 100% coverage<br>100% identity       | WP 005786259.1                 | Multi-domain<br>Individual Domain |                                                                               |                               |       | acetyl glucosaminidase 2.59 e-43                     |                                                       | Lysozyme 2.82 e-27                                       | Autolysin 9.67 e-24                 |
|      |               |           |                              |                          |                                      |                              |                                 |                          |                                      |                                | Individual Domain                 | LysM 1.24 e-4                                                                 |                               |       | LysM 8.74 e-5                                        |                                                       | muramidase 1.04 e-25                                     |                                     |
|      |               |           |                              |                          |                                      |                              |                                 |                          |                                      |                                | Individual Domain                 | LysM 5.33 e-6                                                                 |                               |       | LysM 3.91 e-3                                        |                                                       | LysM 9.66 e-6                                            |                                     |

1  
2  
3  
4  
5

| Cbeg                  | Unique Cosmid | Library   | Metagenomic Insert Size (bp) | Closest Reference Genome   | Reference genome %Coverage %Identity | Accession Number | Effector Gene Cluster Size (bp) | Closest Reference Genome  | Reference Genome %Coverage %Identity | Accession Number | Conserved Protein Domains | Conserved Domains                                          | pFAM                      | SMART                                  | COG                                    | TIGR                                        | PRK                                    |
|-----------------------|---------------|-----------|------------------------------|----------------------------|--------------------------------------|------------------|---------------------------------|---------------------------|--------------------------------------|------------------|---------------------------|------------------------------------------------------------|---------------------------|----------------------------------------|----------------------------------------|---------------------------------------------|----------------------------------------|
|                       |               |           |                              |                            |                                      |                  |                                 |                           |                                      |                  |                           |                                                            |                           |                                        |                                        |                                             |                                        |
| 12-3                  | 8j18          | Library 3 | 26,651                       | Bacteroides dorei          | 93% coverage<br>99% identity         | CP_007619.1      | 981                             | Bacteroides dorei         | 100% coverage<br>100% identity       | WP_007834762.1   |                           |                                                            |                           | n-acetyltransferase<br>3.52 e-15       |                                        |                                             |                                        |
| 76                    | 32o03         | Library 3 | 24,342                       | Roseburia intestinalis     | 85% coverage<br>96% identity         | NC_021012.1      | 1014                            | Roseburia intestinalis    | 100% coverage<br>96% identity        | WP_015561211.1   | Individual Domain         | lytic transglycosylase<br>1.49 e-5<br>nlp superfamily      | lysozyme like<br>2.4 e-72 |                                        | Cell wall hydrolase<br>1.44 e-28       | phage<br>peptidase/hydrolase<br>3.38 e-7    | secreted<br>endopeptidase<br>9.96 e-34 |
|                       |               |           |                              |                            |                                      |                  | 2532                            | Roseburia intestinalis    | 100% coverage<br>93% identity        | WP_015521894.1   | Individual Domain         | Multidrug and toxic component extrusion protein<br>9.6 e-4 | Unknown protein           | ABC sugar transport<br>2.09 e-3        |                                        |                                             |                                        |
| ppGpp Synthetase Gene | 22g15         | Library 3 | 35,379                       | Parabacteroides distasonis | 69% coverage<br>75% identity         | NC_009615.1      | 2106                            | Parabacteroides merdae    | 97% coverage<br>99% identity         | WP_005634199.1   | Multi-domain              |                                                            |                           | ppGpp Synthetase<br>RelA/SpoT<br>0e+00 | ppGpp Synthetase<br>RelA/SpoT<br>0e+00 | ppGpp Synthetase<br>RelA/SpoT<br>1.75 e-163 |                                        |
| ppGpp Synthetase Gene | 21f12         | Library 3 | 29,539                       | Bacteroides dorei          | 99% coverage<br>99% identity         | CP008741.1       | 2271                            | Bacteroides dorei         | 100% coverage<br>100% identity       | WP_007836277.1   | Multi-domain              |                                                            |                           | ppGpp Synthetase<br>RelA/SpoT<br>0e+00 | ppGpp Synthetase<br>RelA/SpoT<br>0e+00 | ppGpp Synthetase<br>RelA/SpoT<br>2.46 e-166 |                                        |
| ppGpp Synthetase Gene | 37b14         | Library 3 | 25,525                       | Bacteroides fragilis       | 95% coverage<br>99% identity         | NC_006347.1      | 2244                            | Bacteroides fragilis      | 100% coverage<br>100% identity       | WP_005784842.1   | Multi-domain              |                                                            |                           | ppGpp Synthetase<br>RelA/SpoT<br>0e+00 | ppGpp Synthetase<br>RelA/SpoT<br>0e+00 | ppGpp Synthetase<br>RelA/SpoT               |                                        |
| ppGpp Synthetase Gene | 40k7          | Library 3 | 31,623                       | Bacteroides xylanosolvens  | 83% coverage<br>98% identity         |                  | 2241                            | Bacteroides xylanosolvens | 100% coverage<br>99% identity        |                  | Multi-domain              |                                                            |                           | ppGpp Synthetase<br>RelA/SpoT<br>0e+00 | ppGpp Synthetase<br>RelA/SpoT<br>0e+00 | ppGpp Synthetase<br>RelA/SpoT               |                                        |

1  
2

1  
2  
3  
4  
5  
6  
7

**Table S2B. Gene tables for each unique cosmid.** Assembled full length cosmids (with the exception of a single cosmid 31i10 which is only partially assembled) underwent gene calling with Metagenemark and individual genes aligned to the NCBI nr database using ngKlast. The effector gene identified through transposon mutagenesis is identified in red.

1i11

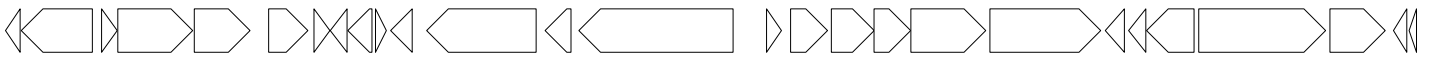

| Gene           | Length     | Accession Number    | Hit Definition                                                      | E Value   | Identity      |
|----------------|------------|---------------------|---------------------------------------------------------------------|-----------|---------------|
| gene 1         | 101        | WP_005634251        | MULTISPECIES: glycosyl hydrolase [Parabacteroides].                 | 1.00E-38  | 100%          |
| gene 2         | 490        | WP_005634249        | MULTISPECIES: oxidoreductase [Parabacteroides].                     | 5.00E-297 | 100%          |
| gene 3         | 107        | WP_005634247        | MULTISPECIES: membrane protein [Parabacteroides].                   | 1.00E-41  | 100%          |
| gene 4         | 516        | WP_005634245        | cytochrome C oxidase subunit II [Parabacteroides merdae].           | 1.00E-289 | 99.80%        |
| gene 5         | 384        | WP_005634243        | cytochrome D ubiquinol oxidase, subunit II [Parabacteroidesmerdae]. | 4.00E-166 | 99.70%        |
| gene 6         | 270        | WP_022322920        | ribonuclease Z [Parabacteroides merdae CAG:48].                     | 3.00E-155 | 100%          |
| gene 7         | 109        | WP_005634237        | hypothetical protein [Parabacteroides merdae].                      | 2.00E-53  | 100%          |
| gene 8         | 115        | WP_005634235        | hypothetical protein [Parabacteroides merdae].                      | 3.00E-29  | 100%          |
| gene 9         | 166        | WP_005634233        | MULTISPECIES: glucosaminidase [Parabacteroides].                    | 9.00E-94  | 100%          |
| gene 10        | 74         | WP_005634231        | MULTISPECIES: hypothetical protein [Parabacteroides].               | 2.00E-37  | 100%          |
| gene 11        | 148        | WP_022322918        | putative DNA-binding protein [Parabacteroides merdae CAG:48].       | 4.00E-68  | 100%          |
| gene 12        | 755        | WP_005644530        | hypothetical protein [Parabacteroides merdae].                      | 0         | 99.60%        |
| gene 13        | 178        | WP_005644526        | hypothetical protein [Parabacteroides merdae].                      | 8.00E-55  | 97.40%        |
| gene 14        | 1064       | WP_005634215        | hypothetical protein [Parabacteroides merdae].                      | 0         | 98%           |
| gene 15        | 102        | WP_005634211        | MULTISPECIES: hypothetical protein [Parabacteroides].               | 5.00E-51  | 100%          |
| gene 16        | 254        | WP_005634208        | chromosome partitioning protein ParA [Parabacteroides merdae].      | 1.00E-135 | 100%          |
| gene 17        | 295        | WP_005634207        | chromosome partitioning protein ParB [Parabacteroides merdae].      | 2.00E-151 | 100%          |
| gene 18        | 252        | WP_005634205        | MULTISPECIES: hypothetical protein [Parabacteroides].               | 4.00E-135 | 100%          |
| gene 19        | 516        | WP_022321377        | lysM domain protein [Parabacteroides merdae CAG:48].                | 9.00E-301 | 99.80%        |
| <b>gene 20</b> | <b>701</b> | <b>WP_005634199</b> | <b>GTP pyrophosphokinase [Parabacteroides merdae].</b>              | <b>0</b>  | <b>99.90%</b> |
| gene 21        | 64         | WP_005649494        | GTP pyrophosphokinase [Parabacteroides merdae].                     | 9.00E-27  | 100%          |
| gene 22        | 87         | WP_005634197        | MULTISPECIES: hypothetical protein [Parabacteroides].               | 2.00E-35  | 100%          |
| gene 23        | 327        | WP_005634192        | MULTISPECIES: peptidase M23 [Parabacteroides].                      | 2.00E-178 | 100%          |
| gene 24        | 875        | WP_005634190        | alanyl-tRNA synthetase [Parabacteroides merdae].                    | 0         | 99.90%        |
| gene 25        | 381        | WP_022321829        | 3-dehydroquinase synthase [Parabacteroides merdae CAG:48].          | 9.00E-201 | 100%          |
| gene 26        | 91         | WP_005649490        | MULTISPECIES: integration host factor [Parabacteroides].            | 7.00E-45  | 100%          |
| gene 27        | 24         | WP_008146034        | hypothetical protein [Parabacteroides johnsonii].                   | 5.00E-05  | 100%          |

8  
9

2m03

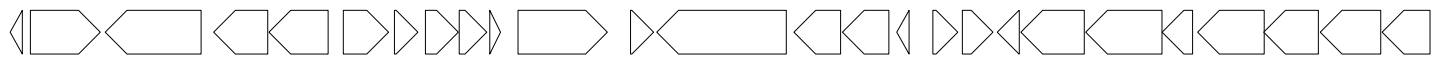

| Gene           | Length     | Accession Number    | Hit Definition                                                                                         | E Value          | Identity      |
|----------------|------------|---------------------|--------------------------------------------------------------------------------------------------------|------------------|---------------|
| gene 1         | 84         | WP_016660809        | hypothetical protein [Bacteroides stercoris].                                                          | 2.00E-28         | 100%          |
| gene 2         | 481        | WP_005642186        | MULTISPECIES: transposase [Bacteroidales].                                                             | 6.00E-276        | 100%          |
| gene 3         | 660        | WP_009123684        | energy transducer TonB [Bacteroides fluxus].                                                           | 0                | 99.80%        |
| gene 4         | 372        | WP_009123685        | MULTISPECIES: hypothetical protein [Bacteroides].                                                      | 7.00E-198        | 100%          |
| gene 5         | 407        | WP_009123686        | MULTISPECIES: integrase [Bacteroides].                                                                 | 8.00E-236        | 100%          |
| gene 6         | 311        | WP_022054647        | putative uncharacterized protein [Bacteroides plebeius CAG:211].                                       | 2.00E-151        | 96.80%        |
| gene 7         | 161        | WP_007559889        | MULTISPECIES: ferritin [Bacteroides].                                                                  | 8.00E-87         | 99.40%        |
| gene 8         | 226        | WP_022054648        | putative uncharacterized protein [Bacteroides plebeius CAG:211].                                       | 1.00E-130        | 98.70%        |
| gene 9         | 189        | WP_007559893        | cobalamin adenosyltransferase [Bacteroides plebeius].                                                  | 4.00E-94         | 99.50%        |
| gene 10        | 73         | WP_002558131        | MULTISPECIES: hypothetical protein [Bacteroidales].                                                    | 2.00E-36         | 100%          |
| gene 11        | 615        | WP_022307353        | putative uncharacterized protein [Alistipes sp. CAG:268].                                              | 0                | 90.90%        |
| gene 12        | 158        | WP_022054650        | putative uncharacterized protein [Bacteroides plebeius CAG:211].                                       | 1.00E-77         | 100%          |
| gene 13        | 892        | WP_022054651        | putative uncharacterized protein [Bacteroides plebeius CAG:211].                                       | 0                | 99%           |
| gene 14        | 321        | WP_007559905        | MULTISPECIES: DNA-cytosine methyltransferase [Bacteroides].                                            | 2.00E-172        | 100%          |
| gene 15        | 319        | WP_007559905        | MULTISPECIES: DNA-cytosine methyltransferase [Bacteroides].                                            | 4.00E-181        | 99.70%        |
| gene 16        | 84         | WP_007559907        | MULTISPECIES: 30S ribosomal protein S20 [Bacteroides].                                                 | 5.00E-30         | 100%          |
| gene 17        | 171        | WP_022054652        | putative uncharacterized protein [Bacteroides plebeius CAG:211].                                       | 6.00E-79         | 96.50%        |
| gene 18        | 210        | WP_007559912        | DNA repair protein RecO [Bacteroides plebeius].                                                        | 2.00E-117        | 100%          |
| gene 19        | 151        | WP_007559914        | aspartyl-tRNA amidotransferase subunit B [Bacteroides plebeius].                                       | 1.00E-75         | 100%          |
| gene 20        | 436        | WP_022354669        | cell division protein FtsZ [Bacteroides sp. CAG:875].                                                  | 6.00E-189        | 99.10%        |
| gene 21        | 525        | WP_022054656        | putative uncharacterized protein [Bacteroides plebeius CAG:211].                                       | 2.00E-231        | 100%          |
| gene 22        | 209        | WP_022054657        | putative uncharacterized protein [Bacteroides plebeius CAG:211].                                       | 3.00E-106        | 99%           |
| gene 23        | 458        | WP_022054658        | uDP-N-acetylmuramate--L-alanine ligase [Bacteroides plebeiusCAG:211].                                  | 2.00E-264        | 99.60%        |
| <b>gene 24</b> | <b>376</b> | <b>WP_007559923</b> | <b>UDP-diphospho-muramoylpentapeptide beta-N-acetylglucosaminyltransferase [Bacteroides plebeius].</b> | <b>2.00E-197</b> | <b>98.10%</b> |
| gene 25        | 416        | WP_022054660        | putative uncharacterized protein [Bacteroides plebeius CAG:211].                                       | 5.00E-219        | 97.60%        |
| gene 26        | 329        | WP_022054661        | uDP-N-acetylmuramoylalanine--D-glutamate ligase [Bacteroidesplebeius CAG:211].                         | 2.00E-191        | 100%          |

1  
2  
3

3b03

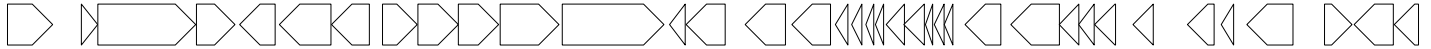

| Gene           | Length     | Accession Number    | Hit Definition                                                    | E Value   | Identity    |
|----------------|------------|---------------------|-------------------------------------------------------------------|-----------|-------------|
| gene 1         | 331        | WP_015532350        | Domain of Unknown Function (DUF349) [Bacteroides xylanisolvens].  | 1.00E-159 | 100%        |
| gene 2         | 119        | WP_004301405        | MULTISPECIES: hypothetical protein [Bacteroides].                 | 1.00E-50  | 100%        |
| gene 3         | 718        | WP_004301403        | cell division protein FtsH [Bacteroides ovatus].                  | 0         | 100%        |
| gene 4         | 282        | WP_004301401        | phosphatidate cytidyltransferase [Bacteroides ovatus].            | 3.00E-149 | 99.60%      |
| gene 5         | 260        | WP_032845960        | hypothetical protein [Bacteroides ovatus].                        | 2.00E-140 | 100%        |
| gene 6         | 378        | WP_004301397        | lipid-A-disaccharide synthase [Bacteroides ovatus].               | 9.00E-217 | 100%        |
| gene 7         | 277        | WP_004301396        | stationary phase survival protein SurE [Bacteroides ovatus].      | 4.00E-164 | 99.60%      |
| gene 8         | 254        | WP_004301394        | MULTISPECIES: chromosome partitioning protein ParA [Bacteroides]. | 3.00E-135 | 100%        |
| gene 9         | 296        | WP_004320990        | chromosome partitioning protein ParB [Bacteroides ovatus].        | 4.00E-160 | 100%        |
| gene 10        | 295        | WP_004301390        | MULTISPECIES: hypothetical protein [Bacteroides].                 | 1.00E-165 | 100%        |
| gene 11        | 431        | WP_004301388        | MULTISPECIES: lytic transglycosylase [Bacteroides].               | 7.00E-251 | 100%        |
| <b>gene 12</b> | <b>746</b> | <b>WP_004301386</b> | <b>GTP pyrophosphokinase [Bacteroides ovatus].</b>                | <b>0</b>  | <b>100%</b> |
| gene 13        | 114        | WP_004301384        | MULTISPECIES: transcriptional regulator [Bacteroides].            | 6.00E-58  | 100%        |
| gene 14        | 286        | WP_004301381        | peptidase M23 [Bacteroides ovatus].                               | 2.00E-163 | 100%        |
| gene 15        | 295        | WP_004320991        | hypothetical protein [Bacteroides ovatus].                        | 4.00E-160 | 100%        |
| gene 16        | 283        | WP_004320992        | hypothetical protein [Bacteroides ovatus].                        | 2.00E-160 | 100%        |
| gene 17        | 91         | WP_004320993        | hypothetical protein [Bacteroides ovatus].                        | 5.00E-37  | 100%        |
| gene 18        | 74         | WP_004320994        | hypothetical protein [Bacteroides ovatus].                        | 4.00E-38  | 100%        |
| gene 19        | 57         | WP_015531800        | hypothetical protein [Bacteroides xylanisolvens].                 | 5.00E-24  | 96.50%      |
| gene 20        | 59         | WP_004323037        | hypothetical protein [Bacteroides ovatus].                        | 3.00E-25  | 94.90%      |
| gene 21        | 133        | WP_015531798        | hypothetical protein [Bacteroides xylanisolvens].                 | 2.00E-73  | 100%        |
| gene 22        | 150        | WP_004296549        | MULTISPECIES: hypothetical protein [Bacteroides].                 | 4.00E-78  | 96%         |
| gene 23        | 52         | WP_004320996        | hypothetical protein [Bacteroides ovatus].                        | 2.00E-21  | 100%        |
| gene 24        | 71         | WP_004320997        | hypothetical protein [Bacteroides ovatus].                        | 5.00E-32  | 100%        |
| gene 25        | 62         | WP_004320998        | hypothetical protein [Bacteroides ovatus].                        | 2.00E-29  | 100%        |
| gene 26        | 262        | WP_004321000        | hypothetical protein [Bacteroides ovatus].                        | 6.00E-141 | 100%        |
| gene 27        | 356        | WP_004321002        | penicillin-binding protein 2B [Bacteroides ovatus].               | 8.00E-202 | 100%        |
| gene 28        | 143        | WP_004321003        | hypothetical protein [Bacteroides ovatus].                        | 6.00E-10  | 100%        |
| gene 29        | 113        | WP_004321004        | hypothetical protein [Bacteroides ovatus].                        | 4.00E-45  | 100%        |
| gene 30        | 153        | WP_004321005        | hypothetical protein [Bacteroides ovatus].                        | 6.00E-64  | 100%        |
| gene 31        | 148        | WP_022021199        | uncharacterized protein [Bacteroides sp. CAG:661].                | 2.00E-53  | 64.20%      |
| gene 32        | 195        | WP_004324654        | tyrosine recombinase [Bacteroides ovatus].                        | 1.00E-105 | 99%         |
| gene 33        | 90         | WP_004321010        | hypothetical protein [Bacteroides ovatus].                        | 1.00E-44  | 100%        |
| gene 34        | 338        | WP_005681910        | hypothetical protein [Bacteroides caccae].                        | 5.00E-184 | 99.40%      |
| gene 35        | 201        | WP_004323732        | hypothetical protein [Bacteroides ovatus].                        | 3.00E-116 | 100%        |
| gene 36        | 287        | WP_004323733        | hypothetical protein [Bacteroides ovatus].                        | 6.00E-169 | 100%        |
| gene 37        | 177        | WP_004323734        | hypothetical protein [Bacteroides ovatus].                        | 8.00E-103 | 99.40%      |

1  
2  
3

3e18

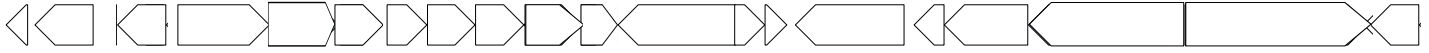

| Gene           | Length     | Accession Number    | Hit Definition                                                   | E Value   | Identity   |
|----------------|------------|---------------------|------------------------------------------------------------------|-----------|------------|
| gene 1         | 159        | WP_003228230        | levansucrase [Bacillus subtilis].                                | 2.00E-85  | 100%       |
| gene 2         | 432        | WP_007900085        | MULTISPECIES: hypothetical protein [Bacteroidales].              | 2.00E-236 | 98.10%     |
| gene 3         | 274        | WP_022054294        | tonB-dependent receptor plug [Bacteroides plebeius CAG:211].     | 8.00E-133 | 97%        |
| gene 4         | 680        | WP_022054295        | methionine--tRNA ligase [Bacteroides plebeius CAG:211].          | 0         | 99.70%     |
| gene 5         | 481        | WP_007559421        | lipopolysaccharide biosynthesis protein [Bacteroides plebeius].  | 4.00E-272 | 99.20%     |
| gene 6         | 312        | WP_007559422        | glycosyltransferase family 2 [Bacteroides plebeius].             | 3.00E-180 | 98.40%     |
| gene 7         | 295        | WP_007559424        | LICD [Bacteroides plebeius].                                     | 1.00E-170 | 96.90%     |
| gene 8         | 353        | WP_007559425        | hemolysin activation protein [Bacteroides plebeius].             | 1.00E-213 | 99.20%     |
| gene 9         | 358        | WP_007559426        | glycosyl transferase [Bacteroides plebeius].                     | 5.00E-196 | 97.20%     |
| gene 10        | 420        | WP_007559427        | glycosyl transferase [Bacteroides plebeius].                     | 3.00E-235 | 98.10%     |
| gene 11        | 254        | WP_007559428        | glycosyl transferase family 2 [Bacteroides plebeius].            | 2.00E-146 | 99.20%     |
| <b>gene 12</b> | <b>874</b> | <b>WP_007559429</b> | <b>membrane protein [Bacteroides plebeius].</b>                  | <b>0</b>  | <b>99%</b> |
| gene 13        | 223        | WP_022054305        | putative uncharacterized protein [Bacteroides plebeius CAG:211]. | 1.00E-126 | 100%       |
| gene 14        | 161        | WP_007559432        | MULTISPECIES: S-ribosylhomocysteinase [Bacteroides].             | 2.00E-89  | 100%       |
| gene 15        | 808        | WP_022054306        | putative uncharacterized protein [Bacteroides plebeius CAG:211]. | 0         | 98.90%     |
| gene 16        | 222        | WP_022054307        | uncharacterized protein [Bacteroides plebeius CAG:211].          | 5.00E-122 | 98.60%     |
| gene 17        | 620        | WP_022054308        | uncharacterized protein [Bacteroides plebeius CAG:211].          | 0         | 99.80%     |
| gene 18        | 1030       | WP_022054309        | putative uncharacterized protein [Bacteroides plebeius CAG:211]. | 0         | 99.80%     |
| gene 19        | 1361       | WP_022054310        | putative uncharacterized protein [Bacteroides plebeius CAG:211]. | 0         | 96.60%     |
| gene 20        | 261        | WP_032726907        | levansucrase [Bacillus subtilis].                                | 1.00E-132 | 99.20%     |

1

2

4h09

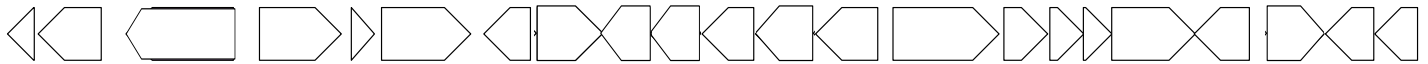

| Gene           | Length     | Accession Number    | Hit Definition                                                             | E Value   | Identity    |
|----------------|------------|---------------------|----------------------------------------------------------------------------|-----------|-------------|
| gene 1         | 153        | WP_022401844        | uncharacterized protein [Bacteroides uniformis CAG:3].                     | 7.00E-65  | 98.70%      |
| gene 2         | 359        | WP_009037388        | oxidoreductase [Bacteroides sp. D20].                                      | 4.00E-212 | 98.90%      |
| gene 3         | 612        | WP_005833760        | MULTISPECIES: antibiotic ABC transporter ATP-binding protein[Bacteroides]. | 0         | 99.70%      |
| gene 4         | 466        | WP_005833763        | hypothetical protein [Bacteroides uniformis].                              | 5.00E-226 | 100%        |
| gene 5         | 131        | WP_005833765        | hypothetical protein [Bacteroides uniformis].                              | 1.00E-66  | 100%        |
| gene 6         | 508        | WP_005833767        | hypothetical protein [Bacteroides uniformis].                              | 1.00E-294 | 100%        |
| gene 7         | 265        | WP_005833769        | hypothetical protein [Bacteroides uniformis].                              | 2.00E-158 | 100%        |
| gene 8         | 367        | WP_005833771        | glycosyltransferase family 1 [Bacteroides uniformis].                      | 1.00E-204 | 100%        |
| gene 9         | 272        | WP_005833773        | glycosyl transferase [Bacteroides uniformis].                              | 2.00E-152 | 99.60%      |
| gene 10        | 278        | WP_005833775        | glycosyl transferase [Bacteroides uniformis].                              | 2.00E-161 | 100%        |
| gene 11        | 294        | WP_005833777        | hypothetical protein [Bacteroides uniformis].                              | 1.00E-174 | 100%        |
| gene 12        | 321        | WP_005833780        | hypothetical protein [Bacteroides uniformis].                              | 4.00E-187 | 100%        |
| gene 13        | 354        | WP_005833782        | CDP-glycerol glycerophosphotransferase [Bacteroides uniformis].            | 5.00E-211 | 100%        |
| <b>gene 14</b> | <b>604</b> | <b>WP_005833784</b> | <b>hypothetical protein [Bacteroides uniformis].</b>                       | <b>0</b>  | <b>100%</b> |
| gene 15        | 249        | WP_005825949        | MULTISPECIES: hypothetical protein [Bacteroides].                          | 5.00E-144 | 100%        |
| gene 16        | 193        | WP_005833786        | phosphoheptose isomerase [Bacteroides uniformis].                          | 1.00E-103 | 100%        |
| gene 17        | 162        | WP_005833788        | D,D-heptose 1,7-bisphosphate phosphatase [Bacteroides uniformis].          | 9.00E-91  | 100%        |
| gene 18        | 476        | WP_005833790        | RfaE, domain I [Bacteroides uniformis].                                    | 2.00E-244 | 100%        |
| gene 19        | 314        | WP_005833792        | hypothetical protein [Bacteroides uniformis].                              | 5.00E-183 | 100%        |
| gene 20        | 305        | WP_005825959        | MULTISPECIES: hypothetical protein [Bacteroides].                          | 2.00E-179 | 100%        |
| gene 21        | 275        | WP_005833794        | MULTISPECIES: LicD [Bacteroides].                                          | 1.00E-162 | 100%        |
| gene 22        | 243        | WP_005825963        | MULTISPECIES: hypothetical protein [Bacteroides].                          | 8.00E-125 | 100%        |

1  
2  
3

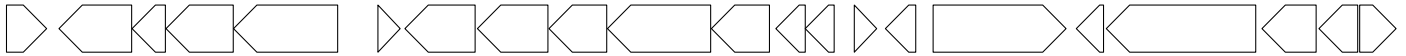

| Gene           | Length     | Accession Number    | Hit Definition                                                   | E Value   | Identity      |
|----------------|------------|---------------------|------------------------------------------------------------------|-----------|---------------|
| gene 1         | 257        | WP_032726907        | levansucrase [Bacillus subtilis].                                | 9.00E-133 | 99.20%        |
| gene 2         | 466        | WP_022052955        | putative uncharacterized protein [Bacteroides plebeius CAG:211]. | 1.00E-262 | 99.60%        |
| gene 3         | 213        | WP_007563484        | ATP-dependent DNA helicase [Bacteroides plebeius].               | 9.00E-115 | 98.10%        |
| gene 4         | 431        | WP_022052957        | uPF0597 protein BACPLE_03244 [Bacteroides plebeius CAG:211].     | 4.00E-239 | 99.30%        |
| gene 5         | 668        | WP_022052958        | putative uncharacterized protein [Bacteroides plebeius CAG:211]. | 0         | 99.90%        |
| gene 6         | 142        | WP_007758564        | mobilization protein [Bacteroides finegoldii].                   | 2.00E-52  | 96.30%        |
| gene 7         | 450        | WP_005832685        | multidrug transporter MatE [Bacteroides uniformis].              | 4.00E-87  | 50%           |
| gene 8         | 452        | WP_026983296        | RND transporter [Flavobacterium sp. URHB0058].                   | 1.00E-63  | 31.60%        |
| gene 9         | 370        | WP_012505954        | multidrug transporter AcrB [Prosthecochloris aestuarii].         | 4.00E-90  | 53.10%        |
| gene 10        | 662        | WP_012466369        | multidrug transporter AcrB [Chlorobium limicola].                | 8.00E-152 | 56%           |
| gene 11        | 372        | WP_026812990        | secretion protein HlyD [Arenibacter certesii].                   | 6.00E-51  | 32%           |
| gene 12        | 188        | WP_008999156        | DNA-binding protein [Bacteroides sp. D2].                        | 3.00E-24  | 37.50%        |
| gene 13        | 185        | WP_008147829        | hypothetical protein [Parabacteroides johnsonii].                | 3.00E-74  | 75%           |
| gene 14        | 143        | WP_008147828        | MULTISPECIES: nitroreductase [Bacteroidales].                    | 1.00E-71  | 94.40%        |
| gene 15        | 194        | WP_022054717        | putative uncharacterized protein [Bacteroides plebeius CAG:211]. | 9.00E-84  | 98%           |
| gene 16        | 853        | WP_007562587        | beta-N-acetylglucosaminidase [Bacteroides plebeius].             | 0         | 98.70%        |
| gene 17        | 174        | WP_007562582        | diguanylate cyclase [Bacteroides plebeius].                      | 5.00E-95  | 99.40%        |
| <b>gene 18</b> | <b>959</b> | <b>WP_007562580</b> | <b>xanthan lyase [Bacteroides plebeius].</b>                     | <b>0</b>  | <b>98.70%</b> |
| gene 19        | 347        | WP_007562578        | ketol-acid reductoisomerase [Bacteroides plebeius].              | 3.00E-198 | 100%          |
| gene 20        | 248        | WP_007562576        | acyl-ACP thioesterase [Bacteroides plebeius].                    | 3.00E-139 | 98.40%        |
| gene 21        | 233        | WP_003228230        | levansucrase [Bacillus subtilis].                                | 5.00E-118 | 100%          |

1  
2  
3



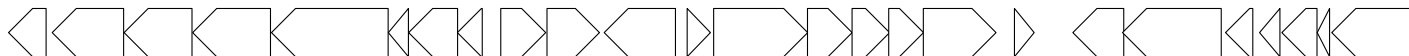

| Gene           | Length     | Accession Number    | Hit Definition                                                                         | E Value          | Identity    |
|----------------|------------|---------------------|----------------------------------------------------------------------------------------|------------------|-------------|
| gene 1         | 233        | WP_003228230        | levansucrase [Bacillus subtilis].                                                      | 1.00E-118        | 98.60%      |
| gene 2         | 444        | WP_007834746        | UDP-N-acetylmuramoylalanine--D-glutamate ligase [Bacteroidesdorei].                    | 1.00E-259        | 100%        |
| gene 3         | 422        | WP_007834748        | MULTISPECIES: phospho-N-acetylmuramoyl-pentapeptide-transferase[Bacteroides].          | 5.00E-187        | 100%        |
| gene 4         | 484        | WP_007834750        | UDP-N-acetylmuramoylalanyl-D-glutamate--2,6-diaminopimelate ligase[Bacteroides dorei]. | 4.00E-267        | 100%        |
| gene 5         | 726        | WP_007834752        | MULTISPECIES: penicillin-binding protein [Bacteroides].                                | 0                | 100%        |
| gene 6         | 124        | WP_007847173        | MULTISPECIES: hypothetical protein [Bacteroides].                                      | 1.00E-48         | 100%        |
| gene 7         | 304        | WP_008674321        | 16S rRNA methyltransferase [Bacteroides sp. 9_1_42FAA].                                | 3.00E-168        | 100%        |
| gene 8         | 154        | WP_007834758        | MULTISPECIES: cell division protein MraZ [Bacteroides].                                | 6.00E-84         | 100%        |
| gene 9         | 279        | WP_007834760        | glycerol acyltransferase [Bacteroides dorei CAG:222].                                  | 1.00E-161        | 100%        |
| <b>gene 10</b> | <b>326</b> | <b>WP_007834762</b> | <b>MULTISPECIES: hemolysin [Bacteroides].</b>                                          | <b>2.00E-187</b> | <b>100%</b> |
| gene 11        | 443        | WP_007834767        | MULTISPECIES: dehydrogenase [Bacteroides].                                             | 7.00E-254        | 100%        |
| gene 12        | 144        | WP_005845350        | MULTISPECIES: deoxyuridine 5'-triphosphate nucleotidohydrolase[Bacteroides].           | 2.00E-76         | 100%        |
| gene 13        | 585        | WP_007842003        | hypothetical protein [Bacteroides dorei].                                              | 0                | 100%        |
| gene 14        | 277        | WP_007842008        | MULTISPECIES: hypothetical protein [Bacteroides].                                      | 1.00E-153        | 100%        |
| gene 15        | 233        | WP_008655581        | peptidase M23 [Bacteroides sp. 3_1_33FAA].                                             | 4.00E-104        | 100%        |
| gene 16        | 216        | WP_007834770        | MULTISPECIES: peptidase M23 [Bacteroides].                                             | 3.00E-90         | 100%        |
| gene 17        | 452        | WP_007834771        | hypothetical protein [Bacteroides dorei].                                              | 1.00E-247        | 100%        |
| gene 18        | 122        | WP_007834772        | MULTISPECIES: RNA-binding protein [Bacteroides].                                       | 3.00E-39         | 100%        |
| gene 19        | 316        | WP_007842013        | MULTISPECIES: glutaminase [Bacteroides].                                               | 3.00E-164        | 100%        |
| gene 20        | 614        | WP_007842021        | MULTISPECIES: 4-hydroxy-3-methylbut-2-en-1-yl diphosphate synthase[Bacteroides].       | 0                | 99.80%      |
| gene 21        | 169        | WP_007834776        | MULTISPECIES: phosphoribosylaminoimidazole carboxylase[Bacteroides].                   | 1.00E-72         | 100%        |
| gene 22        | 126        | WP_007834777        | MULTISPECIES: glycine cleavage system protein H [Bacteroides].                         | 2.00E-66         | 100%        |
| gene 23        | 218        | WP_007855043        | membrane protein [Bacteroides dorei].                                                  | 4.00E-116        | 100%        |
| gene 24        | 76         | WP_007847161        | RNA polymerase sigma54 factor [Bacteroides dorei].                                     | 1.00E-35         | 100%        |
| gene 25        | 524        | WP_007834779        | MULTISPECIES: RNA polymerase sigma54 factor [Bacteroides].                             | 1.00E-142        | 99.20%      |

1

2

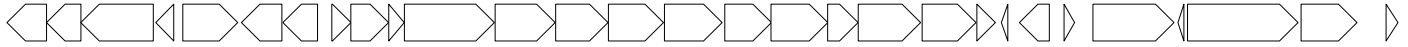

| Gene          | Length     | Accession Number    | Hit Definition                                                                                       | E Value          | Identity    |
|---------------|------------|---------------------|------------------------------------------------------------------------------------------------------|------------------|-------------|
| gene 1        | 320        | WP_008655581        | peptidase M23 [Bacteroides sp. 3_1_33FAA].                                                           | 8.00E-139        | 100%        |
| gene 2        | 277        | WP_007847169        | hypothetical protein [Bacteroides dorei].                                                            | 5.00E-154        | 100%        |
| gene 3        | 585        | WP_007847170        | MULTISPECIES: hypothetical protein [Bacteroides].                                                    | 0                | 100%        |
| gene 4        | 144        | WP_005845350        | MULTISPECIES: deoxyuridine 5'-triphosphate nucleotidohydrolase[Bacteroides].                         | 2.00E-76         | 100%        |
| gene 5        | 443        | WP_007834767        | MULTISPECIES: dehydrogenase [Bacteroides].                                                           | 7.00E-254        | 100%        |
| <b>gene 6</b> | <b>326</b> | <b>WP_007834762</b> | <b>MULTISPECIES: hemolysin [Bacteroides].</b>                                                        | <b>2.00E-187</b> | <b>100%</b> |
| gene 7        | 279        | WP_007834760        | glycerol acyltransferase [Bacteroides dorei CAG:222].                                                | 1.00E-161        | 100%        |
| gene 8        | 154        | WP_007834758        | MULTISPECIES: cell division protein MraZ [Bacteroides].                                              | 6.00E-84         | 100%        |
| gene 9        | 304        | WP_008674321        | 16S rRNA methyltransferase [Bacteroides sp. 9_1_42FAA].                                              | 3.00E-168        | 100%        |
| gene 10       | 124        | WP_007847173        | MULTISPECIES: hypothetical protein [Bacteroides].                                                    | 1.00E-48         | 100%        |
| gene 11       | 726        | WP_007834752        | MULTISPECIES: penicillin-binding protein [Bacteroides].                                              | 0                | 100%        |
| gene 12       | 484        | WP_007834750        | UDP-N-acetylmuramoylalanyl-D-glutamate--2,6-diaminopimelate ligase[Bacteroides dorei].               | 4.00E-267        | 100%        |
| gene 13       | 422        | WP_007834748        | MULTISPECIES: phospho-N-acetylmuramoyl-pentapeptide-transferase[Bacteroides].                        | 5.00E-187        | 100%        |
| gene 14       | 444        | WP_007847176        | MULTISPECIES: UDP-N-acetylmuramoylalanine--D-glutamate ligase[Bacteroides].                          | 1.00E-259        | 100%        |
| gene 15       | 465        | WP_007834744        | MULTISPECIES: rod shape-determining protein RodA [Bacteroides].                                      | 6.00E-222        | 100%        |
| gene 16       | 376        | WP_007834743        | MULTISPECIES: UDP-diphospho-muramoylpentapeptide beta-N-acetylglucosaminyltransferase [Bacteroides]. | 1.00E-182        | 100%        |
| gene 17       | 458        | WP_007841992        | MULTISPECIES: UDP-N-acetylmuramate--alanine ligase [Bacteroides].                                    | 9.00E-257        | 100%        |
| gene 18       | 245        | WP_007834741        | MULTISPECIES: cell division protein FtsQ [Bacteroides].                                              | 1.00E-129        | 100%        |
| gene 19       | 503        | WP_008674315        | cell division protein FtsA [Bacteroides sp. 9_1_42FAA].                                              | 8.00E-255        | 100%        |
| gene 20       | 434        | WP_016275184        | MULTISPECIES: cell division protein FtsZ [Bacteroidales].                                            | 2.00E-193        | 100%        |
| gene 21       | 149        | WP_007847182        | aspartyl-tRNA amidotransferase subunit B [Bacteroides dorei].                                        | 7.00E-56         | 99.30%      |
| gene 22       | 51         | n/a                 | n/a                                                                                                  | n/a              | n/a         |
| gene 23       | 241        | WP_007834736        | MULTISPECIES: DNA repair protein RecO [Bacteroides].                                                 | 7.00E-137        | 100%        |
| gene 24       | 84         | WP_005838940        | MULTISPECIES: 30S ribosomal protein S20 [Bacteroides].                                               | 2.00E-30         | 100%        |
| gene 25       | 654        | WP_007834731        | MULTISPECIES: DNA-cytosine methyltransferase [Bacteroides].                                          | 0                | 99.80%      |
| gene 26       | 47         | WP_007855026        | hypothetical protein [Bacteroides dorei CAG:222].                                                    | 2.00E-19         | 97.90%      |
| gene 27       | 892        | WP_007834727        | 4-alpha-glucanotransferase [Bacteroides dorei].                                                      | 0                | 100%        |
| gene 28       | 451        | WP_007847194        | major facilitator transporter [Bacteroides dorei].                                                   | 3.00E-248        | 99.80%      |
| gene 29       | 96         | WP_008655562        | transcriptional regulator [Bacteroides sp. 3_1_33FAA].                                               | 3.00E-46         | 100%        |

1

2

15d03

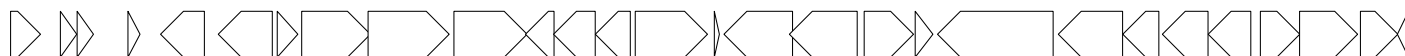

| Gene           | Length     | Accession Number    | Hit Definition                                                      | E Value   | Identity    |
|----------------|------------|---------------------|---------------------------------------------------------------------|-----------|-------------|
| gene 1         | 195        | WP_007836312        | MULTISPECIES: hypothetical protein [Bacteroides].                   | 1.00E-110 | 98%         |
| gene 2         | 106        | WP_008674893        | MULTISPECIES: hypothetical protein [Bacteroides].                   | 2.00E-46  | 100%        |
| gene 3         | 106        | WP_007836307        | MULTISPECIES: XRE family transcriptional regulator [Bacteroides].   | 2.00E-52  | 100%        |
| gene 4         | 78         | WP_007836305        | MULTISPECIES: hypothetical protein [Bacteroides].                   | 6.00E-38  | 98.70%      |
| gene 5         | 286        | WP_007836303        | MULTISPECIES: transcriptional regulator [Bacteroides].              | 2.00E-163 | 100%        |
| gene 6         | 353        | WP_007836297        | MULTISPECIES: 3-dehydroquinase synthase [Bacteroides].              | 7.00E-205 | 100%        |
| gene 7         | 134        | WP_008656260        | hypothetical protein [Bacteroides sp. 3_1_33FAA].                   | 3.00E-61  | 100%        |
| gene 8         | 449        | WP_007836292        | MULTISPECIES: hypothetical protein [Bacteroides].                   | 2.00E-238 | 100%        |
| gene 9         | 530        | WP_007836292        | MULTISPECIES: hypothetical protein [Bacteroides].                   | 6.00E-300 | 100%        |
| gene 10        | 478        | WP_007836290        | MULTISPECIES: cardiolipin synthetase [Bacteroides].                 | 3.00E-270 | 100%        |
| gene 11        | 186        | WP_007836288        | methyltransferase [Bacteroides dorei].                              | 4.00E-103 | 100%        |
| gene 12        | 272        | WP_007836286        | MULTISPECIES: hypothetical protein [Bacteroides].                   | 2.00E-148 | 100%        |
| gene 13        | 228        | WP_007836284        | MULTISPECIES: hypothetical protein [Bacteroides].                   | 9.00E-120 | 100%        |
| gene 14        | 472        | WP_007836283        | ATP-dependent endonuclease [Bacteroides dorei].                     | 1.00E-263 | 99.80%      |
| gene 15        | 32         | n/a                 | n/a                                                                 | n/a       | n/a         |
| gene 16        | 448        | WP_007836280        | MULTISPECIES: alanyl-tRNA synthetase [Bacteroides].                 | 5.00E-252 | 100%        |
| gene 17        | 443        | WP_007836280        | MULTISPECIES: alanyl-tRNA synthetase [Bacteroides].                 | 1.00E-237 | 99.50%      |
| gene 18        | 322        | WP_007840678        | MULTISPECIES: peptidase M23 [Bacteroides].                          | 4.00E-184 | 100%        |
| gene 19        | 115        | WP_007836278        | MULTISPECIES: transcriptional regulator [Bacteroides].              | 3.00E-58  | 100%        |
| <b>gene 20</b> | <b>756</b> | <b>WP_007836277</b> | <b>MULTISPECIES: GTP pyrophosphokinase [Bacteroides].</b>           | <b>0</b>  | <b>100%</b> |
| gene 21        | 420        | WP_007836276        | MULTISPECIES: lytic transglycosylase [Bacteroides].                 | 5.00E-245 | 100%        |
| gene 22        | 235        | WP_032934275        | MULTISPECIES: hypothetical protein [Bacteroides].                   | 5.00E-122 | 100%        |
| gene 23        | 298        | WP_005845804        | MULTISPECIES: chromosome partitioning protein ParB [Bacteroides].   | 8.00E-150 | 100%        |
| gene 24        | 278        | WP_032936379        | chromosome partitioning protein ParA [Bacteroides dorei].           | 2.00E-136 | 100%        |
| gene 25        | 257        | WP_007836273        | MULTISPECIES: stationary phase survival protein SurE [Bacteroides]. | 3.00E-150 | 100%        |
| gene 26        | 379        | WP_007836272        | MULTISPECIES: lipid-A-disaccharide synthase [Bacteroides].          | 3.00E-218 | 100%        |
| gene 27        | 244        | WP_007845865        | MULTISPECIES: hypothetical protein [Bacteroides].                   | 7.00E-138 | 100%        |
| gene 28        | 72         | WP_007836270        | phosphatidate cytidyltransferase [Bacteroides dorei].               | 2.00E-32  | 98.60%      |

1  
2  
3

15m04

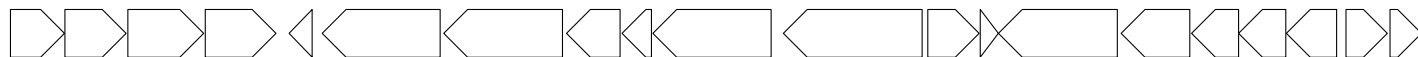

| Gene           | Length     | Accession Number    | Hit Definition                                                       | E Value   | Identity    |
|----------------|------------|---------------------|----------------------------------------------------------------------|-----------|-------------|
| gene 1         | 339        | WP_008764224        | MULTISPECIES: hypothetical protein [Bacteroides].                    | 3.00E-197 | 100%        |
| gene 2         | 384        | WP_008764225        | MULTISPECIES: phospholipase [Bacteroides].                           | 3.00E-207 | 100%        |
| gene 3         | 476        | WP_008760902        | MULTISPECIES: endo-beta-N-acetylglucosaminidase [Bacteroides].       | 6.00E-262 | 100%        |
| gene 4         | 444        | WP_008764227        | peptidoglycan-binding protein [Bacteroides sp. 1_1_6].               | 3.00E-253 | 100%        |
| gene 5         | 144        | WP_008760904        | MULTISPECIES: hypothetical protein [Bacteroides].                    | 4.00E-80  | 100%        |
| gene 6         | 741        | WP_008760905        | alpha-1 2-mannosidase [Bacteroides sp. 1_1_14].                      | 0         | 99.90%      |
| gene 7         | 746        | WP_016269483        | hypothetical protein [Bacteroides thetaiotaomicron].                 | 0         | 100%        |
| gene 8         | 336        | WP_032814424        | anti-sigma factor [Bacteroides thetaiotaomicron].                    | 4.00E-176 | 99.70%      |
| gene 9         | 184        | WP_008760908        | MULTISPECIES: RNA polymerase sigma70 factor [Bacteroides].           | 3.00E-92  | 100%        |
| gene 10        | 743        | WP_008764233        | alpha-1 2-mannosidase [Bacteroides sp. 1_1_6].                       | 0         | 99.90%      |
| gene 11        | 872        | WP_011109057        | alanyl-tRNA synthetase [Bacteroides thetaiotaomicron].               | 0         | 99.90%      |
| gene 12        | 322        | WP_008760911        | MULTISPECIES: peptidase M23 [Bacteroides].                           | 7.00E-185 | 100%        |
| gene 13        | 113        | WP_008760912        | MULTISPECIES: transcriptional regulator [Bacteroides].               | 5.00E-57  | 100%        |
| <b>gene 14</b> | <b>747</b> | <b>WP_008760913</b> | <b>MULTISPECIES: GTP pyrophosphokinase [Bacteroides].</b>            | <b>0</b>  | <b>100%</b> |
| gene 15        | 431        | WP_008764235        | MULTISPECIES: lytic transglycosylase [Bacteroides].                  | 2.00E-250 | 100%        |
| gene 16        | 295        | WP_008760915        | MULTISPECIES: hypothetical protein [Bacteroides].                    | 3.00E-148 | 100%        |
| gene 17        | 296        | WP_008760916        | MULTISPECIES: chromosome partitioning protein ParB [Bacteroides].    | 1.00E-159 | 100%        |
| gene 18        | 315        | WP_008760917        | chromosome partitioning protein ParA [Bacteroides thetaiotaomicron]. | 7.00E-171 | 100%        |
| gene 19        | 259        | WP_008760918        | MULTISPECIES: stationary phase survival protein SurE [Bacteroides].  | 1.00E-152 | 100%        |
| gene 20        | 198        | WP_008760919        | lipid-A-disaccharide synthase [Bacteroides sp. 1_1_14].              | 3.00E-112 | 100%        |

1  
2  
3

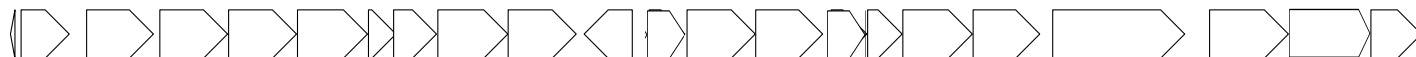

| Gene          | Length     | Accession           | Hit Definition                                                             | E Value          | Identity    |
|---------------|------------|---------------------|----------------------------------------------------------------------------|------------------|-------------|
| gene 1        | 28         | WP_005800760        | cytidine deaminase [Bacteroides fragilis].                                 | 8.00E-07         | 100%        |
| <b>gene 2</b> | <b>299</b> | <b>WP_005786259</b> | <b>MULTISPECIES: N-acetylmuramoyl-L-alanine amidase [Bacteroides].</b>     | <b>7.00E-171</b> | <b>100%</b> |
| gene 3        | 415        | WP_032528499        | ABC transporter permease [Bacteroides fragilis].                           | 2.00E-216        | 100%        |
| gene 4        | 421        | WP_005786264        | MULTISPECIES: ABC transporter permease [Bacteroides].                      | 5.00E-215        | 100%        |
| gene 5        | 422        | WP_005800756        | ABC transporter permease [Bacteroides fragilis].                           | 4.00E-228        | 99.80%      |
| gene 6        | 435        | WP_005816631        | MULTISPECIES: ABC transporter permease [Bacteroides].                      | 2.00E-238        | 100%        |
| gene 7        | 170        | WP_032567596        | ABC transporter permease [Bacteroides fragilis].                           | 3.00E-93         | 100%        |
| gene 8        | 266        | WP_005800752        | ABC transporter permease [Bacteroides fragilis].                           | 2.00E-125        | 100%        |
| gene 9        | 435        | WP_005816632        | MULTISPECIES: ABC transporter permease [Bacteroides].                      | 1.00E-230        | 100%        |
| gene 10       | 423        | WP_032528500        | ABC transporter permease [Bacteroides fragilis].                           | 2.00E-247        | 100%        |
| gene 11       | 299        | WP_005786279        | MULTISPECIES: transcriptional regulator [Bacteroides].                     | 1.00E-169        | 100%        |
| gene 12       | 221        | WP_032528501        | macrolide ABC transporter ATP-binding protein [Bacteroides fragilis].      | 6.00E-120        | 100%        |
| gene 13       | 424        | WP_005816636        | MULTISPECIES: ABC transporter permease [Bacteroides].                      | 9.00E-198        | 100%        |
| gene 14       | 416        | WP_032528502        | ABC transporter permease [Bacteroides fragilis].                           | 6.00E-231        | 100%        |
| gene 15       | 221        | WP_005795276        | MULTISPECIES: macrolide ABC transporter ATP-binding protein [Bacteroides]. | 4.00E-119        | 100%        |
| gene 16       | 214        | WP_005795275        | MULTISPECIES: hypothetical protein [Bacteroides].                          | 3.00E-117        | 100%        |
| gene 17       | 432        | WP_014298553        | ABC transporter permease [Bacteroides fragilis].                           | 1.00E-226        | 100%        |
| gene 18       | 414        | WP_005816642        | MULTISPECIES: ABC transporter permease [Bacteroides].                      | 7.00E-211        | 100%        |
| gene 19       | 821        | WP_005795272        | MULTISPECIES: sensor histidine kinase [Bacteroides].                       | 0                | 100%        |
| gene 20       | 490        | WP_005795271        | MULTISPECIES: membrane protein [Bacteroides].                              | 1.00E-251        | 100%        |
| gene 21       | 449        | WP_032529652        | chemotaxis protein CheY [Bacteroides fragilis].                            | 7.00E-249        | 100%        |
| gene 22       | 315        | WP_005786305        | MULTISPECIES: sensor histidine kinase [Bacteroides].                       | 2.00E-156        | 100%        |

1  
2  
3

18b09

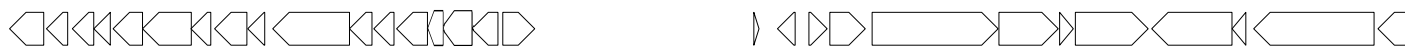

| Gene           | Length      | Accession Number    | Hit Definition                                                                     | E Value          | Identity    |
|----------------|-------------|---------------------|------------------------------------------------------------------------------------|------------------|-------------|
| gene 1         | 310         | WP_005798453        | MULTISPECIES: anti-sigma factor [Bacteroides].                                     | 4.00E-175        | 100%        |
| gene 2         | 192         | WP_005791112        | MULTISPECIES: RNA polymerase sigma70 factor [Bacteroides].                         | 9.00E-105        | 100%        |
| gene 3         | 194         | WP_005791113        | MULTISPECIES: GTP cyclohydrolase [Bacteroides].                                    | 1.00E-105        | 100%        |
| gene 4         | 149         | WP_032580447        | cell division protein [Bacteroides fragilis].                                      | 9.00E-72         | 100%        |
| gene 5         | 267         | WP_005791115        | MULTISPECIES: triosephosphate isomerase [Bacteroides].                             | 3.00E-128        | 100%        |
| gene 6         | 443         | WP_032529314        | DoxX family protein [Bacteroides fragilis].                                        | 1.00E-246        | 99.80%      |
| gene 7         | 180         | WP_005791117        | MULTISPECIES: hypothetical protein [Bacteroides].                                  | 1.00E-95         | 100%        |
| gene 8         | 293         | WP_008770039        | MULTISPECIES: peptidase M23 [Bacteroides].                                         | 3.00E-166        | 100%        |
| gene 9         | 154         | WP_008770040        | MULTISPECIES: nucleoside diphosphate kinase [Bacteroides].                         | 2.00E-82         | 100%        |
| gene 10        | 698         | WP_005817637        | MULTISPECIES: ATP-dependent DNA helicase RecG [Bacteroides].                       | 0                | 100%        |
| gene 11        | 204         | WP_005802112        | MULTISPECIES: 2-C-methyl-D-erythritol 4-phosphatecytidyltransferase [Bacteroides]. | 1.00E-111        | 100%        |
| gene 12        | 183         | WP_005791124        | MULTISPECIES: thiazole biosynthesis protein Thij [Bacteroides].                    | 1.00E-93         | 100%        |
| gene 13        | 280         | WP_008657688        | MULTISPECIES: cell envelope biogenesis protein TonB [Bacteroides].                 | 2.00E-60         | 100%        |
| gene 14        | 140         | WP_010993550        | biopolymer transporter ExbD [Bacteroides fragilis].                                | 3.00E-72         | 100%        |
| gene 15        | 240         | WP_005791129        | MULTISPECIES: biopolymer transporter ExbB [Bacteroides].                           | 5.00E-121        | 100%        |
| gene 16        | 237         | WP_005791132        | MULTISPECIES: pyridoxamine 5'-phosphate oxidase [Bacteroides].                     | 6.00E-123        | 100%        |
| gene 17        | 290         | WP_005791134        | MULTISPECIES: inorganic polyphosphate/ATP-NAD kinase [Bacteroides].                | 6.00E-163        | 100%        |
| gene 18        | 46          | WP_005799295        | hypothetical protein [Bacteroides fragilis].                                       | 2.00E-09         | 94.10%      |
| gene 19        | 160         | WP_032497521        | MULTISPECIES: hypothetical protein [Bacteroides].                                  | 1.00E-68         | 100%        |
| gene 20        | 165         | WP_032599763        | RNA polymerase sigma70 factor [Bacteroides fragilis].                              | 4.00E-74         | 100%        |
| gene 21        | 322         | WP_005791673        | MULTISPECIES: anti-sigma factor [Bacteroides].                                     | 6.00E-173        | 100%        |
| <b>gene 22</b> | <b>1146</b> | <b>WP_008770235</b> | <b>MULTISPECIES: TonB-linked outer membrane protein [Bacteroides].</b>             | <b>0</b>         | <b>100%</b> |
| <b>gene 23</b> | <b>539</b>  | <b>WP_005791678</b> | <b>MULTISPECIES: membrane protein [Bacteroides].</b>                               | <b>2.00E-303</b> | <b>100%</b> |
| gene 24        | 124         | WP_032529351        | hypothetical protein [Bacteroides fragilis].                                       | 4.00E-66         | 100%        |
| gene 25        | 662         | WP_032529350        | endonuclease [Bacteroides fragilis].                                               | 0                | 100%        |
| gene 26        | 730         | WP_022348127        | MULTISPECIES: uncharacterized protein [Bacteroides].                               | 0                | 100%        |
| gene 27        | 124         | WP_005791690        | MULTISPECIES: transcriptional regulator [Bacteroides].                             | 3.00E-63         | 100%        |
| gene 28        | 1095        | WP_005821947        | peptidase S41 [Bacteroides fragilis].                                              | 0                | 100%        |
| gene 29        | 277         | WP_005791692        | MULTISPECIES: malate dehydrogenase [Bacteroides].                                  | 3.00E-139        | 100%        |

1  
2  
3

21f12

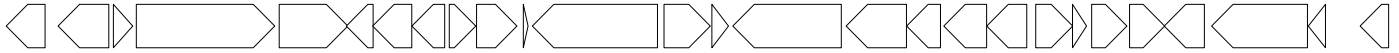

| Gene           | Length     | Accession Number    | Hit Definition                                                      | E Value   | Identity    |
|----------------|------------|---------------------|---------------------------------------------------------------------|-----------|-------------|
| gene 1         | 270        | WP_007836303        | MULTISPECIES: transcriptional regulator [Bacteroides].              | 2.00E-152 | 99.60%      |
| gene 2         | 353        | WP_007836297        | MULTISPECIES: 3-dehydroquinase synthase [Bacteroides].              | 7.00E-205 | 100%        |
| gene 3         | 134        | WP_008656260        | hypothetical protein [Bacteroides sp. 3_1_33FAA].                   | 3.00E-61  | 100%        |
| gene 4         | 965        | WP_007836292        | MULTISPECIES: hypothetical protein [Bacteroides].                   | 0         | 100%        |
| gene 5         | 478        | WP_007836290        | MULTISPECIES: cardiolipin synthetase [Bacteroides].                 | 3.00E-270 | 100%        |
| gene 6         | 186        | WP_007836288        | methyltransferase [Bacteroides dorei].                              | 4.00E-103 | 100%        |
| gene 7         | 272        | WP_007836286        | MULTISPECIES: hypothetical protein [Bacteroides].                   | 2.00E-148 | 100%        |
| gene 8         | 228        | WP_007836284        | MULTISPECIES: hypothetical protein [Bacteroides].                   | 9.00E-120 | 100%        |
| gene 9         | 184        | WP_007840675        | ATP-dependent endonuclease [Bacteroides dorei].                     | 4.00E-74  | 100%        |
| gene 10        | 281        | WP_008674890        | ATP-dependent endonuclease [Bacteroides sp. 9_1_42FAA].             | 1.00E-156 | 100%        |
| gene 11        | 32         | n/a                 | n/a                                                                 | n/a       | n/a         |
| gene 12        | 872        | WP_007836280        | MULTISPECIES: alanyl-tRNA synthetase [Bacteroides].                 | 0         | 99.90%      |
| gene 13        | 322        | WP_007840678        | MULTISPECIES: peptidase M23 [Bacteroides].                          | 4.00E-184 | 100%        |
| gene 14        | 115        | WP_007836278        | MULTISPECIES: transcriptional regulator [Bacteroides].              | 3.00E-58  | 100%        |
| <b>gene 15</b> | <b>756</b> | <b>WP_007836277</b> | <b>MULTISPECIES: GTP pyrophosphokinase [Bacteroides].</b>           | <b>0</b>  | <b>100%</b> |
| gene 16        | 420        | WP_022185205        | uncharacterized protein [Bacteroides dorei CAG:222].                | 9.00E-245 | 100%        |
| gene 17        | 235        | WP_032936421        | hypothetical protein [Bacteroides dorei].                           | 5.00E-122 | 100%        |
| gene 18        | 298        | WP_005845804        | MULTISPECIES: chromosome partitioning protein ParB [Bacteroides].   | 8.00E-150 | 100%        |
| gene 19        | 278        | WP_007840682        | MULTISPECIES: chromosome partitioning protein ParA [Bacteroides].   | 3.00E-136 | 100%        |
| gene 20        | 257        | WP_007836273        | MULTISPECIES: stationary phase survival protein SurE [Bacteroides]. | 3.00E-150 | 100%        |
| gene 21        | 97         | WP_007836272        | MULTISPECIES: lipid-A-disaccharide synthase [Bacteroides].          | 3.00E-48  | 100%        |
| gene 22        | 245        | WP_007836272        | MULTISPECIES: lipid-A-disaccharide synthase [Bacteroides].          | 1.00E-135 | 100%        |
| gene 23        | 244        | WP_007845865        | MULTISPECIES: hypothetical protein [Bacteroides].                   | 7.00E-138 | 100%        |
| gene 24        | 279        | WP_007836270        | phosphatidate cytidylyltransferase [Bacteroides dorei].             | 4.00E-143 | 99.60%      |
| gene 25        | 668        | WP_007836269        | MULTISPECIES: cell division protein FtsH [Bacteroides].             | 0         | 100%        |
| gene 26        | 119        | WP_007836264        | MULTISPECIES: hypothetical protein [Bacteroides].                   | 2.00E-62  | 100%        |
| gene 27        | 198        | WP_007836261        | MULTISPECIES: hypothetical protein [Bacteroides].                   | 1.00E-106 | 100%        |

1  
2  
3

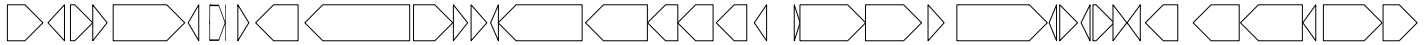

| Gene           | Length     | Accession Number    | Hit Definition                                                                          | E Value   | Identity      |
|----------------|------------|---------------------|-----------------------------------------------------------------------------------------|-----------|---------------|
| gene 1         | 296        | WP_022322466        | oxidoreductase 2-nitropropane dioxygenase family protein[Parabacteroides merdae CAG:48] | 3.00E-152 | 100%          |
| gene 2         | 137        | WP_005634170        | MULTISPECIES: membrane protein [Parabacteroides].                                       | 5.00E-57  | 100%          |
| gene 3         | 185        | WP_005634172        | MULTISPECIES: RNA polymerase sigma70 factor [Parabacteroides].                          | 1.00E-97  | 99.50%        |
| gene 4         | 119        | WP_005634173        | MULTISPECIES: hypothetical protein [Parabacteroides].                                   | 1.00E-49  | 99.20%        |
| gene 5         | 597        | WP_005649481        | 30S ribosomal protein S1 [Parabacteroides merdae].                                      | 0         | 100%          |
| gene 6         | 87         | WP_005634177        | MULTISPECIES: hypothetical protein [Parabacteroides].                                   | 1.00E-36  | 100%          |
| gene 7         | 129        | WP_005634180        | chemotaxis protein CheY [Parabacteroides merdae].                                       | 2.00E-65  | 100%          |
| gene 8         | 91         | WP_005649490        | MULTISPECIES: integration host factor [Parabacteroides].                                | 2.00E-44  | 98.90%        |
| gene 9         | 354        | WP_022321829        | 3-dehydroquinase synthase [Parabacteroides merdae CAG:48].                              | 8.00E-201 | 100%          |
| gene 10        | 875        | WP_005634190        | alanyl-tRNA synthetase [Parabacteroides merdae].                                        | 0         | 99.90%        |
| gene 11        | 327        | WP_005644517        | peptidase M23 [Parabacteroides merdae].                                                 | 1.00E-178 | 100%          |
| gene 12        | 118        | WP_005634196        | MULTISPECIES: transcriptional regulator [Parabacteroides].                              | 3.00E-59  | 100%          |
| gene 13        | 131        | WP_005634197        | MULTISPECIES: hypothetical protein [Parabacteroides].                                   | 1.00E-62  | 100%          |
| gene 14        | 64         | WP_005649494        | GTP pyrophosphokinase [Parabacteroides merdae].                                         | 9.00E-27  | 100%          |
| <b>gene 15</b> | <b>701</b> | <b>WP_005634199</b> | <b>GTP pyrophosphokinase [Parabacteroides merdae].</b>                                  | <b>0</b>  | <b>99.70%</b> |
| gene 16        | 516        | WP_022321377        | lysM domain protein [Parabacteroides merdae CAG:48].                                    | 3.00E-301 | 100%          |
| gene 17        | 252        | WP_005634205        | MULTISPECIES: hypothetical protein [Parabacteroides].                                   | 4.00E-135 | 100%          |
| gene 18        | 295        | WP_005634207        | chromosome partitioning protein ParB [Parabacteroides merdae].                          | 2.00E-151 | 100%          |
| gene 19        | 254        | WP_005634208        | chromosome partitioning protein ParA [Parabacteroides merdae].                          | 1.00E-135 | 100%          |
| gene 20        | 102        | WP_005634211        | MULTISPECIES: hypothetical protein [Parabacteroides].                                   | 5.00E-51  | 100%          |
| gene 21        | 48         | WP_005634215        | hypothetical protein [Parabacteroides merdae].                                          | 3.00E-14  | 100%          |
| gene 22        | 548        | WP_005634215        | hypothetical protein [Parabacteroides merdae].                                          | 6.00E-285 | 94.20%        |
| gene 23        | 468        | WP_005634215        | hypothetical protein [Parabacteroides merdae].                                          | 9.00E-247 | 96.90%        |
| gene 24        | 134        | WP_005644526        | hypothetical protein [Parabacteroides merdae].                                          | 5.00E-25  | 95.20%        |
| gene 25        | 755        | WP_005634221        | hypothetical protein [Parabacteroides merdae].                                          | 0         | 99.50%        |
| gene 26        | 61         | WP_005634223        | hypothetical protein [Parabacteroides merdae].                                          | 5.00E-03  | 100%          |
| gene 27        | 148        | WP_022322918        | putative DNA-binding protein [Parabacteroides merdae CAG:48].                           | 8.00E-68  | 99.30%        |
| gene 28        | 74         | WP_005634231        | MULTISPECIES: hypothetical protein [Parabacteroides].                                   | 2.00E-37  | 100%          |
| gene 29        | 175        | WP_005634233        | MULTISPECIES: glucosaminidase [Parabacteroides].                                        | 9.00E-94  | 100%          |
| gene 30        | 115        | WP_005634235        | hypothetical protein [Parabacteroides merdae].                                          | 3.00E-29  | 100%          |
| gene 31        | 109        | WP_005634237        | hypothetical protein [Parabacteroides merdae].                                          | 2.00E-53  | 100%          |
| gene 32        | 270        | WP_022322920        | ribonuclease Z [Parabacteroides merdae CAG:48].                                         | 3.00E-155 | 100%          |
| gene 33        | 384        | WP_005644540        | cytochrome D ubiquinol oxidase, subunit II [Parabacteroidesmerdae].                     | 2.00E-168 | 99.70%        |
| gene 34        | 516        | WP_005634245        | cytochrome C oxidase subunit II [Parabacteroides merdae].                               | 2.00E-290 | 100%          |
| gene 35        | 107        | WP_005634247        | MULTISPECIES: membrane protein [Parabacteroides].                                       | 1.00E-41  | 100%          |
| gene 36        | 490        | WP_005634249        | MULTISPECIES: oxidoreductase [Parabacteroides].                                         | 5.00E-297 | 100%          |
| gene 37        | 284        | WP_005634251        | MULTISPECIES: glycosyl hydrolase [Parabacteroides].                                     | 2.00E-144 | 100%          |

1  
2  
3



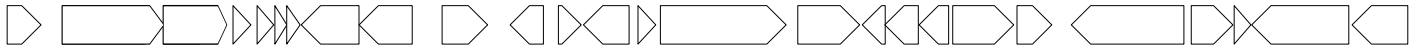

| Gene           | Length     | Accession Number    | Hit Definition                                                     | E Value   | Identity      |
|----------------|------------|---------------------|--------------------------------------------------------------------|-----------|---------------|
| gene 1         | 262        | WP_032944525        | thiamine biosynthesis protein ThiF [Bacteroides vulgatus].         | 1.00E-149 | 100%          |
| gene 2         | 790        | WP_032944607        | histidine kinase [Bacteroides vulgatus].                           | 0         | 99.90%        |
| gene 3         | 435        | WP_032944527        | chemotaxis protein CheY [Bacteroides vulgatus].                    | 2.00E-247 | 100%          |
| gene 4         | 138        | WP_032949291        | hypothetical protein [Bacteroides vulgatus].                       | 1.00E-73  | 100%          |
| gene 5         | 128        | WP_032944609        | transcriptional regulator [Bacteroides vulgatus].                  | 7.00E-54  | 100%          |
| gene 6         | 92         | WP_032944529        | excisionase [Bacteroides vulgatus].                                | 4.00E-44  | 96.70%        |
| gene 7         | 103        | WP_022161963        | MULTISPECIES: uncharacterized protein [Bacteroides].               | 2.00E-51  | 98.10%        |
| gene 8         | 447        | WP_022161962        | uncharacterized protein [Bacteroides sp. CAG:633].                 | 2.00E-240 | 97.10%        |
| gene 9         | 411        | WP_022161961        | tyrosine type site-specific recombinase [Bacteroides sp. CAG:633]. | 8.00E-235 | 99.80%        |
| gene 10        | 352        | WP_005810485        | hypothetical protein [Bacteroides fragilis].                       | 2.00E-201 | 100%          |
| gene 11        | 257        | WP_005824094        | hypothetical protein [Bacteroides uniformis].                      | 3.00E-130 | 100%          |
| gene 12        | 176        | WP_009037187        | DNA-binding protein [Bacteroides sp. D20].                         | 1.00E-94  | 100%          |
| gene 13        | 353        | WP_005835147        | MULTISPECIES: 3-dehydroquinase synthase [Bacteroides].             | 2.00E-194 | 100%          |
| gene 14        | 137        | WP_009037184        | membrane protein [Bacteroides sp. D20].                            | 2.00E-60  | 100%          |
| gene 15        | 974        | WP_009037183        | hypothetical protein [Bacteroides sp. D20].                        | 0         | 99.70%        |
| gene 16        | 479        | WP_005824073        | MULTISPECIES: cardiolipin synthetase [Bacteroides].                | 1.00E-277 | 100%          |
| gene 17        | 177        | WP_005824070        | MULTISPECIES: methyltransferase [Bacteroides].                     | 3.00E-98  | 100%          |
| gene 18        | 259        | WP_005835157        | hypothetical protein [Bacteroides uniformis].                      | 2.00E-147 | 100%          |
| gene 19        | 228        | WP_005824067        | MULTISPECIES: hypothetical protein [Bacteroides].                  | 4.00E-120 | 99.60%        |
| gene 20        | 472        | WP_005824065        | MULTISPECIES: ATP-dependent endonuclease [Bacteroides].            | 7.00E-268 | 100%          |
| gene 21        | 269        | WP_005835166        | MULTISPECIES: hypothetical protein [Bacteroides].                  | 2.00E-153 | 100%          |
| gene 22        | 872        | WP_005824062        | MULTISPECIES: alanyl-tRNA synthetase [Bacteroides].                | 0         | 100%          |
| gene 23        | 322        | WP_005824061        | MULTISPECIES: peptidase M23 [Bacteroides].                         | 5.00E-185 | 100%          |
| gene 24        | 129        | WP_005824060        | MULTISPECIES: transcriptional regulator [Bacteroides].             | 2.00E-66  | 100%          |
| <b>gene 25</b> | <b>752</b> | <b>WP_005824059</b> | <b>MULTISPECIES: GTP pyrophosphokinase [Bacteroides].</b>          | <b>0</b>  | <b>99.90%</b> |
| gene 26        | 431        | WP_005824058        | MULTISPECIES: lytic transglycosylase [Bacteroides].                | 1.00E-249 | 99.80%        |

1  
2  
3

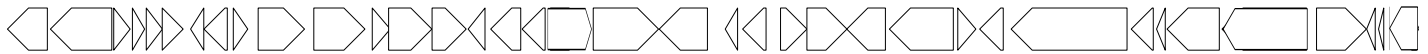

| Gene           | Length     | Accession Number    | Hit Definition                                                                | E Value   | Identity      |
|----------------|------------|---------------------|-------------------------------------------------------------------------------|-----------|---------------|
| gene 1         | 284        | WP_007846654        | integrase [Bacteroides dorei].                                                | 2.00E-148 | 98.60%        |
| gene 2         | 436        | WP_007846652        | integrase [Bacteroides dorei].                                                | 3.00E-232 | 99.30%        |
| gene 3         | 116        | WP_005649903        | tyrosine recombinase [Parabacteroides merdae].                                | 2.00E-30  | 72.40%        |
| gene 4         | 86         | WP_032543834        | hypothetical protein [Bacteroides fragilis].                                  | 2.00E-38  | 98.80%        |
| gene 5         | 114        | WP_032543834        | hypothetical protein [Bacteroides fragilis].                                  | 6.00E-57  | 98.20%        |
| gene 6         | 148        | WP_032543835        | hypothetical protein [Bacteroides fragilis].                                  | 5.00E-71  | 98.60%        |
| gene 7         | 93         | WP_013612210        | MULTISPECIES: DNA-binding protein [Bacteroidales].                            | 1.00E-45  | 98.90%        |
| gene 8         | 165        | WP_021645363        | hypothetical protein [Bacteroides pyogenes].                                  | 9.00E-70  | 95.40%        |
| gene 9         | 102        | WP_021645362        | hypothetical protein [Bacteroides pyogenes].                                  | 3.00E-51  | 99%           |
| gene 10        | 329        | WP_013612208        | virulence-associated E family protein [Odoribacter splanchnicus].             | 6.00E-192 | 99.10%        |
| gene 11        | 363        | WP_008157037        | mobilization protein [Parabacteroides johnsonii].                             | 6.00E-199 | 97.20%        |
| gene 12        | 127        | WP_016661720        | hypothetical protein [Bacteroides stercoris].                                 | 1.00E-62  | 99.20%        |
| gene 13        | 307        | WP_005645891        | mobilization protein [Parabacteroides merdae].                                | 2.00E-144 | 95.60%        |
| gene 14        | 242        | WP_032594609        | hypothetical protein [Bacteroides fragilis].                                  | 2.00E-119 | 92.10%        |
| gene 15        | 119        | WP_009126239        | hypothetical protein [Bacteroides fluxus].                                    | 4.00E-51  | 98.30%        |
| gene 16        | 213        | WP_005790176        | hypothetical protein [Bacteroides fragilis].                                  | 6.00E-112 | 96.70%        |
| gene 17        | 163        | WP_022217865        | uncharacterized protein [Bacteroides clarus CAG:160].                         | 2.00E-77  | 97.10%        |
| gene 18        | 281        | WP_005790180        | LuxR family transcriptional regulator [Bacteroides fragilis].                 | 1.00E-133 | 95.30%        |
| gene 19        | 464        | WP_032496997        | MULTISPECIES: ArsR family transcriptional regulator [Bacteroides].            | 2.00E-258 | 95.60%        |
| gene 20        | 342        | WP_009229000        | hypothetical protein [Prevotella sp. oral taxon 299].                         | 8.00E-111 | 58.40%        |
| gene 21        | 87         | WP_007834964        | MULTISPECIES: hypothetical protein [Bacteroides].                             | 2.00E-43  | 98.90%        |
| gene 22        | 166        | WP_007834963        | MULTISPECIES: hypothetical protein [Bacteroides].                             | 1.00E-94  | 100%          |
| gene 23        | 187        | WP_008656811        | alkaline phosphatase [Bacteroides sp. 3_1_33FAA].                             | 5.00E-99  | 100%          |
| gene 24        | 284        | WP_007851359        | alkaline phosphatase [Bacteroides dorei].                                     | 4.00E-151 | 100%          |
| gene 25        | 274        | WP_007851360        | competence protein ComEA [Bacteroides dorei].                                 | 5.00E-146 | 100%          |
| gene 26        | 454        | WP_007834957        | MULTISPECIES: hypothetical protein [Bacteroides].                             | 2.00E-226 | 100%          |
| gene 27        | 128        | WP_007834955        | MULTISPECIES: hypothetical protein [Bacteroides].                             | 3.00E-71  | 100%          |
| gene 28        | 167        | WP_007834952        | MULTISPECIES: RNA polymerase sigma factor [Bacteroides].                      | 4.00E-91  | 100%          |
| <b>gene 29</b> | <b>824</b> | <b>WP_007847083</b> | <b>MULTISPECIES: TonB-dependent receptor [Bacteroides].</b>                   | <b>0</b>  | <b>99.80%</b> |
| gene 30        | 156        | WP_005845492        | MULTISPECIES: adenylate cyclase [Bacteroides].                                | 1.00E-85  | 100%          |
| gene 31        | 61         | WP_008781241        | MULTISPECIES: hypothetical protein [Bacteroides].                             | 9.00E-27  | 98.40%        |
| gene 32        | 371        | WP_007834946        | MULTISPECIES: peptide chain release factor 2 [Bacteroides].                   | 5.00E-204 | 100%          |
| gene 33        | 601        | WP_007842133        | long-chain fatty acid-CoA ligase [Bacteroides dorei].                         | 0         | 100%          |
| gene 34        | 354        | WP_007834942        | MULTISPECIES: acetylornithine deacetylase [Bacteroides].                      | 2.00E-200 | 99.70%        |
| gene 35        | 60         | WP_005849515        | hypothetical protein [Bacteroides vulgatus].                                  | 1.00E-08  | 100%          |
| gene 36        | 36         | WP_007842131        | hypothetical protein [Bacteroides dorei].                                     | 6.00E-12  | 100%          |
| gene 37        | 182        | WP_007842122        | MULTISPECIES: capsular polysaccharide biosynthesis protein CapD[Bacteroides]. | 2.00E-98  | 100%          |

1  
2  
3

31i10

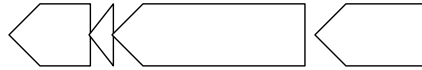

| Gene          | Length     | Accession Number    | Hit Definition                                                                            | E Value   | Identity      |
|---------------|------------|---------------------|-------------------------------------------------------------------------------------------|-----------|---------------|
| gene 1        | 394        | WP_028086446        | hypothetical protein [Dorea longicatena].                                                 | 7.00E-196 | 100%          |
| gene 2        | 117        | WP_012744294        | hypothetical protein [Eubacterium rectale].                                               | 3.00E-42  | 88.80%        |
| <b>gene 3</b> | <b>933</b> | <b>WP_028086444</b> | <b>peptidase M23 [Dorea longicatena].</b>                                                 | <b>0</b>  | <b>98.60%</b> |
| gene 4        | 534        | WP_024720789        | MULTISPECIES: conjugal transfer protein TraE [unclassifiedClostridiales (miscellaneous)]. | 4.00E-297 | 99.60%        |

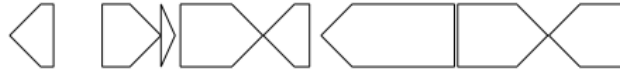

| Gene   | Length | Accession Number | Hit Definition                                                               | E Value   | Identity |
|--------|--------|------------------|------------------------------------------------------------------------------|-----------|----------|
| gene 1 | 211    | WP_003127055.1   | MULTISPECIES: transcriptional regulator (Firmicutes)                         | 5.00E-152 | 100%     |
| gene 2 | 283    | WP_015542745.1   | Putative phage replication protein RstA (Ruminococcus obeum)                 | 0         | 100%     |
| gene 3 | 67     | WP_002610247.1   | MULTISPECIES: excisionase (Bacteria)                                         | 9.00E-40  | 100%     |
| gene 4 | 397    | WP_003436632.1   | integrase (Clostridium difficile)                                            | 0.00E+00  | 100%     |
| gene 5 | 222    | WP_015529634.1   | propionate CoA-transferase (Ruminococcus torques)                            | 4.00E-117 | 99%      |
| gene 6 | 643    | WP_015529633.1   | NADH:flavin oxidoreductases, Old Yellow Enzyme family (ruminococcus torques) | 0         | 100%     |
| gene 7 | 434    | WP_015529632.1   | hypothetical protein (ruminococcus torques)                                  | 0.00E+00  | 100%     |
| gene 8 | 359    | WP_015529631.1   | hypothetical protein (ruminococcus torques)                                  | 0.00E+00  | 100%     |

1  
2  
3

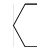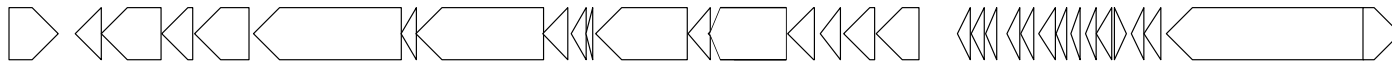

| Gene          | Length     | Accession Number    | Hit Definition                                                                                 | E Value          | Identity      |
|---------------|------------|---------------------|------------------------------------------------------------------------------------------------|------------------|---------------|
| gene 1        | 282        | WP_032726907        | levansucrase [Bacillus subtilis].                                                              | 6.00E-134        | 99.20%        |
| gene 2        | 149        | WP_022111720        | putative uncharacterized protein [Roseburia intestinalis CAG:13].                              | 1.00E-51         | 100%          |
| gene 3        | 343        | WP_015521896        | hypothetical protein [Roseburia intestinalis].                                                 | 1.00E-169        | 93%           |
| gene 4        | 177        | WP_005348419        | MULTISPECIES: quinolinate synthetase [Eubacterium].                                            | 0.88             | 16.80%        |
| <b>gene 5</b> | <b>312</b> | <b>WP_015561211</b> | <b>Cell wall-associated hydrolases (invasion-associated proteins)[Roseburia intestinalis].</b> | <b>7.00E-180</b> | <b>97.40%</b> |
| <b>gene 6</b> | <b>849</b> | <b>WP_015521894</b> | <b>hypothetical protein [Roseburia intestinalis].</b>                                          | <b>0</b>         | <b>92.50%</b> |
| gene 7        | 87         | WP_015521893        | hypothetical protein [Roseburia intestinalis].                                                 | 7.00E-43         | 98.90%        |
| gene 8        | 733        | WP_015521893        | hypothetical protein [Roseburia intestinalis].                                                 | 0                | 98.50%        |
| gene 9        | 143        | WP_015521892        | hypothetical protein [Roseburia intestinalis].                                                 | 7.00E-78         | 100%          |
| gene 10       | 85         | WP_015521891        | hypothetical protein [Roseburia intestinalis].                                                 | 5.00E-14         | 100%          |
| gene 11       | 38         | n/a                 | n/a                                                                                            | n/a              | n/a           |
| gene 12       | 526        | WP_015521890        | Putative phage replication protein RstA [Roseburia intestinalis].                              | 2.00E-281        | 99%           |
| gene 13       | 127        | WP_015521889        | hypothetical protein [Roseburia intestinalis].                                                 | 2.00E-52         | 97.60%        |
| gene 14       | 447        | WP_015521888        | DNA segregation ATPase FtsK/SpoIIIE and related proteins [Roseburia intestinalis].             | 4.00E-248        | 100%          |
| gene 15       | 153        | WP_015521887        | Bacterial protein of unknown function (DUF961) [Roseburia intestinalis].                       | 1.00E-81         | 99.30%        |
| gene 16       | 115        | WP_015521885        | Bacterial protein of unknown function (DUF961) [Roseburia intestinalis].                       | 2.00E-58         | 100%          |
| gene 17       | 177        | WP_015561495        | Bacterial protein of unknown function (DUF961) [Roseburia intestinalis].                       | 9.00E-97         | 100%          |
| gene 18       | 245        | WP_015561206        | hypothetical protein [Roseburia intestinalis].                                                 | 3.00E-126        | 93.60%        |
| gene 19       | 73         | WP_015561492        | hypothetical protein [Roseburia intestinalis].                                                 | 5.00E-25         | 80.80%        |
| gene 20       | 74         | WP_015561491        | hypothetical protein [Roseburia intestinalis].                                                 | 4.00E-34         | 95.90%        |
| gene 21       | 63         | WP_015521883        | hypothetical protein [Roseburia intestinalis].                                                 | 3.00E-30         | 98.40%        |
| gene 22       | 73         | WP_015561492        | hypothetical protein [Roseburia intestinalis].                                                 | 2.00E-34         | 100%          |
| gene 23       | 74         | WP_015561491        | hypothetical protein [Roseburia intestinalis].                                                 | 5.00E-36         | 100%          |
| gene 24       | 95         | WP_015561490        | hypothetical protein [Roseburia intestinalis].                                                 | 3.00E-38         | 100%          |
| gene 25       | 60         | WP_015561489        | hypothetical protein [Roseburia intestinalis].                                                 | 8.00E-23         | 100%          |
| gene 26       | 52         | WP_015561488        | hypothetical protein [Roseburia intestinalis].                                                 | 2.00E-06         | 100%          |
| gene 27       | 60         | WP_015561487        | hypothetical protein [Roseburia intestinalis].                                                 | 4.00E-27         | 100%          |
| gene 28       | 88         | WP_015561486        | hypothetical protein [Roseburia intestinalis].                                                 | 7.00E-21         | 100%          |
| gene 29       | 68         | WP_015521878        | Helix-turn-helix [Roseburia intestinalis].                                                     | 2.00E-29         | 98.50%        |
| gene 30       | 71         | WP_015521877        | hypothetical protein [Roseburia intestinalis].                                                 | 2.00E-33         | 100%          |
| gene 31       | 96         | WP_015521876        | hypothetical protein [Roseburia intestinalis].                                                 | 1.00E-49         | 100%          |
| gene 32       | 1134       | WP_006856044        | hypothetical protein [Roseburia intestinalis].                                                 | 9.00E-260        | 81.50%        |
| gene 33       | 213        | WP_003228230        | levansucrase [Bacillus subtilis].                                                              | 2.00E-92         | 100%          |

1  
2  
3

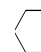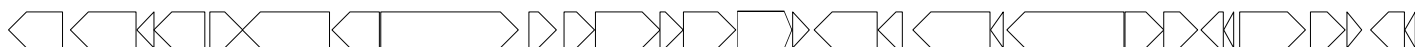

| Gene           | Length     | Accession Number    | Hit Definition                                                                     | E Value   | Identity    |
|----------------|------------|---------------------|------------------------------------------------------------------------------------|-----------|-------------|
| gene 1         | 449        | WP_011965543        | peptidase S41 [Bacteroides vulgatus].                                              | 3.00E-261 | 99.80%      |
| gene 2         | 546        | WP_005846096        | MULTISPECIES: aspartate aminotransferase [Bacteroides].                            | 0         | 100%        |
| gene 3         | 142        | WP_005848641        | transporter [Bacteroides vulgatus].                                                | 5.00E-46  | 100%        |
| gene 4         | 424        | WP_005846098        | transporter [Bacteroides vulgatus].                                                | 9.00E-208 | 99.80%      |
| gene 5         | 273        | WP_032946848        | hypothetical protein [Bacteroides vulgatus].                                       | 4.00E-156 | 99.60%      |
| gene 6         | 725        | WP_005846102        | hypothetical protein [Bacteroides vulgatus].                                       | 0         | 100%        |
| gene 7         | 394        | WP_005846104        | membrane protein [Bacteroides vulgatus].                                           | 9.00E-215 | 99.70%      |
| gene 8         | 1145       | WP_022508443        | MULTISPECIES: transcription-repair coupling factor [Bacteroides].                  | 0         | 100%        |
| gene 9         | 228        | WP_005848631        | MULTISPECIES: cell envelope biogenesis protein TonB [Bacteroides].                 | 1.00E-82  | 100%        |
| gene 10        | 253        | WP_032952525        | amidohydrolase [Bacteroides vulgatus].                                             | 2.00E-147 | 100%        |
| gene 11        | 538        | WP_032952524        | indolepyruvate ferredoxin oxidoreductase [Bacteroides vulgatus].                   | 1.00E-305 | 100%        |
| gene 12        | 193        | WP_005846114        | MULTISPECIES: indolepyruvate oxidoreductase [Bacteroides].                         | 6.00E-93  | 100%        |
| gene 13        | 435        | WP_005848625        | MULTISPECIES: aminotransferase [Bacteroides].                                      | 4.00E-232 | 100%        |
| gene 14        | 433        | WP_005846118        | MULTISPECIES: phenylacetate-CoA ligase [Bacteroidales].                            | 2.00E-249 | 100%        |
| gene 15        | 138        | WP_005846121        | MULTISPECIES: amino acid-binding protein [Bacteroides].                            | 1.00E-70  | 100%        |
| gene 16        | 524        | WP_016270074        | V-type H(+)-translocating pyrophosphatase [Bacteroides vulgatus].                  | 5.00E-255 | 100%        |
| gene 17        | 202        | WP_008671042        | potassium transporter [Bacteroides sp. 4_3_47FAA].                                 | 3.00E-71  | 100%        |
| gene 18        | 642        | WP_022508447        | uncharacterized protein [Bacteroides vulgatus CAG:6].                              | 0         | 99.40%      |
| gene 19        | 105        | WP_005846128        | MULTISPECIES: hypothetical protein [Bacteroides].                                  | 3.00E-52  | 100%        |
| <b>gene 20</b> | <b>975</b> | <b>WP_032952522</b> | <b>xanthan lyase [Bacteroides vulgatus].</b>                                       | <b>0</b>  | <b>100%</b> |
| gene 21        | 323        | WP_005848617        | alpha-1,3-galactosidase B [Bacteroides vulgatus].                                  | 7.00E-177 | 96.50%      |
| gene 22        | 282        | WP_032952521        | alpha-1,3-galactosidase B [Bacteroides vulgatus].                                  | 1.00E-164 | 100%        |
| gene 23        | 185        | WP_005848615        | MULTISPECIES: acyltransferase [Bacteroides].                                       | 3.00E-107 | 100%        |
| gene 24        | 82         | WP_005846136        | MULTISPECIES: hypothetical protein [Bacteroides].                                  | 2.00E-37  | 100%        |
| gene 25        | 547        | WP_005846138        | MULTISPECIES: diphosphate--fructose-6-phosphate1-phosphotransferase [Bacteroides]. | 0         | 100%        |
| gene 26        | 288        | WP_005848612        | MULTISPECIES: glycosyl hydrolase [Bacteroides].                                    | 4.00E-148 | 100%        |
| gene 27        | 122        | WP_005846143        | MULTISPECIES: membrane protein [Bacteroides].                                      | 2.00E-64  | 100%        |
| gene 28        | 281        | WP_005848610        | MULTISPECIES: 50S ribosomal protein L11 methyltransferase[Bacteroides].            | 9.00E-143 | 100%        |
| gene 29        | 86         | WP_005846148        | MULTISPECIES: glutaredoxin [Bacteroides].                                          | 6.00E-44  | 100%        |

1  
2  
3

33g20

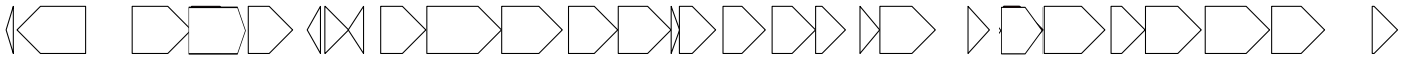

| Gene           | Length     | Accession Number    | Hit Definition                                                            | E Value          | Identity    |
|----------------|------------|---------------------|---------------------------------------------------------------------------|------------------|-------------|
| gene 1         | 46         | WP_032600916        | hypothetical protein, partial [Bacteroides fragilis].                     | 1.00E-17         | 100%        |
| gene 2         | 438        | WP_005817824        | aminotransferase [Bacteroides fragilis].                                  | 7.00E-238        | 100%        |
| gene 3         | 377        | WP_032529462        | aldo/keto reductase [Bacteroides fragilis].                               | 5.00E-220        | 100%        |
| gene 4         | 330        | WP_005787282        | MULTISPECIES: NADPH-flavin oxidoreductase [Bacteroides].                  | 9.00E-188        | 100%        |
| gene 5         | 283        | WP_009292263        | MULTISPECIES: 2,5-diketo-D-gluconic acid reductase [Bacteroides].         | 7.00E-162        | 100%        |
| gene 6         | 84         | WP_007481879        | AraC family transcriptional regulator [Bacteroides salyersiae].           | 3.00E-12         | 94.60%      |
| gene 7         | 151        | WP_032590016        | aldo/keto reductase [Bacteroides fragilis].                               | 2.00E-81         | 100%        |
| gene 8         | 97         | WP_032556675        | hypothetical protein [Bacteroides fragilis].                              | 5.00E-52         | 100%        |
| gene 9         | 288        | WP_005794287        | hypothetical protein [Bacteroides fragilis].                              | 1.00E-171        | 100%        |
| gene 10        | 477        | WP_032529461        | cation transporter [Bacteroides fragilis].                                | 1.00E-271        | 100%        |
| gene 11        | 387        | WP_032529460        | cystathionine beta-lyase [Bacteroides fragilis].                          | 4.00E-207        | 100%        |
| gene 12        | 314        | WP_032529459        | aldo/keto reductase [Bacteroides fragilis].                               | 9.00E-180        | 100%        |
| gene 13        | 337        | WP_032529503        | amidohydrolase [Bacteroides fragilis].                                    | 7.00E-194        | 100%        |
| gene 14        | 53         | WP_014298850        | short-chain dehydrogenase [Bacteroides fragilis].                         | 7.00E-18         | 100%        |
| gene 15        | 231        | WP_008660000        | MULTISPECIES: short-chain dehydrogenase [Bacteroides].                    | 4.00E-125        | 100%        |
| gene 16        | 270        | WP_010992873        | AraC family transcriptional regulator [Bacteroides fragilis].             | 7.00E-155        | 100%        |
| gene 17        | 277        | WP_005787306        | gamma-carboxymuconolactone decarboxylase [Bacteroides fragilis].          | 3.00E-150        | 99.60%      |
| gene 18        | 190        | WP_032529457        | flavodoxin [Bacteroides fragilis].                                        | 4.00E-105        | 100%        |
| gene 19        | 125        | WP_010992875        | acetyltransferase [Bacteroides fragilis].                                 | 3.00E-66         | 100%        |
| <b>gene 20</b> | <b>354</b> | <b>WP_032529456</b> | <b>beta-lactamase [Bacteroides fragilis].</b>                             | <b>2.00E-202</b> | <b>100%</b> |
| gene 21        | 136        | WP_014298855        | hypothetical protein [Bacteroides fragilis].                              | 4.00E-73         | 99.30%      |
| gene 22        | 250        | WP_032529455        | oxidoreductase [Bacteroides fragilis].                                    | 4.00E-138        | 100%        |
| gene 23        | 387        | WP_032574206        | aldo/keto reductase [Bacteroides fragilis].                               | 2.00E-202        | 100%        |
| gene 24        | 217        | WP_032529453        | 5-amino-6-(5-phosphoribosylamino)uracil reductase [Bacteroides fragilis]. | 8.00E-122        | 100%        |
| gene 25        | 356        | WP_032529452        | alpha/beta hydrolase [Bacteroides fragilis].                              | 6.00E-204        | 100%        |
| gene 26        | 411        | WP_032529451        | membrane protein [Bacteroides fragilis].                                  | 1.00E-208        | 100%        |
| gene 27        | 338        | WP_032529450        | aldo/keto reductase [Bacteroides fragilis].                               | 3.00E-195        | 100%        |
| gene 28        | 161        | WP_032529449        | membrane protein [Bacteroides fragilis].                                  | 8.00E-90         | 100%        |

1  
2  
3

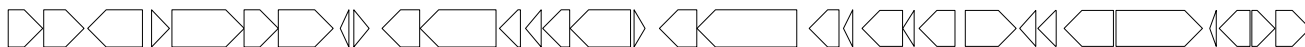

| Gene          | Length     | Accession Number    | Hit Definition                                                               | E Value          | Identity    |
|---------------|------------|---------------------|------------------------------------------------------------------------------|------------------|-------------|
| gene 1        | 279        | WP_005849599        | MULTISPECIES: glycerol acyltransferase [Bacteroides].                        | 7.00E-162        | 100%        |
| <b>gene 2</b> | <b>326</b> | <b>WP_005845337</b> | <b>MULTISPECIES: hemolysin [Bacteroides].</b>                                | <b>2.00E-187</b> | <b>100%</b> |
| gene 3        | 443        | WP_008781261        | MULTISPECIES: dehydrogenase [Bacteroides].                                   | 2.00E-254        | 100%        |
| gene 4        | 144        | WP_005845350        | MULTISPECIES: deoxyuridine 5'-triphosphate nucleotidohydrolase[Bacteroides]. | 2.00E-76         | 100%        |
| gene 5        | 585        | WP_005845352        | MULTISPECIES: hypothetical protein [Bacteroides].                            | 0                | 100%        |
| gene 6        | 277        | WP_016271912        | hypothetical protein [Bacteroides vulgatus].                                 | 6.00E-154        | 100%        |
| gene 7        | 444        | WP_016271913        | hypothetical protein [Bacteroides vulgatus].                                 | 3.00E-192        | 100%        |
| gene 8        | 69         | WP_008668465        | hypothetical protein [Bacteroides vulgatus].                                 | 4.00E-30         | 100%        |
| gene 9        | 123        | WP_005845358        | MULTISPECIES: RNA-binding protein [Bacteroides].                             | 3.00E-39         | 100%        |
| gene 10       | 304        | WP_005849590        | MULTISPECIES: glutaminase [Bacteroides].                                     | 4.00E-164        | 100%        |
| gene 11       | 614        | WP_032952213        | 4-hydroxy-3-methylbut-2-en-1-yl diphosphate synthase [Bacteroidesvulgatus].  | 0                | 100%        |
| gene 12       | 169        | WP_005845363        | MULTISPECIES: phosphoribosylaminoimidazole carboxylase[Bacteroides].         | 9.00E-73         | 100%        |
| gene 13       | 126        | WP_005845365        | MULTISPECIES: glycine cleavage system protein H [Bacteroides].               | 3.00E-66         | 100%        |
| gene 14       | 218        | WP_005845367        | membrane protein [Bacteroides vulgatus].                                     | 3.00E-116        | 100%        |
| gene 15       | 489        | WP_005845369        | MULTISPECIES: RNA polymerase sigma54 factor [Bacteroides].                   | 6.00E-263        | 100%        |
| gene 16       | 88         | WP_032952214        | xaa-Pro aminopeptidase [Bacteroides vulgatus].                               | 3.00E-38         | 100%        |
| gene 17       | 302        | WP_032952215        | ferredoxin [Bacteroides vulgatus].                                           | 2.00E-177        | 100%        |
| gene 18       | 808        | WP_032952216        | formate acetyltransferase [Bacteroides vulgatus].                            | 0                | 100%        |
| gene 19       | 241        | WP_005845380        | MULTISPECIES: ATPase AAA [Bacteroides].                                      | 2.00E-137        | 100%        |
| gene 20       | 74         | WP_005845380        | MULTISPECIES: ATPase AAA [Bacteroides].                                      | 9.00E-32         | 100%        |
| gene 21       | 342        | WP_004323659        | MULTISPECIES: mobilization protein [Bacteroidales].                          | 5.00E-187        | 99.40%      |
| gene 22       | 95         | WP_004310673        | MULTISPECIES: transcriptional regulator [Bacteroidales].                     | 3.00E-46         | 100%        |
| gene 23       | 302        | WP_007479974        | MULTISPECIES: hypothetical protein [Bacteroidales].                          | 1.00E-164        | 100%        |
| gene 24       | 428        | WP_008668453        | MULTISPECIES: mannose-1-phosphate guanylyltransferase[Bacteroides].          | 8.00E-191        | 100%        |
| gene 25       | 135        | WP_005845399        | MULTISPECIES: HIT family hydrolase [Bacteroides].                            | 3.00E-71         | 100%        |
| gene 26       | 154        | WP_005845398        | MULTISPECIES: transcription elongation factor GreA [Bacteroides].            | 1.00E-76         | 100%        |
| gene 27       | 415        | WP_005845396        | MULTISPECIES: hypothetical protein [Bacteroides].                            | 1.00E-209        | 100%        |
| gene 28       | 728        | WP_011965175        | MULTISPECIES: polynucleotide phosphorylase [Bacteroides].                    | 0                | 100%        |
| gene 29       | 54         | WP_005845392        | MULTISPECIES: rubredoxin [Bacteroides].                                      | 3.00E-27         | 100%        |
| gene 30       | 259        | WP_032952218        | NAD-dependent protein deacylase [Bacteroides vulgatus].                      | 3.00E-129        | 100%        |
| gene 31       | 194        | WP_005845388        | MULTISPECIES: peptidylprolyl isomerase [Bacteroides].                        | 9.00E-105        | 100%        |
| gene 32       | 288        | WP_005845386        | MULTISPECIES: peptidylprolyl isomerase [Bacteroides].                        | 9.00E-141        | 100%        |

1  
2  
3

37b14

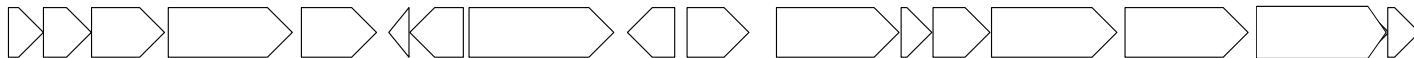

| Gene          | Length     | Accession Number    | Hit Definition                                                     | E Value   | Identity    |
|---------------|------------|---------------------|--------------------------------------------------------------------|-----------|-------------|
| gene 1        | 210        | WP_005784848        | chromosome partitioning protein ParB [Bacteroides fragilis].       | 2.00E-110 | 100%        |
| gene 2        | 288        | WP_005784846        | MULTISPECIES: hypothetical protein [Bacteroides].                  | 5.00E-149 | 100%        |
| gene 3        | 439        | WP_010992147        | lytic transglycosylase [Bacteroides fragilis].                     | 2.00E-244 | 100%        |
| <b>gene 4</b> | <b>747</b> | <b>WP_005784842</b> | <b>MULTISPECIES: GTP pyrophosphokinase [Bacteroides].</b>          | <b>0</b>  | <b>100%</b> |
| gene 5        | 452        | WP_008667781        | MULTISPECIES: transposase [Bacteroides].                           | 1.00E-259 | 99.60%      |
| gene 6        | 121        | WP_005784840        | MULTISPECIES: transcriptional regulator [Bacteroides].             | 8.00E-62  | 100%        |
| gene 7        | 322        | WP_005796222        | MULTISPECIES: peptidase M23 [Bacteroides].                         | 1.00E-184 | 100%        |
| gene 8        | 872        | WP_005796226        | MULTISPECIES: alanyl-tRNA synthetase [Bacteroides].                | 0         | 99.90%      |
| gene 9        | 284        | WP_005784835        | MULTISPECIES: AraC family transcriptional regulator [Bacteroides]. | 1.00E-163 | 100%        |
| gene 10       | 372        | WP_005784833        | MULTISPECIES: MFS transporter [Bacteroides].                       | 4.00E-192 | 100%        |
| gene 11       | 738        | WP_008658550        | MULTISPECIES: alpha-1 2-mannosidase [Bacteroides].                 | 0         | 100%        |
| gene 12       | 184        | WP_005784829        | MULTISPECIES: RNA polymerase sigma70 factor [Bacteroides].         | 2.00E-94  | 100%        |
| gene 13       | 342        | WP_010992141        | anti-sigma factor [Bacteroides fragilis].                          | 3.00E-188 | 100%        |
| gene 14       | 755        | WP_032595539        | alpha-mannosidase [Bacteroides fragilis].                          | 0         | 99.70%      |
| gene 15       | 741        | WP_014298248        | alpha-1 2-mannosidase [Bacteroides fragilis].                      | 0         | 99.90%      |
| gene 16       | 766        | WP_005784823        | membrane protein [Bacteroides fragilis].                           | 0         | 99.70%      |
| gene 17       | 191        | WP_010992139        | membrane protein [Bacteroides fragilis].                           | 2.00E-106 | 100%        |

1  
2  
3



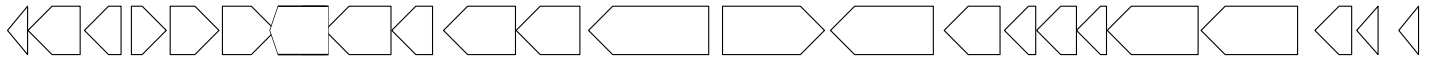

| Gene          | Length     | Accession Number    | Hit Definition                                                                 | E Value          | Identity    |
|---------------|------------|---------------------|--------------------------------------------------------------------------------|------------------|-------------|
| gene 1        | 122        | WP_008657495        | hypothetical protein [Bacteroides sp. 3_2_5].                                  | 1.00E-67         | 100%        |
| gene 2        | 132        | WP_005802341        | hypothetical protein [Bacteroides fragilis].                                   | 2.00E-68         | 100%        |
| gene 3        | 228        | WP_008657494        | MULTISPECIES: hypothetical protein [Bacteroides].                              | 7.00E-131        | 100%        |
| gene 4        | 600        | WP_005790703        | MULTISPECIES: dihydroxy-acid dehydratase [Bacteroides].                        | 0                | 100%        |
| gene 5        | 565        | WP_005790701        | MULTISPECIES: acetolactate synthase [Bacteroides].                             | 0                | 100%        |
| gene 6        | 186        | WP_032496973        | MULTISPECIES: acetoxyacid synthase small subunit[Bacteroides].                 | 8.00E-91         | 100%        |
| <b>gene 7</b> | <b>247</b> | <b>WP_005797964</b> | <b>MULTISPECIES: acyl-ACP thioesterase [Bacteroides].</b>                      | <b>9.00E-130</b> | <b>100%</b> |
| gene 8        | 194        | WP_008657489        | MULTISPECIES: hypothetical protein [Bacteroides].                              | 5.00E-108        | 100%        |
| gene 9        | 347        | WP_008769939        | ketol-acid reductoisomerase [Bacteroides fragilis].                            | 2.00E-189        | 100%        |
| gene 10       | 639        | WP_008657488        | MULTISPECIES: hypothetical protein [Bacteroides].                              | 0                | 100%        |
| gene 11       | 634        | WP_008657487        | MULTISPECIES: helicase [Bacteroides].                                          | 0                | 100%        |
| gene 12       | 747        | WP_032529063        | aconitate hydratase [Bacteroides fragilis].                                    | 0                | 100%        |
| gene 13       | 396        | WP_005790683        | MULTISPECIES: isocitrate dehydrogenase [Bacteroides].                          | 2.00E-218        | 100%        |
| gene 14       | 447        | WP_005790680        | MULTISPECIES: citrate synthase [Bacteroides].                                  | 2.00E-230        | 100%        |
| gene 15       | 253        | WP_005797955        | 3-oxo-5-alpha-steroid 4-dehydrogenase [Bacteroides fragilis].                  | 9.00E-143        | 100%        |
| gene 16       | 410        | WP_032529062        | NADH:flavin oxidoreductase [Bacteroides fragilis].                             | 1.00E-231        | 100%        |
| gene 17       | 290        | WP_005790670        | oxidoreductase [Bacteroides fragilis].                                         | 4.00E-157        | 100%        |
| gene 18       | 329        | WP_011203422        | 6-phosphofructokinase [Bacteroides fragilis].                                  | 6.00E-173        | 100%        |
| gene 19       | 303        | WP_005797949        | MULTISPECIES: 4-hydroxy-3-methylbut-2-enyl diphosphate reductase[Bacteroides]. | 7.00E-163        | 100%        |
| gene 20       | 216        | WP_005790663        | cytidylate kinase [Bacteroides fragilis CAG:47].                               | 1.00E-105        | 100%        |
| gene 21       | 227        | WP_025813996        | energy transducer TonB [Bacteroides fragilis].                                 | 2.00E-98         | 100%        |
| gene 22       | 324        | WP_005790657        | MULTISPECIES: isoprenyl synthetase [Bacteroides].                              | 4.00E-182        | 100%        |
| gene 23       | 125        | WP_005790656        | MULTISPECIES: hypothetical protein [Bacteroides].                              | 1.00E-64         | 100%        |

1  
2  
3

40k7

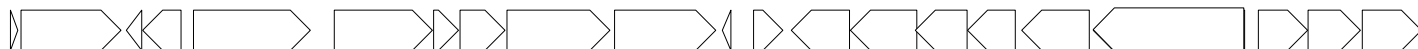

| Gene          | Length     | Accession Number    | Hit Definition                                                 | E Value   | Identity      |
|---------------|------------|---------------------|----------------------------------------------------------------|-----------|---------------|
| gene 1        | 54         | WP_008020625        | MULTISPECIES: lytic transglycosylase [Bacteroides].            | 4.00E-22  | 98.10%        |
| <b>gene 2</b> | <b>746</b> | <b>WP_009039031</b> | <b>GTP pyrophosphokinase [Bacteroides sp. D22].</b>            | <b>0</b>  | <b>99.70%</b> |
| gene 3        | 114        | WP_004301384        | MULTISPECIES: transcriptional regulator [Bacteroides].         | 6.00E-58  | 100%          |
| gene 4        | 286        | WP_004315137        | MULTISPECIES: peptidase M23 [Bacteroides].                     | 2.00E-163 | 100%          |
| gene 5        | 872        | WP_008642071        | alanyl-tRNA synthetase [Bacteroides sp. 1_1_30].               | 0         | 100%          |
| gene 6        | 732        | WP_015532344        | alpha-1,2-mannosidase, putative [Bacteroides xylanisolvens].   | 0         | 99.70%        |
| gene 7        | 185        | WP_008776778        | RNA polymerase sigma70 factor [Bacteroides sp. 2_2_4].         | 1.00E-101 | 98.90%        |
| gene 8        | 335        | WP_004301377        | MULTISPECIES: anti-sigma factor [Bacteroides].                 | 7.00E-189 | 100%          |
| gene 9        | 768        | WP_004315134        | MULTISPECIES: alpha-1 2-mannosidase [Bacteroides].             | 0         | 100%          |
| gene 10       | 755        | WP_004315133        | MULTISPECIES: alpha-1 2-mannosidase [Bacteroides].             | 0         | 99.20%        |
| gene 11       | 63         | WP_008020615        | hypothetical protein [Bacteroides xylanisolvens].              | 8.00E-28  | 100%          |
| gene 12       | 218        | WP_032851020        | Fic family protein [Bacteroides sp. D22].                      | 3.00E-88  | 96.40%        |
| gene 13       | 434        | WP_004315131        | MULTISPECIES: phage tail protein [Bacteroides].                | 4.00E-252 | 99.30%        |
| gene 14       | 495        | WP_008020609        | endo-beta-N-acetylglucosaminidase [Bacteroides xylanisolvens]. | 1.00E-277 | 99.60%        |
| gene 15       | 386        | WP_008020607        | phospholipase [Bacteroides xylanisolvens].                     | 3.00E-223 | 100%          |
| gene 16       | 356        | WP_008020604        | hypothetical protein [Bacteroides xylanisolvens].              | 6.00E-204 | 98.60%        |
| gene 17       | 504        | WP_008771072        | MULTISPECIES: hypothetical protein [Bacteroides].              | 1.00E-299 | 100%          |
| gene 18       | 1130       | WP_004312951        | MULTISPECIES: membrane protein [Bacteroides].                  | 0         | 99.90%        |
| gene 19       | 367        | WP_004314589        | MULTISPECIES: hypothetical protein [Bacteroides].              | 7.00E-188 | 95.90%        |
| gene 20       | 390        | WP_004314590        | MULTISPECIES: hypothetical protein [Bacteroides].              | 6.00E-224 | 99.70%        |
| gene 21       | 442        | WP_004314591        | MULTISPECIES: putative lipoprotein [Bacteroides].              | 4.00E-253 | 99.30%        |

1  
2  
3

1 **Table S2C. Swissprot analysis.** Each effector gene was aligned to the Swissprot database using ngKlast.  
 2 The top Swissprot hit is recorded along with the e value, percent identity (over the full effector gene), percent  
 3 identity (over the portion aligned), and taxonomy.  
 4

| Cbeg  | Effector Gene | Protein Length | Hit Accession | Hit Definition                                                                                                                                                                                                                                                                                                                       | E Value   | Identity | Align. Length | Align Id | Organism                                   | Taxonomy       |
|-------|---------------|----------------|---------------|--------------------------------------------------------------------------------------------------------------------------------------------------------------------------------------------------------------------------------------------------------------------------------------------------------------------------------------|-----------|----------|---------------|----------|--------------------------------------------|----------------|
| ppGpp | 1i11          | 701            | RELA_MYXXA    | RecName: Full=GTP pyrophosphokinase;EC=2.7.6.5;AltName: Full=(p)ppGpp synthase;AltName: Full=ATP:GTP 3'-pyrophosphotransferase;AltName: Full=ppGpp synthase I;                                                                                                                                                                       | 6.00E-117 | 45%      | 538           | 62.50%   | Myxococcus xanthus                         | Proteobacteria |
| 15    | 2m03          | 376            | MURG_BACV8    | RecName: Full=UDP-N-acetylglucosamine--N-acetylmuramyl-(pentapeptide) pyrophosphoryl-undecaprenol N-acetylglucosamine transferase {ECO:0000255 HAMAP-Rule:MF_00033};EC=2.4.1.227 {ECO:0000255 HAMAP-Rule:MF_00033};AltName: Full=Undecaprenyl-PP-MurNAc-pentapeptide-UDPGlcNAc GlcNAc transferase {ECO:0000255 HAMAP-Rule:MF_00033}; | 3.00E-165 | 83.70%   | 374           | 87.20%   | Bacteroides vulgatus ATCC 8482             | Bacteroidetes  |
| ppGpp | 3b03          | 746            | RELA_MYXXA    | RecName: Full=GTP pyrophosphokinase;EC=2.7.6.5;AltName: Full=(p)ppGpp synthase;AltName: Full=ATP:GTP 3'-pyrophosphotransferase;AltName: Full=ppGpp synthase I;                                                                                                                                                                       | 2.00E-108 | 42.30%   | 742           | 52.70%   | Myxococcus xanthus                         | Proteobacteria |
| 14    | 3e18          | 874            | SECY_STRSC    | RecName: Full=Protein translocase subunit SecY {ECO:0000255 HAMAP-Rule:MF_01465};                                                                                                                                                                                                                                                    | 0.31      | 28.70%   | 87            | 46%      | Streptomyces scabiei                       | Actinobacteria |
| 13    | 4h09          | 604            | YVGJ_BACSU    | RecName: Full=Lipoteichoic acid synthase-like YvgJ;Contains:RecName: Full=Uncharacterized protein YvgJ;Contains:RecName: Full=Processed uncharacterized protein YvgJ;                                                                                                                                                                | 1.00E-26  | 24.20%   | 322           | 41.30%   | Bacillus subtilis subsp. subtilis str. 168 | Firmicutes     |
| 5     | 4i05          | 959            | XANLY_BACGL   | RecName: Full=Xanthan lyase {ECO:0000312 EMBL:BAB21059.1};EC=4.2.2.12 {ECO:0000269 PubMed:9758797};Flags: Precursor;                                                                                                                                                                                                                 | 1.00E-05  | 36.40%   | 88            | 52.30%   | Bacillus sp. GL1                           | Firmicutes     |
| 12-2  | 8j18          | 326            | ASCC3_RAT     | RecName: Full=Activating signal cointegrator 1 complex subunit 3;EC=3.6.4.12;                                                                                                                                                                                                                                                        | 1         | 22.20%   | 135           | 41.50%   | Rattus norvegicus                          | Eukaryota      |
| 12-3  | 10o08         | 326            | ASCC3_RAT     | RecName: Full=Activating signal cointegrator 1 complex subunit 3;EC=3.6.4.12;                                                                                                                                                                                                                                                        | 1         | 22.20%   | 135           | 41.50%   | Rattus norvegicus                          | Eukaryota      |
| ppGpp | 15d03         | 756            | RELA_MYXXA    | RecName: Full=GTP pyrophosphokinase;EC=2.7.6.5;AltName: Full=(p)ppGpp synthase;AltName: Full=ATP:GTP 3'-pyrophosphotransferase;AltName: Full=ppGpp synthase I;                                                                                                                                                                       | 8.00E-113 | 38.90%   | 737           | 52.90%   | Myxococcus xanthus                         | Proteobacteria |
| ppGpp | 15m04         | 747            | RELA_STAAN    | RecName: Full=GTP pyrophosphokinase;EC=2.7.6.5;AltName: Full=(p)ppGpp synthase;AltName: Full=ATP:GTP 3'-pyrophosphotransferase;AltName: Full=ppGpp synthase I;                                                                                                                                                                       | 1.00E-104 | 45.40%   | 723           | 53.50%   | Staphylococcus aureus subsp. aureus N315   |                |
| 8     | 16f15         | 299            | ALYS_ENTFA    | RecName: Full=Autolysin;EC=3.2.1.-;AltName: Full=Beta-glycosidase;AltName: Full=Peptidoglycan hydrolase;Flags: Precursor;                                                                                                                                                                                                            | 5.00E-17  | 27.80%   | 295           | 47.50%   | Enterococcus faecalis V583                 | Firmicutes     |
| 2     | 18b09_1       | 1146           | SUSC_BACTN    | RecName: Full=TonB-dependent receptor SusC;AltName: Full=Starch-utilization system protein C;Flags: Precursor;                                                                                                                                                                                                                       | 1.00E-92  | 28.50%   | 1063          | 45%      | Bacteroides thetaiotaomicron VPI-5482      | Bacteroidetes  |
| 3     | 18b09_2       | 539            | SUSD_BACO1    | RecName: Full=SusD-like protein BACOVA_02651;Flags: Precursor;                                                                                                                                                                                                                                                                       | 8.00E-10  | 26.40%   | 197           | 45.70%   | Bacteroides ovatus ATCC 8483               | Bacteroidetes  |
| ppGpp | 21f12         | 756            | RELA_MYXXA    | RecName: Full=GTP pyrophosphokinase;EC=2.7.6.5;AltName: Full=(p)ppGpp synthase;AltName: Full=ATP:GTP 3'-pyrophosphotransferase;AltName: Full=ppGpp synthase I;                                                                                                                                                                       | 8.00E-113 | 38.90%   | 737           | 52.90%   | Myxococcus xanthus                         | Proteobacteria |

5  
6  
7

| Cbeg  | Effector Gene | Protein Length | Hit Accession | Hit Definition                                                                                                                                                                                                                                                | E Value   | Identity | Align. Length | Align Id | Organism                                   | Taxonomy       |
|-------|---------------|----------------|---------------|---------------------------------------------------------------------------------------------------------------------------------------------------------------------------------------------------------------------------------------------------------------|-----------|----------|---------------|----------|--------------------------------------------|----------------|
| ppGpp | 24i11         | 752            | RELA_MYXXA    | RecName: Full=GTP pyrophosphokinase;EC=2.7.6.5;AltName: Full=(p)ppGpp synthase;AltName: Full=ATP:GTP 3'-pyrophosphotransferase;AltName: Full=ppGpp synthase I;                                                                                                | 9.00E-109 | 40.30%   | 740           | 51.90%   | Myxococcus xanthus                         | Proteobacteria |
| 1     | 25h09         | 824            | BTUB_VIBVU    | RecName: Full=Vitamin B12 transporter BtuB {ECO:0000255}   HAMAP-Rule:MF_01531;AltName: Full=Cobalamin receptor {ECO:0000255}   HAMAP-Rule:MF_01531;AltName: Full=Outer membrane cobalamin translocator {ECO:0000255}   HAMAP-Rule:MF_01531;Flags: Precursor; | 7.00E-06  | 21.20%   | 510           | 39.40%   | Vibrio vulnificus CMCP6                    | Proteobacteria |
| 9     | 31i10         | 933            | P60_LISSE     | RecName: Full=Probable endopeptidase p60;EC=3.4.-.-;AltName: Full=Invasion-associated protein p60;Flags: Precursor;                                                                                                                                           | 2.00E-22  | 46.80%   | 124           | 62.10%   | Listeria seeligeri                         | Firmicutes     |
| 7     | 32o03_1       | 312            | YDDH_BACSU    | RecName: Full=Probable endopeptidase YddH;EC=3.4.-.-;Flags: Precursor;                                                                                                                                                                                        | 2.00E-50  | 35.40%   | 314           | 54.80%   | Bacillus subtilis subsp. subtilis str. 168 | Firmicutes     |
| 6     | 32o03_2       | 849            | YDDG_BACSU    | RecName: Full=Uncharacterized membrane protein YddG;Flags: Precursor;                                                                                                                                                                                         | 1.00E-13  | 22.70%   | 300           | 48%      | Bacillus subtilis subsp. subtilis str. 168 | Firmicutes     |
| 4     | 33g04         | 975            | XANLY_BACGL   | RecName: Full=Xanthan lyase {ECO:0000312}   EMBL: BAB21059.1;EC=4.2.2.12 {ECO:0000269}   PubMed:9758797;Flags: Precursor;                                                                                                                                     | 2.00E-06  | 31.90%   | 138           | 46.40%   | Bacillus sp. GL1                           | Firmicutes     |
| 10    | 33g20         | 354            | Y906_MYCTO    | RecName: Full=Uncharacterized protein MT0929;Flags: Precursor;                                                                                                                                                                                                | 1.00E-49  | 37.50%   | 301           | 55.10%   | Mycobacterium tuberculosis CDC1551         | Actinobacteria |
| 12    | 35i19         | 326            | ASCC3_RAT     | RecName: Full=Activating signal cointegrator 1 complex subunit 3;EC=3.6.4.12;                                                                                                                                                                                 | 1.31      | 22.20%   | 135           | 41.50%   | Rattus norvegicus                          | Eukaryota      |
| ppGpp | 37b14         | 747            | RELA_BACSU    | RecName: Full=GTP pyrophosphokinase;EC=2.7.6.5;AltName: Full=(p)ppGpp synthase;AltName: Full=ATP:GTP 3'-pyrophosphotransferase;AltName: Full=ppGpp synthase I;                                                                                                | 3.00E-107 | 38.70%   | 762           | 49%      | Bacillus subtilis subsp. subtilis str. 168 | Firmicutes     |
| 11    | 39k17         | 247            | FATA_CORSA    | RecName: Full=Oleoyl-acyl carrier protein thioesterase, chloroplastic;EC=3.1.2.14;AltName: Full=18:0-acyl-carrier protein thioesterase;Short=18:0-ACP thioesterase;AltName: Full=Acyl-[acyl-carrier-protein] hydrolase;Flags: Precursor; Fragment;            | 1.00E-12  | 24.20%   | 219           | 45.70%   | Coriandrum sativum                         | Eukaryota      |
| ppGpp | 40k7          | 746            | RELA_MYXXA    | RecName: Full=GTP pyrophosphokinase;EC=2.7.6.5;AltName: Full=(p)ppGpp synthase;AltName: Full=ATP:GTP 3'-pyrophosphotransferase;AltName: Full=ppGpp synthase I;                                                                                                | 6.00E-107 | 42.30%   | 742           | 52.60%   | Myxococcus xanthus                         | Proteobacteria |

1

2

**Table S3:** NMR spectroscopic data for compounds **1** – **4** in DMSO-*d*<sub>6</sub>.

| No.       | compound 1        |              |                | compound 2        |              |                | compound 3        |              |                | compound 4   |              |                |
|-----------|-------------------|--------------|----------------|-------------------|--------------|----------------|-------------------|--------------|----------------|--------------|--------------|----------------|
|           | $\delta_C^b$      | $\delta_H^a$ | <i>J</i> in Hz | $\delta_C^b$      | $\delta_H^a$ | <i>J</i> in Hz | $\delta_C^b$      | $\delta_H^a$ | <i>J</i> in Hz | $\delta_C^b$ | $\delta_H^a$ | <i>J</i> in Hz |
| <b>1</b>  | 170.4             |              |                | 170.4             |              |                | 170.4             |              |                | 170.4        |              |                |
| <b>2</b>  | 40.5              | 3.78         | dd (17.1, 6.2) | 40.5              | 3.78         | dd (17.1, 6.2) | 40.5              | 3.78         | dd (17.1, 6.2) | 40.5         | 3.78         | dd (17.1, 6.2) |
|           |                   | 3.85         | dd (17.1, 6.2) |                   | 3.85         | dd (17.1, 6.2) |                   | 3.85         | dd (17.1, 6.2) |              | 3.85         | dd (17.1, 6.2) |
| <b>3</b>  | 171.4             |              |                | 171.4             |              |                | 171.4             |              |                | 171.4        |              |                |
| <b>4</b>  | 43.6              | 2.19         | dd (14.0, 6.0) | 43.5              | 2.19         | dd (14.0, 6.0) | 43.5              | 2.19         | dd (14.0, 6.0) | 43.6         | 2.19         | dd (14.0, 6.0) |
|           |                   | 2.23         | dd (14.0, 6.0) |                   | 2.23         | dd (14.0, 6.0) |                   | 2.23         | dd (14.0, 6.0) |              | 2.23         | dd (14.0, 6.0) |
| <b>5</b>  | 67.3              | 3.78         | m              | 67.3              | 3.78         | m              | 67.3              | 3.78         | m              | 67.3         | 3.78         | m              |
| <b>6</b>  | 36.7              | 1.28         | m              | 36.7              | 1.28         | m              | 36.7              | 1.28         | m              | 36.7         | 1.28         | m              |
| <b>7</b>  | 25.1 <sup>c</sup> | 1.24         | m              | 24.9 <sup>c</sup> | 1.24         | m              | 25.1 <sup>c</sup> | 1.24         | m              | 25.1         | 1.24         | m              |
| <b>8</b>  | 29.1              | 1.24         | m              | 28.7 <sup>c</sup> | 1.24         | m              | 29.1 <sup>c</sup> | 1.24         | m              | 29.1         | 1.24         | m              |
| <b>9</b>  | 29.1              | 1.24         | m              | 29.2 <sup>c</sup> | 1.29         | m              | 28.9 <sup>c</sup> | 1.24         | m              | 29.1         | 1.24         | m              |
| <b>10</b> | 29.1              | 1.24         | m              | 26.6              | 1.99         | m              | 28.6 <sup>c</sup> | 1.24         | m              | 29.1         | 1.24         | m              |
| <b>11</b> | 29.1              | 1.24         | m              | 129.6             | 5.33         | m              | 19.1              | 1.29         | m              | 29.1         | 1.24         | m              |
| <b>12</b> | 29.1              | 1.24         | m              | 129.7             | 5.33         | m              | 26.6              | 1.99         | m              | 29.1         | 1.24         | m              |
| <b>13</b> | 29.1              | 1.24         | m              | 26.6              | 1.99         | m              | 129.6             | 5.33         | m              | 29.0         | 1.24         | m              |
| <b>14</b> | 29.1              | 1.24         | m              | 29.1 <sup>c</sup> | 1.29         | m              | 129.7             | 5.33         | m              | 31.3         | 1.24         | m              |
| <b>15</b> | 29.0 <sup>c</sup> | 1.24         | m              | 28.3 <sup>c</sup> | 1.24         | m              | 26.6              | 1.99         | m              | 22.1         | 1.26         | m              |
| <b>16</b> | 31.3              | 1.24         | m              | 31.1              | 1.24         | m              | 29.1              | 1.29         | m              | 13.8         | 1.85         | t (7.1)        |
| <b>17</b> | 22.1              | 1.26         | m              | 22.1              | 1.26         | m              | 28.3 <sup>c</sup> | 1.24         | m              |              |              |                |

|           |      |      |         |      |      |         |      |      |         |  |      |         |
|-----------|------|------|---------|------|------|---------|------|------|---------|--|------|---------|
| <b>18</b> | 13.8 | 1.85 | t (7.1) | 13.9 | 1.85 | t (7.1) | 31.1 | 1.24 | m       |  |      |         |
| <b>19</b> |      |      |         |      |      |         | 22.1 | 1.26 | m       |  |      |         |
| <b>20</b> |      |      |         |      |      |         | 13.9 | 1.85 | t (7.1) |  |      |         |
| <b>NH</b> |      | 8.23 | t (6.2) |      | 8.23 | t (6.2) |      | 8.23 | t (6.2) |  | 8.23 | t (6.2) |
| <b>OH</b> |      | 4.57 | brs     |      | 4.57 | brs     |      | 4.57 | brs     |  | 4.57 | brs     |

<sup>a</sup>recorded at 600 MHz, <sup>b</sup>recorded at 150 MHz, <sup>a,b</sup>signals were referenced to the DMSO-*d*<sub>6</sub> solvent signals ( $\delta_{\text{H}}$

2.50 and  $\delta_{\text{H}}$  39.51), <sup>c</sup>ambiguously assigned by comparing with predicted chemical shifts from ChemBioDraw

13.0.

1  
2  
3  
4  
5  
6  
7  
8  
9  
0  
1  
2  
3  
4
